# Supplementary material
Source: publisher figshare collection journal article supplement (https://diabetesjournals.figshare.com/articles/dataset/_/18857807)
Supplement: Supplementary file 1 [file 1]

## Supplementary Material

### Metabolomics and Diabetes: An updated Systematic Review and Meta-Analysis of prospective cohort studies

Morze J, Wittenbecher C, Schwingshackl L, Danielewicz A, Rynkiewicz A, Hu FB, Guasch-Ferré M

#### Content:

**Supplementary Table 1.** Changes adopted to the protocol for the updated systematic review.

**Supplementary Table 2.** Search strategies adopted for PubMed and Embase electronic databases.

**Supplementary Table 3.** Additional data received after contact with authors of included studies.

**Supplementary Table 4.** Assumptions for grouping of metabolites in the present meta-analysis.

**Supplementary Table 5.** Reasons for exclusion of studies during the examination of full-text articles.

**Supplementary Table 6.** Summary characteristics of prospective observational studies evaluating metabolomics and risk of incident type 2 diabetes.

**Supplementary Table 7.** Pooled relative risk for the association between study specific 1-SD increase in metabolite level and risk of incident type 2 diabetes.

**Supplementary Table 8.** Meta-regression analysis exploring the influence of number of carbons and double bonds on the association between lipid classes metabolites and incident type 2 diabetes risk.

**Supplementary Table 9.** Subgroup analysis for metabolites and risk of incident type 2 diabetes stratified for biospecimen: plasma samples and serum samples.

**Supplementary Table 10.** Subgroup analysis for metabolites and risk of incident type 2 diabetes stratified for study location: United States, Europe, and Asia.

**Supplementary Table 11.** Subgroup analysis for metabolites and risk of incident type 2 diabetes stratified for fasting status: fasting and non-fasting or mixed.

**Supplementary Table 12.** Subgroup analysis for metabolites and risk of incident type 2 diabetes stratified for metabolomic platform: mass spectrometry and nuclear magnetic resonance.

**Supplementary Table 13.** Subgroup analysis for metabolites and risk of incident type 2 diabetes stratified for fasting glucose adjustment: adjusted and non-adjusted.

**Supplementary Table 14.** Subgroup analysis for metabolites and risk of incident type 2 diabetes stratified for length of follow-up:  $\leq 7$  years and  $> 7$  years.

**Supplementary Figure 1.** Funnel plots showing study precision against the relative risk with 95% confidence intervals for incident type 2 diabetes.

**Supplementary Table 15.** Results of Egger's linear regression test for funnel plot asymmetry.

**Supplementary Table 1.** Changes adopted to the protocol for the updated systematic review.

| Adopted change              | Explanation and justification                                                                                                                                                                                                                                                                                                                                                                                                                                                                                                                                                                                                                                                                                                                                                                                                                                                                                                                                                                                                                                                                                                                                                                                                                                                                                                                                                                                                                                                                                                                                                                                                                                                                                                                                       |
|-----------------------------|---------------------------------------------------------------------------------------------------------------------------------------------------------------------------------------------------------------------------------------------------------------------------------------------------------------------------------------------------------------------------------------------------------------------------------------------------------------------------------------------------------------------------------------------------------------------------------------------------------------------------------------------------------------------------------------------------------------------------------------------------------------------------------------------------------------------------------------------------------------------------------------------------------------------------------------------------------------------------------------------------------------------------------------------------------------------------------------------------------------------------------------------------------------------------------------------------------------------------------------------------------------------------------------------------------------------------------------------------------------------------------------------------------------------------------------------------------------------------------------------------------------------------------------------------------------------------------------------------------------------------------------------------------------------------------------------------------------------------------------------------------------------|
| <b>Search strategy</b>      | <p>The pilot update search revealed that search terms used in the primary version of this systematic review did not identify all relevant reports.</p> <p>We extended the search strategy with additional terms for exposure (metabolomics, lipidomics) and study design (prospective observational studies). Additionally, we excluded terms related to prediabetes (i.e., glycemia and insulin resistance markers).</p>                                                                                                                                                                                                                                                                                                                                                                                                                                                                                                                                                                                                                                                                                                                                                                                                                                                                                                                                                                                                                                                                                                                                                                                                                                                                                                                                           |
| <b>Eligibility criteria</b> | <p>The primary systematic review identified 27 cross-sectional studies and 19 prospective cohort studies, reporting associations between metabolomics and prediabetes/type 2 diabetes. At the time of publication, the availability of prospective observational studies (with the overlapping list of metabolomic measures, allowing for meta-analysis) was low. Therefore, it seemed reasonable to include studies with a cross-sectional setting as a vital part of the available body of evidence at that time. Since the publication, the number of available prospective metabolomic studies has greatly increased. During the planning of the update, we assumed that also a number of metabolites eligible for meta-analysis will be much extended. Previous studies reported key differences between results of metabolomic assessments in prevalent and incident disease states.</p> <p>Considering that prospective studies provide higher certainty of evidence and better insight into the temporality of associations between metabolites and health outcome, we decided to reduce the focus of the current update to prospective studies.</p> <p>We also narrowed our endpoints only to incident type 2 diabetes, as prediabetes is rarely reported in prospective studies and has no homogeneous definition (e.g., risk of impaired fasting glucose or continuous changes in glycated hemoglobin), limiting use for meta-analysis.</p> <p>Moreover, as the primary focus of this systematic review was a quantitative summary of the evidence, we planned to exclude studies reporting only multivariable analyses (e.g., principal component analysis, network analysis). This was due to the inability to use these results in meta-analyses.</p> |
| <b>Primary analysis</b>     | <p>The previous version of this review assumed conducting random-effects meta-analysis for metabolites with at least three studies per comparison. In such case, risk estimates with 95% CIs (for one study-specific standard deviation increase in metabolite levels) were pooled with a random-effects model (with DerSimonian-Laird estimator). Secondly, those results were re-assessed with fixed-effects model.</p> <p>For the present update, we 1) conducted meta-analysis in case of 2 studies per comparison, 2) used restricted maximum-likelihood estimator (currently its use is recommended over method by DerSimonian-Laird), 3) did not use fixed-effects model as secondary analysis as high inconsistency between studies was expected.</p> <p>As included studies had used multiple testing correction to P-values (not estimates extracted for this review), and we had expected a large number of metabolites, we adjusted all analyses for false-discovery rate.</p>                                                                                                                                                                                                                                                                                                                                                                                                                                                                                                                                                                                                                                                                                                                                                                          |
| <b>Subgroup analysis</b>    | <p>In the current version of this review, we extended subgroup analyses by stratifying them for: 1) fasting status (fasted/mixed), 2) fasting glucose adjustment (yes/no), and 3) study location.</p> <p>Additionally, we conducted comprehensive meta-regression analyses to explore the effects of fatty acyl length and degree of unsaturation on associations between lipid classes and incident type 2 diabetes.</p> <p>We did not conduct meta-regression of men proportion (majority of included studies were set in community-based cohorts with a similar representation of men and women; only few were conducted solely in men or women) and subgroup analysis stratified for study design.</p>                                                                                                                                                                                                                                                                                                                                                                                                                                                                                                                                                                                                                                                                                                                                                                                                                                                                                                                                                                                                                                                          |

**Supplementary Table 2.** Search strategies adopted for PubMed and Embase electronic databases.

| PubMed                                                                                                                                                                                                                                                                                                                                                                                                                                                                                                                                                                                                                                             |
|----------------------------------------------------------------------------------------------------------------------------------------------------------------------------------------------------------------------------------------------------------------------------------------------------------------------------------------------------------------------------------------------------------------------------------------------------------------------------------------------------------------------------------------------------------------------------------------------------------------------------------------------------|
| ((metabolomics[MeSH Terms] OR metabolome[MeSH Terms] OR metabolite*[Title/abstract] OR metabolo*[Title/abstract] OR metabonom*[Title/abstract] OR metabolite network*[Title/abstract] OR metabolite profile*[Title/abstract] OR lipidom*[Title/abstract]) AND (diabetes mellitus[MeSH Terms] OR diabetes[Title/abstract]) AND (study[Title/abstract] OR prospective[Title/abstract] OR follow-up[Title/abstract] OR cohort[Title/abstract] OR longitudinal[Title/abstract] OR case-cohort[Title/abstract] OR nested case-control[Title/abstract])) NOT (animals[MeSH Terms] NOT humans[MeSH Terms])<br><b>Dates covered: 01.08.2015-06.03.2021</b> |
| Embase                                                                                                                                                                                                                                                                                                                                                                                                                                                                                                                                                                                                                                             |
| ('metabolomics'/de OR 'metabolome'/de OR metabolite*:ti,ab OR 'metabolo*:ti,ab OR 'metabonom*:ti,ab OR 'metabolite network*:ti,ab OR 'metabolite profile':ti,ab OR 'lipidomics'/de OR 'lipidome'/de OR 'lipidom*:ti,ab OR 'proteomics'/de OR 'proteome'/de OR 'proteom*:ti,ab) AND ('diabetes mellitus'/exp OR 'diabetes':ti,ab) AND ('study':ti,ab OR 'prospective':ti,ab OR 'follow-up':ti,ab OR 'cohort':ti,ab OR 'longitudinal':ti,ab OR 'case-cohort':ti,ab OR 'nested case-control':ti,ab) AND [humans]/lim<br><b>Dates covered: 01.08.2015-06.03.2021</b>                                                                                   |

**Supplementary Table 3.** Additional data received after contact with authors of included studies.

| Author (Reference)   | Description                                                                                                                                                                                                        |
|----------------------|--------------------------------------------------------------------------------------------------------------------------------------------------------------------------------------------------------------------|
| Rhee et al. 2011     | Risk estimates and 95% CIs for all analyzed metabolites. The original publication reported only those significantly ( $P < 0.05$ ) associated with incident type 2 diabetes.                                       |
| Fall et al. 2018     |                                                                                                                                                                                                                    |
| Gängler et al. 2019  |                                                                                                                                                                                                                    |
| Peddinti et al. 2017 |                                                                                                                                                                                                                    |
| Ottosson et al. 2018 | Multivariable adjusted risk estimates for all analyzed metabolites. The original article reported fully-adjusted estimates only for those metabolites which were found as significantly associated in crude model. |

**Supplementary Table 4.** Assumptions for grouping of metabolites in the present meta-analysis.

| Metabolite group | Description                                                                                                                                                                                                                                                                                                                                                                                                                                                                                                                                                                                                                                                                                                                                                                                                                                                                                                                                                                                                                   |
|------------------|-------------------------------------------------------------------------------------------------------------------------------------------------------------------------------------------------------------------------------------------------------------------------------------------------------------------------------------------------------------------------------------------------------------------------------------------------------------------------------------------------------------------------------------------------------------------------------------------------------------------------------------------------------------------------------------------------------------------------------------------------------------------------------------------------------------------------------------------------------------------------------------------------------------------------------------------------------------------------------------------------------------------------------|
| Glycerolipids    | <p>Depending on the applied protocol of metabolomics profiling, different precision of metabolomics data was provided. Glycerolipids were rather identified and reported at the <b>lipid species level (total N of carbons and double bonds in the particle)</b>, e.g., TG 52:2 rather than <b>fatty acid level</b> (content of fatty acids) and <b>fatty acid position</b> (content and specific position).</p> <p>Therefore, for analysis of glycerolipids, we generalized the information to lipid species level, e.g., TG 16:0_18:1_18:1 was converted to TG 52:1. In case that several particles had the same sum of N of carbons and double bonds, we pooled those estimates with a fixed-effects model.</p> <p>For glycerolipids, we ignored the type of bond: acyl or alkyl (as frequently not reported) and regarded all particles as having acyl bonds (mono-, di- and triacyl).</p> <p>Following subclasses were considered: 1) monoacylglycerols (MG), 2) diacylglycerols (DG), and 3) triacylglycerols (TG).</p> |

|                                           |                                                                                                                                                                                                                                                                                                                                                                                                                                                                                                                                                                                                                                                                                                                                                                                                                                                                                                                           |
|-------------------------------------------|---------------------------------------------------------------------------------------------------------------------------------------------------------------------------------------------------------------------------------------------------------------------------------------------------------------------------------------------------------------------------------------------------------------------------------------------------------------------------------------------------------------------------------------------------------------------------------------------------------------------------------------------------------------------------------------------------------------------------------------------------------------------------------------------------------------------------------------------------------------------------------------------------------------------------|
| Glycerophospholipids and their lyso-forms | <p>Similarly to glycerolipids, glycerophospholipids were predominately reported at <b>lipid species level</b> e.g., rather than <b>fatty acid level</b> or <b>fatty acid position</b> (content and specific position).</p> <p>We generalized the information to lipid species level (sum of carbons and double bonds in both, e.g., PE 16:0_18:2 was converted to PE 34:2. In case that several particles had the same sum of N of carbons and double bonds, we pooled those estimates with a fixed-effects model.</p> <p>For glycerophospholipids, we ignored type of bond: acyl, alkyl or plasmalogens and regarded all particles as having acyl bonds.</p> <p>Following subclasses were considered: 1) phosphatidylcholines (PC), 2) phosphatidylethanolamines (PE), 3) phosphatidylinositols (PI), 4) phosphatidylcholines (LPC), 5) lysophosphatidylethanolamines (LPE), and 6) lysophosphatidylinositols (LPI).</p> |
| Sphingomyelins                            | <p>Sphingomyelins like the rest of lipid classes were primarily reported at lipid species level. Similarly, we generalized the information to <b>lipid species level</b>.</p> <p>For sphingomyelins, this meant ignoring the type of sphingoid base as its N of carbons and double bonds were accounted in total N of carbons and double bonds (eg. SM 34:0). In case that several particles had the same sum of N of carbons and double bonds, we pooled those estimates with a fixed-effects model.</p> <p>All compounds were considered as a single class: 1) sphingomyelins (SM)</p>                                                                                                                                                                                                                                                                                                                                  |
| Ceramides                                 | <p>Ceramides, unlike other lipid classes, were almost consistently reported at <b>fatty acyl level</b> (Cer d18:0/16:0), which allowed for meta-analysis of particular metabolites rather than group of metabolites with similar composition. Here we ignored estimates for ceramides reported at the lipid species level (e.g., Cer 36:0)</p> <p>Among extracted ceramides, a few studies also reported cerebroside (ceramides with linked hexose), but we regarded them as a single class: 1) ceramides (Cer)</p>                                                                                                                                                                                                                                                                                                                                                                                                       |

**Supplementary Table 5.** Reasons for exclusion of studies during the examination of full-text articles.

| Reference | Reason                                                     |
|-----------|------------------------------------------------------------|
| (1)       | Adolescent population                                      |
| (2-14)    | Cross-sectional or retrospective case-control study design |
| (15-37)   | Conference abstract                                        |
| (38-46)   | Duplicated report                                          |
| (47-53)   | Metabolomics assessment not performed                      |
| (54-60)   | Multivariable analysis results only                        |
| (61-82)   | Not relevant outcome for extraction                        |
| (83)      | Review                                                     |

#### References:

1. Rauschert S, Uhl O, Koletzko B, Kirchberg F, Mori TA, Huang RC, Beilin LJ, Hellmuth C, Oddy WH. Lipidomics reveals associations of phospholipids with obesity and insulin resistance in young adults. *J Clin Endocrinol Metab* 2016;101:871-879
2. Fikri AM, Smyth R, Kumar V, Al-Abadla Z, Abusnana S, Munday MR. Pre-diagnostic biomarkers of type 2 diabetes identified in the UAE's obese national population using targeted metabolomics. *Sci Rep* 2020;10:17616

3. Padilha K, Venturini G, de Farias Pires T, Horimoto ARVR, Malagrino PA, Gois TC, Kiers B, Oliveira CM, de Oliveira Alvim R, Blatt C, Krieger JE, Pereira AC. Serum metabolomics profile of type 2 diabetes mellitus in a Brazilian rural population. *Metabolomics* 2016;12
4. Cao YF, Li J, Zhang Z, Liu J, Sun XY, Feng XF, Luo HH, Yang W, Li SN, Yang X, Fang ZZ. Plasma levels of amino acids related to urea cycle and risk of type 2 diabetes mellitus in Chinese adults. *Front Endocrinol (Lausanne)* 2019;10
5. Fernandez-Garcia JC, Delpino-Rius A, Samarra I, Castellano-Castillo D, Muñoz-Garach A, Bernal-Lopez MR, Queipo-Ortuño MI, Cardona F, Ramos-Molina B, Tinahones FJ. Type 2 diabetes is associated with a different pattern of serum polyamines: A case–control study from the PREDIMED-plus trial. *Journal of Clinical Medicine* 2019;8
6. Iida M, Takebayashi T, Kunitomi H, Matoba Y, Watanabe K, Iseki H, Sera A, Kobayashi Y, Tominaga E, Banno K, Tanaka M, Aoki D. Metabolomic profiling of prediabetes and diabetes among Japanese postmenopausal women. *J Obstet Gynaecol Res* 2018;44:1584
7. Li J, Cao YF, Sun XY, Han L, Li SN, Gu WQ, Song M, Jiang CT, Yang X, Fang ZZ. Plasma tyrosine and its interaction with low high-density lipoprotein cholesterol and the risk of type 2 diabetes mellitus in Chinese. *J Diabetes Investig* 2019;10:491-498
8. Liu X, Gao X, Zhang R, Liu Z, Shen N, Di Y, Fang T, Li H, Tian F. Discovery and comparison of serum biomarkers for diabetes mellitus and metabolic syndrome based on UPLC-Q-TOF/MS. *Clin Biochem* 2020;82:40-50
9. Urpi-Sarda M, Almanza-Aguilera E, Llorach R, Vázquez-Fresno R, Estruch R, Corella D, Sorli JV, Carmona F, Sanchez-Pla A, Salas-Salvadó J, Andres-Lacueva C. Non-targeted metabolomic biomarkers and metabolotypes of type 2 diabetes: A cross-sectional study of PREDIMED trial participants. *Diabetes Metab* 2019;45:167-174
10. Wildberg C, Masuch A, Budde K, Kastenmüller G, Artati A, Rathmann W, Adamski J, Kocher T, Völzke H, Nauck M, Friedrich N, Pietzner M. Plasma Metabolomics to Identify and Stratify Patients with Impaired Glucose Tolerance. *J Clin Endocrinol Metab* 2019;104:6357-6370
11. Wolak-Dinsmore J, Gruppen EG, Shalaurova I, Matyus SP, Grant RP, Gegen R, Bakker SJL, Otvos JD, Connelly MA, Dullaart RPF. A novel NMR-based assay to measure circulating concentrations of branched-chain amino acids: Elevation in subjects with type 2 diabetes mellitus and association with carotid intima media thickness. *Clin Biochem* 2018;54:92-99
12. Lee WJ, Ban HJ, Jang HB, Lee HJ, Lee HJ, Kim HJ, Cho SB, Park SI. Association of asymmetric dimethylarginine (ADMA) with insulin resistance and prediction of severe obesity in adolescents and diabetes in adults. *Obes Rev* 2016;17:109
13. Carter TC, Rein D, Padberg I, Peter E, Rennefahrt U, David DE, McManus V, Stefanski E, Martin S, Schatz P, Schrodi SJ. Validation of a metabolite panel for early diagnosis of type 2 diabetes. *Metabolism* 2016;65:1399-1408
14. Lee HS, Xu T, Lee Y, Kim NH, Kim YJ, Kim JM, Cho SY, Kim KY, Nam M, Adamski J, Suhre K, Rathmann W, Peters A, Wang-Sattler R, Han BG, Kim BJ. Identification of putative biomarkers for type 2 diabetes using metabolomics in the Korea Association Resource (KARE) cohort. *Metabolomics* 2016;12
15. Ahmad S, Demler O, Sun Q, Moorthy MV, Li C, Lee IM, Ridker PM, Manson JE, Hu FB, Fall T, Chasman DI, Cheng S, Pradhan AD, Mora S. Mediterranean Diet And Reduced Risk Of Diabetes: Potential Mediating Mechanisms. *Atherosclerosis* 2019;287:e43-e44
16. Bell JA, Bull CJ, Gunter MJ, Timpson NJ, Vincent EE. Emerging metabolic profile of type 2 diabetes: Using genetic susceptibility and repeat metabolomics to inform early detection. *Diabet Med* 2019;36:68
17. Chai JC, Li J, Yu B, Isasi C, Khambaty T, Van Horn L, Vidot DC, Castaneda S, Boerwinkle E, Qi Q. Metabolomic profiling and diabetes risk in u.s. hispanics/latinos: Hispanic community health study/study of latinos. *Diabetes* 2019;68
18. Chen ZZ, Gao Y, Cruz DE, Tahir U, Peterson B, Robbins J, Benson M, Ngo D, Correa A, Clish C, Wilson J, Gerszten RE. Metabolite markers of incident type 2 diabetes and cardiovascular disease in the Jackson heart study. *Circulation* 2019;140
19. De Mello Laaksonen VD, Lindström J, Lankinen MA, Paananen J, Pihlajamäki J, Auriola S, Lehtonen M, berg R, Nordin E, Ilanne-Parikka P, Keinänen-Kiukaanniemi S, Eriksson J, Tuomilehto J, Hanhineva K, Uusitupa M. Novel serum metabolites reflecting gut microbiota predict type 2 diabetes: Results from the finnish diabetes prevention study. *Diabetes* 2016;65:A408-A409
20. Gadgil MD, s C, Lewis MR, Kanaya AM, ula NR, Herrington DM. Circulating metabolites are associated with glycemic measures in South Asians. *Diabetes* 2020;69
21. Guasch M, Santos JL, Martinez-Gonzalez MA, Clish CB, Razquin C, Wang D, Liang L, Li J, Dennis C, Corella D, Estruch R, Alonso-Gomez AM, Serra-Majem L, Ros E, Colomer MF, Martínez JA, Salas-Salvadó J, Toledo E, Hu F,

- Ruiz-Canela M. Plasma glycolysis/gluconeogenesis and tca-related metabolites, mediterranean dietary pattern, and risk of type 2 diabetes. *Diabetes* 2019;68
22. Guasch-Ferré M, Ruiz-Canela M, Li J, Bullo M, Wang D, Toledo E, Clish C, Corella D, Estruch R, Ros E, Fitó M, Liang L, Martinez-Gonzalez MA, Hu FB, Salas-Salvado J. Plasma acylcarnitines and risk of type 2 diabetes in aMediterranean population at high cardiovascular risk. *Diabetologia* 2018;61:S145-S146
23. Hällfors J, Ruosaari S, Würtz P, Tertipis N. High-throughput metabolomics for early detection of individuals at increased risk for type 2 diabetes. *Eur J Hum Genet* 2019;27:1358
24. Kivelä J, Lindström J, Uusitupa M, Tuomilehto J. Serum branched chain amino acids, dietary macronutrients and development of type 2 diabetes in the Finnish Diabetes study. *Diabetologia* 2017;60:S295-S296
25. Koay YC, Yang P, Chen D, Jenkins AB, Greenfield J, O'Sullivan JF, Samocha-Bonet D. Novel circulating biomarkers identify insulin resistance phenotypes in obesity. *Obes Res Clin Pract* 2019;13:267-268
26. Lee HS, Park TJ, Kim BJ. Metabolic markers predictive of prediabetes in the Korean population. *Diabetes* 2018;67:LB55
27. Lu Y, Wang Y, Zou L, Ong CN, Koh WP, Pan A. Targeted metabolomics identifies metabolic signatures in association with type 2 diabetes in chinese adults. *Diabetes* 2017;66:A451
28. O'Sullivan JF, Morningstar JE, Zheng B, Jeanfavre S, Scott J, Yang Q, Fern, ez C, Vasan RS, Long MT, Mel, er O, Wang TJ, Fox C, Peterson RT, Clish C, Corey K, Gerszten RE. DMGV is a novel marker of liver fat and predicts future development of type 2 diabetes. *Circulation* 2016;134
29. Oresic M, Bondia Pons I, Cederberg H, Stančáková A, Suvitaival T, Kuusisto J, Nolan J, Hyötyläinen T, Laakso M. Serum lipidome as an independent predictor of progression to type 2 diabetes: the METSIM study. *Diabetologia* 2015;58:S23
30. Ozcariz E, Rojo G, Gil M, Guardiola M, Amigo N, Ribalta J. Characterization of the metabolomic profile by 1H-nuclear magnetic resonance spectroscopy in the DI@BET.ES study. *Atherosclerosis* 2020;315:e71
31. Razquin C, Toledo E, Clish C, Ruiz-canela M, Dennis C, Corella D, Ros E, Estruch R, Guasch-Ferre M, Gomez-Gracia E, Fito M, Yu E, Lapetra J, Wang D, Romaguera D, Liang L, Aros F, Pap, reou C, Diek A, Bullo M, Serra-Majem L, Jordi SS, Hu FB, Martinez-Gonzalez MA. Lipidome patterns and the risk of type 2 diabetes in the PREDIMED study. *Eur J Clin Invest* 2018;48:179
32. T'Hart LM, Molnos S, Eekhoff E, Flögel A, Grallert H, Wahl S, McCarthy MI, Gupta R, Pearson ER, Much D, Hummel S, Beekman M, Adamski J. A metabolite ratio associates with measures of insulin secretion and altered risk of type 2 diabetes; a DIRECT study. *Diabetologia* 2016;59:S142-S143
33. Tikkanen E, Gateva G, Hällfors J, Würtz P. State of the art metabolomics enables early detection, risk stratification and personalized follow-up in patients at increased risk for type 2 diabetes: Study in 11896 young adults. *Pediatr Diabetes* 2019;20:4-5
34. Würtz P. High-throughput metabolomics for detection of type 2 diabetes risk in 10,000 young adults. *Circulation* 2018;138
35. Guasch-Ferre M, Hu FB, Ruiz-Canela M, Bullo M, Yu E, Zheng Y, Toledo E, Wang DD, Hruby A, Corella D, Gomez-Gracia E, Fiol M, Estruch R, Lapetra J, Fito M, Aros F, Serra-Majem L, Ros E, Liang L, Clish C, Martinez-Gonzalez MA, Salas-Salvado J. Gut microbiota related plasma metabolites and risk of cardiovascular disease in the PREDIMED study. *Circulation* 2017;135
36. Lotta L, Newcombe P, Khaw KT, Wareham N, Langenberg C. Pathways to type 2 diabetes: Hypothesis-free discovery through integration of large-scale metabolomic and genomic data. *Diabetes* 2017;66:A66-A67
37. Merino J, Leong A, Walford GA, Porneala B, Dupuis J, Wang TJ, Gerszten RE, Florez JC, Meigs JB. Metabolomic insights on early type 2 diabetes pathogenesis and detection in individuals with normal fasting glucose. *Diabetes* 2017;66:A421
38. Dietrich S, Floegel A, Troll M, Kühn T, Rathmann W, Peters A, Sookthai D, Von Bergen M, Kaaks R, Adamski J, Prehn C, Boeing H, Schulze MB, Illig T, Pischon T, Knüppel S, Wang-Sattler R, Drogan D. Random Survival Forest in practice: A method for modelling complex metabolomics data in time to event analysis. *Int J Epidemiol* 2016;45:1406-1420
39. Liu J, van Klinken JB, Semiz S, van Dijk KW, Verhoeven A, Hankemeier T, Harms AC, Sijbr, s E, Sheehan NA, van Duijn CM, Demirkan A. A Mendelian Randomization Study of Metabolite Profiles, Fasting Glucose, and Type 2 Diabetes. *Diabetes* 2017;66:2915-2926
40. Papandreou C, Li J, Liang L, Bulló M, Zheng Y, Ruiz-Canela M, Yu E, Guasch-Ferré M, Razquin C, Clish C, Corella D, Estruch R, Ros E, Fitó M, Arós F, Serra-Majem L, Rosique N, Martínez-González MA, Hu FB, Salas-Salvado J. Metabolites related to purine catabolism and risk of type 2 diabetes incidence; modifying effects of the TCF7L2-rs7903146 polymorphism. *Sci Rep* 2019;9:2892

41. Tuomainen M, Lindström J, Lehtonen M, Auriola S, Pihlajamäki J, Peltonen M, Tuomilehto J, Uusitupa M, De Mello VD, Hanhineva K. Associations of serum indolepropionic acid, a gut microbiota metabolite, with type 2 diabetes and low-grade inflammation in high-risk individuals. *Nutr Diabetes* 2018;8
42. Van Valkengoed IGM, Argmann C, Ghauharali-Van Der Vlugt K, Aerts JMFG, Brewster LM, Peters RJG, Vaz FM, Houtkooper RH. Ethnic differences in metabolite signatures and type 2 diabetes: A nested case-control analysis among people of South Asian, African and European origin. *Nutr Diabetes* 2017;7
43. Wittenbecher C, Mühlenbruch K, Kröger J, Jacobs S, Kuxhaus O, Floegel A, Fritsche A, Pischon T, Prehn C, Adamski J, Joost HG, Boeing H, Schulze MB. Amino acids, lipid metabolites, and ferritin as potential mediators linking red meat consumption to type 2 diabetes. *Am J Clin Nutr* 2015;101:1241-1250
44. Ahola-Olli AV, Mustelin L, Kalimeri M, Kettunen J, Jokelainen JJ, Auvinen J, Puukka KS, Havulinna AS, Lehtimäki T, Kähönen M, Salomaa V, Perola M, Jarvelin MR, Ala-Korpela M, Wurtz P. Circulating metabolites and the risk of type 2 diabetes-a prospective study of 10,938 young adults from four Finnish cohorts. *Diabetes* 2018;67:A407
45. Ahola-Olli AV, Wurtz P, Kettunen J, Ala-Korpela M, Kangas AJ, Soininen P, Jokelainen J, Ronnema T, Viikari JS, Lehtimäki T, Juonala M, Perola M, Jarvelin MR, Salomaa V, Raitakari O. Metabolomic signature of incident type 2 diabetes: Evidence from NMR in over 18,000 individuals. *Eur Heart J* 2017;38:1133
46. Stancáková A, Civelek M, Saleem NK, Soininen P, Kangas AJ, Cederberg H, Paananen J, Pihlajamäki J, Bonnycastle LL, Morken MA, Boehnke M, Pajukanta P, Lusi AJ, Collins FS, Kuusisto J, Ala-Korpela M, Laakso M. Hyperglycemia and a common variant of GCKR are associated with the levels of eight amino acids in 9,369 Finnish men. *Diabetes* 2012;61:1895-1902
47. Belongie KJ, Ferrannini E, Johnson K, Andrade-Gordon P, Hansen MK, Petrie JR. Identification of novel biomarkers to monitor  $\beta$ -cell function and enable early detection of type 2 diabetes risk. *PLoS One* 2017;12
48. Harada PHN, Demler OV, Dugani SB, Akinkuolie AO, Moorthy MV, Ridker PM, Cook NR, Pradhan AD, Mora S. Lipoprotein insulin resistance score and risk of incident diabetes during extended follow-up of 20 years: The Women's Health Study. *J Clin Lipidol* 2017;11:1257-1267.e1252
49. Mirmiran P, Bahadoran Z, Tahmasebnejad Z, Azizi F, Ghasemi A. Circulating nitric oxide metabolites and the risk of cardiometabolic outcomes: a prospective population-based study. *Biomarkers* 2019;24:325-333
50. Molinaro A, Bel Lassen P, Henricsson M, Wu H, Adriouch S, Belda E, Chakaroun R, Nielsen T, Bergh PO, Rouault C, André S, Marquet F, Andreelli F, Salem JE, Assmann K, Bastard JP, Forslund S, Le Chatelier E, Falony G, Pons N, Prifti E, Quinquis B, Roume H, Vieira-Silva S, Hansen TH, Pedersen HK, Lewinter C, Sønderskov NB, Alves R, Amouyal C, Galijatovic EAA, Barthelemy O, Batisse JP, Berl M, Bittar R, Blottière H, Bosquet F, Boubrit R, Bourron O, Camus M, Cassuto D, Chilloux J, Ciangura C, Coelho LP, Collet JP, Dao MC, Djebbar M, Doré A, Engelbrechtsen L, Fellahi S, Fezeu L, Fromentin S, Giral P, Gøtze JP, Hartemann A, Holst JJ, Herberg S, Helft G, Hornbak M, Hulot JS, Isnard R, Jaqueminet S, Jørgensen NR, Julienne H, Justesen J, Kammer J, Krarup N, Kerneis M, Khemis J, Kristensen NB, Kuhn M, Lejard V, Levenez F, Lucas-Martini L, Massey R, Maziers N, Medina-Stamminger J, Montalescot G, Moutel S, Le Pavin LP, Poitou C, Pousset F, Pouzoulet L, Schmidt S, Moitinho-Silva L, Silvain J, Sokolovska N, Touch S, Svendstrup M, Swartz T, Uyvenboden T, Vatiér C, Walther S, Køber L, Vestergaard H, Hansen T, Zucker JD, Galan P, Dumas ME, Raes J, Oppert JM, Letunic I, Nielsen J, Bork P, Ehrlich SD, Stumvoll M, Pedersen O, Aron-Wisniewsky J, Clément K, Bäckhed F. Imidazole propionate is increased in diabetes and associated with dietary patterns and altered microbial ecology. *Nat Commun* 2020;11
51. O'Sullivan JF, Morningstar JE, Yang Q, Zheng B, Gao Y, Jeanfavre S, Scott J, Fern ez C, Zheng H, O'Connor S, Cohen P, Vasan RS, Long MT, Wilson JG, Mel, er O, Wang TJ, Fox C, Peterson RT, Clish CB, Corey KE, Gerszten RE. Dimethylguanidino valeric acid is a marker of liver fat and predicts diabetes. *J Clin Invest* 2017;127:4394-4402
52. Magnusson M, Wang TJ, Clish C, Engström G, Nilsson P, Gerszten RE, Mel, er O. Dimethylglycine deficiency and the development of diabetes. *Diabetes* 2015;64:3010-3016
53. Talaie M, Lee BL, Ong CN, Van Dam RM, Yuan JM, Koh WP, Pan A. Urine phyto-oestrogen metabolites are not significantly associated with risk of type 2 diabetes: The Singapore Chinese health study. *Br J Nutr* 2016;115:1607-1615
54. Lee Y, Pamungkas AD, Medrano CAD, Park J, Hong S, Jee SH, Park YH. High-resolution metabolomics determines the mode of onset of type 2 diabetes in a 3-year prospective cohort study. *Int J Mol Med* 2018;41:1069-1077
55. Menni C, Zhu J, Le Roy CI, Mompeo O, Young K, Rebholz CM, Selvin E, North KE, Mohny RP, Bell JT, Boerwinkle E, Spector TD, Mangino M, Yu B, Valdes AM. Serum metabolites reflecting gut microbiome alpha diversity predict type 2 diabetes. *Gut Microbes* 2020;11:1632-1642

56. Razquin C, Toledo E, Clish CB, Ruiz-Canela M, Dennis C, Corella D, Pap, reou C, Ros E, Estruch R, Guasch-Ferré M, Gómez-Gracia E, Fitó M, Yu E, Lapetra J, Wang D, Romaguera D, Liang L, Alonso-Gómez A, Deik A, Bullo M, Serra-Majem L, Salas-Salvadó J, Hu FB, Martínez-González MA. Plasma lipidomic profiling and risk of type 2 diabetes in the PREDIMED trial. *Diabetes Care* 2018;41:2617-2624
57. Yamakado M, Nagao K, Imaizumi A, Tani M, Toda A, Tanaka T, Jinzu H, Miyano H, Yamamoto H, Daimon T, Horimoto K, Ishizaka Y. Plasma Free Amino Acid Profiles Predict Four-Year Risk of Developing Diabetes, Metabolic Syndrome, Dyslipidemia, and Hypertension in Japanese Population. *Sci Rep* 2015;5:11918
58. Yengo L, Arredouani A, Marre M, Roussel R, Vaxillaire M, Falchi M, Haoudi A, Tichet J, Balkau B, Bonnefond A, Froguel P. Impact of statistical models on the prediction of type 2 diabetes using non-targeted metabolomics profiling. *Mol Metab* 2016;5:918-925
59. Zeng Y, Mtintsilana A, Goedecke JH, Micklesfield LK, Olsson T, Chorell E. Alterations in the metabolism of phospholipids, bile acids and branched-chain amino acids predicts development of type 2 diabetes in black South African women: a prospective cohort study. *Metabolism* 2019;95:57-64
60. Suvitaival T, Bondia-Pons I, Yetukuri L, Pöhö P, Nolan JJ, Hyötyläinen T, Kuusisto J, Orešič M. Lipidome as a predictive tool in progression to type 2 diabetes in Finnish men. *Metabolism* 2018;78:1-12
61. Mitro SD, Liu J, Jaacks LM, Fleisch AF, Williams PL, Knowler WC, Laferrère B, Perng W, Bray GA, Wallia A, Hivert MF, Oken E, James-Todd TM, Tempresa M. Per- and polyfluoroalkyl substance plasma concentrations and metabolomic markers of type 2 diabetes in the Diabetes Prevention Program trial. *Int J Hyg Environ Health* 2021;232:113680
62. Molnos S, Wahl S, Haid M, Eekhoff EMW, Pool R, Floegel A, Deelen J, Much D, Prehn C, Breier M, Draisma HH, van Leeuwen N, Simonis-Bik AMC, Jonsson A, Willemsen G, Bernigau W, Wang-Sattler R, Suhre K, Peters A, Thor, B, Herder C, Rathmann W, Roden M, Gieger C, Kramer MHH, van Heemst D, Pedersen HK, Gudmundsdottir V, Schulze MB, Pischon T, de Geus EJC, Boeing H, Boomsma DI, Ziegler AG, Slagboom PE, Hummel S, Beekman M, Grallert H, Brunak S, McCarthy MI, Gupta R, Pearson ER, Adamski J, 't Hart LM. Metabolite ratios as potential biomarkers for type 2 diabetes: a DIRECT study. *Diabetologia* 2018;61:117-129
63. Salihovic S, Broeckling CD, Ganna A, Prenni JE, Sundström J, Berne C, Lind L, Ingelsson E, Fall T, Ärnlöv J, Nowak C. Non-targeted urine metabolomics and associations with prevalent and incident type 2 diabetes. *Sci Rep* 2020;10:16474
64. Schillemans T, Shi L, Donat-Vargas C, Hanhineva K, Tornevi A, Johansson I, Koponen J, Kiviranta H, Rol, sson O, Bergdahl IA, berg R, Åkesson A, Brunius C. Plasma metabolites associated with exposure to perfluoroalkyl substances and risk of type 2 diabetes – A nested case-control study. *Environ Int* 2021;146
65. Chailurkit LO, Paiyabkhroma N, Sritara P, Vathesatogkit P, Yamwong S, Thonmung N, Ongphiphadhanakul B. Independent and opposite associations between branched-chain amino acids and lysophosphatidylcholines with incident diabetes in Thais. *Metabolites* 2020;10
66. Rauschert S, Uhl O, Koletzko B, Mori TA, Beilin LJ, Oddy WH, Hellmuth C. Sex differences in the association of phospholipids with components of the metabolic syndrome in young adults. *Biol Sex Differ* 2017;8:10
67. Cobb J, Eckhart A, Motsinger-Reif A, Carr B, Groop L, Ferrannini E.  $\alpha$ -Hydroxybutyric acid is a selective metabolite biomarker of impaired glucose tolerance. *Diabetes Care* 2016;39:988-995
68. Friedrich N, Skaaby T, Pietzner M, Budde K, Thuesen BH, Nauck M, Linneberg A. Identification of urine metabolites associated with 5-year changes in biomarkers of glucose homeostasis. *Diabetes Metab* 2018;44:261-268
69. Jun G, Aguilar D, Evans C, Burant CF, Hanis CL. Metabolomic profiles associated with subtypes of prediabetes among Mexican Americans in Starr County, Texas, USA. *Diabetologia* 2020;63:287-295
70. Kim YJ, Lee HS, Kim YK, Park S, Kim JM, Yun JH, Yu HY, Kim BJ. Association of metabolites with obesity and type 2 diabetes based on FTO genotype. *PLoS One* 2016;11
71. Lee HS, Park TJ, Kim JM, Yun JH, Yu HY, Kim YJ, Kim BJ. Identification of metabolic markers predictive of prediabetes in a Korean population. *Sci Rep* 2020;10:22009
72. Papandreou C, Bulló M, Ruiz-Canela M, Dennis C, Deik A, Wang D, Guasch-Ferré M, Yu E, Razquin C, Corella D, Estruch R, Ros E, Fitó M, Fiol M, Liang L, Hernández-Alonso P, Clish CB, Martínez-González MA, Hu FB, Salas-Salvadó J. Plasma metabolites predict both insulin resistance and incident type 2 diabetes: A metabolomics approach within the Prevención con Dieta Mediterránea (PREDIMED) study. *Am J Clin Nutr* 2019;109:635-647
73. Roy S, Yuzefpolskaya M, akumar R, Colombo PC, Demmer RT. Plasma Trimethylamine-N-oxide and impaired glucose regulation: Results from the Oral infections, Glucose Intolerance and Insulin Resistance Study (ORIGINS). *PLoS One* 2020;15
74. Stevens VL, Carter BD, McCullough ML, Campbell PT, Wang Y. Metabolomic Profiles Associated with BMI, Waist Circumference, and Diabetes and Inflammation Biomarkers in Women. *Obesity* 2020;28:187-196



75. Lee CC, Watkins SM, Lorenzo C, Wagenknecht LE, Il'Yasova D, Chen YDI, Haffner SM, Hanley AJ. Branched-chain amino acids and insulin metabolism: The Insulin Resistance Atherosclerosis Study (IRAS). *Diabetes Care* 2016;39:582-588
76. Lacruz ME, Kluttig A, Tiller D, Medenwald D, Giegling I, Rujescu D, Prehn C, Adamski J, Frantz S, Greiser KH, Emeny RT, Kastenmüller G, Haerting J. Cardiovascular Risk Factors Associated with Blood Metabolite Concentrations and Their Alterations during a 4-Year Period in a Population-Based Cohort. *Circ Cardiovasc Genet* 2016;9:487-494
77. Gadgil MD, Kanaya AM, s C, Lewis MR, ula NR, Herrington DM. Circulating metabolites and lipids are associated with glycaemic measures in South Asians. *Diabet Med* 2021;38
78. Savolainen O, Fagerberg B, Vendelbo Lind M, berg AS, Ross AB, Bergström G. Biomarkers for predicting type 2 diabetes development-Can metabolomics improve on existing biomarkers? *PLoS One* 2017;12:e0177738
79. Würtz P, Tiainen M, Mäkinen VP, Kangas AJ, Soininen P, Saltevo J, Keinänen-Kiukaanniemi S, Mäntyselkä P, Lehtimäki T, Laakso M, Jula A, Kähönen M, Vanhala M, Ala-Korpela M. Circulating metabolite predictors of glycemia in middle-aged men and women. *Diabetes Care* 2012;35:1749-1756
80. Shah SH, Crosslin DR, Haynes CS, Nelson S, Turer CB, Stevens RD, Muehlbauer MJ, Wenner BR, Bain JR, Laferrère B, Gorroochurn P, Teixeira J, Brantley PJ, Stevens VJ, Hollis JF, Appel LJ, Lien LF, Batch B, Newgard CB, Svetkey LP. Branched-chain amino acid levels are associated with improvement in insulin resistance with weight loss. *Diabetologia* 2012;55:321-330
81. Würtz P, Soininen P, Kangas AJ, Rönnemaa T, Lehtimäki T, Kähönen M, Viikari JS, Raitakari OT, Ala-Korpela M. Branched-chain and aromatic amino acids are predictors of insulin resistance in young adults. *Diabetes Care* 2013;36:648-655
82. Padberg I, Peter E, González-Maldonado S, Witt H, Mueller M, Weis T, Bethan B, Liebenberg V, Wiemer J, Katus HA, Rein D, Schatz P. A new metabolomic signature in type-2 diabetes mellitus and its pathophysiology. *PLoS One* 2014;9:e85082
83. Bahadoran Z, Mirmiran P, Jeddi S, Momenan AA, Azizi F, Ghasemi A. The nitrate-nitrite-nitric oxide pathway: Findings from 20 years of the Tehran lipid and glucose study. *Int J Endocrinol Metab* 2018;16

**Supplementary Table 6.** Summary characteristics of prospective observational studies evaluating metabolomics and risk of incident type 2 diabetes.

| Reference              | Study name, Location                       | Study design                                    | Participants (Cases)                          | Follow-up      | Platform, technique and metabolite targets                                                                                                                                  | Biological sample (Fasting status) | Covariate adjustment set                                                                                                                                                                                                                                                                  | Main findings                                                                                                                                                                                                                                                                                                                                                                                                                                                                                                                                  | Study quality |
|------------------------|--------------------------------------------|-------------------------------------------------|-----------------------------------------------|----------------|-----------------------------------------------------------------------------------------------------------------------------------------------------------------------------|------------------------------------|-------------------------------------------------------------------------------------------------------------------------------------------------------------------------------------------------------------------------------------------------------------------------------------------|------------------------------------------------------------------------------------------------------------------------------------------------------------------------------------------------------------------------------------------------------------------------------------------------------------------------------------------------------------------------------------------------------------------------------------------------------------------------------------------------------------------------------------------------|---------------|
| Ahola-Olli et al. 2019 | DILGOM, FINRISK-1997, NFBC, YFS, (Finland) | Prospective cohort                              | 11,896 (392 incident type 2 diabetes cases)   | 8.0-15.0 years | <b>Platform: Nightingale Health</b> NMR; targeted (229 metabolic measures including amino acids, glycolysis-related metabolites, fatty acids and lipoprotein lipid profile) | Serum (Mixed)                      | Age, sex, BMI, plasma FG                                                                                                                                                                                                                                                                  | (↑) <b>BCAA</b> (isoleucine, leucine, valine), <b>AAA</b> (phenylalanine, tyrosine), glycerol, glycoprotein acetyls, <b>FA</b> (total circulating FA, relative MUFA), <b>VLDL</b> (particle size, cholesterol and TG by size classes), <b>LDL</b> (cholesterol by size classes), <b>IDL</b> (cholesterol), <b>HDL</b> (cholesterol in S/M particles), ApoB, ApoB/A1 (↓) <b>FA</b> (relative PUFA, n-6 and linoleic acid), <b>HDL</b> (cholesterol in L/XL particles, particle size)                                                            | 5             |
| Chen et al. 2016       | SHDS (China)                               | Prospective cohort                              | 213 (51 incident type 2 diabetes cases)       | 10.0 years     | <b>Platform: In-house</b> UPLC-MS/MS; targeted (5 metabolites including BCAA and AA)                                                                                        | Serum (Fasting)                    | Age, gender, BMI, fasting and postprandial glucose, fasting and postprandial insulin, TC, TG, HDL-C, LDL-C, SBP, DBP, and HOMA-IR                                                                                                                                                         | (↑) <b>BCAA</b> (isoleucine, leucine, valine), <b>AAA</b> (phenylalanine, tyrosine)                                                                                                                                                                                                                                                                                                                                                                                                                                                            | 3.5           |
| Chen et al. 2019       | DPP (US)                                   | Combined nested case-control studies from a RCT | 2,015 (18.5% cases developed type 2 diabetes) | 3.2 years      | <b>Platform: Broad Institute</b> LC-MS/MS; targeted (331 metabolites including amino acids, amides, lipids, organic acids)                                                  | Plasma (Fasting)                   | Age, sex, race/ethnicity, hypertension status, baseline FG, and baseline BMI                                                                                                                                                                                                              | (↑) <b>Acylcarnitines</b> (C5, C5-DC), cotinine, DG (32:0, 34:2, 38:4, 36:1, 32:1, 34:3, 30:0, 38:5, 36:2, 32:2), <b>carbohydrates</b> (glucose, fructose, galactose), isoleucine, <b>PE</b> (36:2, 34:2, 38:4, 36:4, 36:4, 40:6, 46:1, 36:3, 38:6), <b>TG</b> (50:1, 50:2, 48:1, 48:0, 46:1, 52:1, 46:2, 50:0, 44:0, 48:2) (↓) 1,5-Anhydroglucitol, <b>AA</b> (asparagine, glutamine, glycine, serine), betaine, bilirubin, <b>CE</b> (16:0, 18:2), <b>PCP</b> (24:1, 36:1, 34:1, 34:2, 26:1, 36:4), <b>SM</b> (22:1, 16:0, 18:1, 16:1, 18:2) | 4.5           |
| Chen et al. 2020       | HCHS/SOL (US)                              | Prospective cohort                              | 2,010 (224 incident type 2 diabetes cases)    | 6.0 years      | <b>Platform: Metabolon Inc.</b> UPLC-MS/MS; non-targeted (43 metabolites from lipid classes: ceramides, glucosylceramides, lactosylceramides, sphingomyelins)               | Serum (Fasting)                    | Age, sex, Hispanic/ Latino background, US native, education, annual household income, AHEI-2010 score, total energy intake, smoking status, drinking status, physical activity, use of hypertensive or lipid-lowering drugs, fasting time for blood drawn, and family history of diabetes | (↑) <b>Cer</b> (d18:1/16:0, d18:1/18:0), <b>GlcCer</b> d18:1/24:1(2OH), <b>SM</b> (36:0, 38:0, d18:0/22:0 [0 db], d18:1/22:0 [1db], D18:1/24:0)                                                                                                                                                                                                                                                                                                                                                                                                | 4.5           |
| Chew et al. 2019       | SMEC (Singapore)                           | Prospective cohort                              | 2,302 (170 incident type 2 diabetes cases)    | 10.0 years     | <b>Platform: In-house</b> UPLC-MS/MS; targeted (331 metabolites from lipid classes: including ceramides, cerebroside, globosides,                                           | Plasma (Fasting)                   | Age, sex, LDL-C, HDL-C, triglycerides, BMI, HbA1c                                                                                                                                                                                                                                         | (↑) <b>SM</b> (d16:1/18:0, d18:1/18:0)                                                                                                                                                                                                                                                                                                                                                                                                                                                                                                         | 5.5           |

|                       |                   |                     |                                                                          |            |                                                                                                                                                      |                  |                       |                                                                                                                                                                                                                                                                                                                                                                                                                                                                                                                                                                                                                        |     |
|-----------------------|-------------------|---------------------|--------------------------------------------------------------------------|------------|------------------------------------------------------------------------------------------------------------------------------------------------------|------------------|-----------------------|------------------------------------------------------------------------------------------------------------------------------------------------------------------------------------------------------------------------------------------------------------------------------------------------------------------------------------------------------------------------------------------------------------------------------------------------------------------------------------------------------------------------------------------------------------------------------------------------------------------------|-----|
|                       |                   |                     |                                                                          |            | gangliosides, sphingomyelins, sphingosines)                                                                                                          |                  |                       |                                                                                                                                                                                                                                                                                                                                                                                                                                                                                                                                                                                                                        |     |
| de Mello et al. 2017  | FDPS (Finland)    | Prospective cohort  | 200 (96 incident type 2 diabetes cases)                                  | 15.0 years | <b>Platform: In-house</b> UHPLC-MS/MS; non-targeted (>8600 metabolic features including amino acids, phospholipids and bile acids)                   | Serum (Fasting)  | Study group           | (↑) <b>AA</b> (phenylalanine, alanine, tyrosine, proline, isoleucine, leucine), <b>Bile acids</b> : (glycocholic, taurochenodeoxycholic, glycochenodeoxycholic, glycodeoxycholic, deoxycholic, cholic), Phe-Phe dipeptide, LPE (18:0)<br>(↓) betaine, indolepropionic acid, <b>LPC</b> (17:0, 19:0, 20:1, 15:1, LPC 18:1, 15:0, 18:2), <b>LPE</b> (16:0, 18:0), <b>PC</b> (22:6/18:2, 18:1, 22:6, 20:4/17:0, 22:6/17:0, 15:1/18:2, 18:2/15:0, 18:2/17:0, 22:6/16:0, 20:3/18:0, 14:0/18:1)                                                                                                                              | 3.5 |
|                       | METSIM            | Prospective cohort  | 110 (55 incident type 2 diabetes cases)                                  | 5.9 years  |                                                                                                                                                      |                  |                       |                                                                                                                                                                                                                                                                                                                                                                                                                                                                                                                                                                                                                        |     |
|                       | BioDIVA           | Nested case-control | 1,006 (503 incident type 2 diabetes cases)                               | 7.0 years  |                                                                                                                                                      |                  |                       |                                                                                                                                                                                                                                                                                                                                                                                                                                                                                                                                                                                                                        |     |
| Fall et al. 2016      | ULSAM (Sweden)    | Prospective cohort  | 1,138 (78 incident type 2 diabetes cases)                                | NA         | <b>Platform: In-house</b> UPLC-MS/MS; non-targeted (>7000 metabolic features including phospholipids, fatty acids, amino acids, bile acids)          | Serum (Fasting)  | Age, sex, WC, BMI, FG | (↑) 2-methylbutyrylcarnitine, barogenin, γ-glutamyl-leucine, tyrosine, deoxycholic acid, MG(18:2)<br>(↓) cortisol, <b>LPC</b> (O-16:1/0:0, 20:2), <b>SM</b> (33:1, d18:2/18:1, 34:2), PC 42:7, CerPE 38:2                                                                                                                                                                                                                                                                                                                                                                                                              | 4   |
|                       | PIVUS (Sweden)    | Prospective cohort  | 970 (70 incident type 2 diabetes cases)                                  | NA         |                                                                                                                                                      |                  |                       |                                                                                                                                                                                                                                                                                                                                                                                                                                                                                                                                                                                                                        |     |
|                       | TwinGene (Sweden) | Case-cohort         | Subcohort: 1,549<br>Case-cohort: 81 (122 incident type 2 diabetes cases) | NA         |                                                                                                                                                      |                  |                       |                                                                                                                                                                                                                                                                                                                                                                                                                                                                                                                                                                                                                        |     |
|                       | KORA (Germany)    | Prospective cohort  | 855 (88 cases incident type 2 diabetes)                                  | 7.0 years  | <b>Platform: Metabolon Inc.</b> GC-MS; UPLC-MS; non-targeted (validation)                                                                            |                  |                       |                                                                                                                                                                                                                                                                                                                                                                                                                                                                                                                                                                                                                        |     |
| Fernandez et al. 2020 | MDC (Sweden)      | Prospective cohort  | 3,668 (506 incident type 2 diabetes cases)                               | 21.2 years | <b>Platform: Lipotype</b> MS; targeted (178 metabolites from lipid classes: cholesteryl esters, glycerolipids, glycerophospholipids, sphingomyelins) | Plasma (Fasting) | Age, sex              | (↑) <b>DG</b> (16:0/18:1, 16:0/18:2, 16:1/18:1, 18:1/18:1). <b>PC</b> (16:0/20:3, 18:0/20:3), <b>TG</b> (46:1, 46:2, 48:0, 48:1, 48:2, 48:3, 49:1, 49:2, 50:1, 50:2, 50:3, 50:4, 51:1, 51:2, 51:3, 52:2, 52:3, 52:5, 53:2, 54:3, 54:6, 54:7, 56:3, 56:5, 56:6, 56:7, 58:7), SM 40:1<br>(↓) <b>CE</b> (20:2), <b>DG</b> (18:1/18:3), <b>LPC</b> 18:2, <b>LPE</b> (18:1, 18:2, 20:4), <b>PC</b> (15:0/18:2, 18:2/18:2, O-16:0/16:0, O-16:0/18:1, O-16:0/18:2, O-16:1/16:0, O-16:1/18:0, O-16:1/18:1, O-16:1/18:2, O-16:2/18:0, O-18:0/20:4, O-18:1/18:2, O-18:2/16:0, O-18:2/18:1), <b>PE</b> (O-18:1/18:1, O-18:2/18:2) | 5   |
| Friedrich et al. 2015 | SHIP (Germany)    | Prospective cohort  | 2,709 (137 incident type 2 diabetes cases)                               | 5.0 years  | <b>Platform: In-house</b> NMR; targeted (43 metabolites including amino acids, amines, organic acids)                                                | Urine            | Age, WC               | (↑) <b>Women</b> : acetate, alanine, carnitine, ethanol, formate, glucose, glycine, glycolate, lactate, dimethylglycine, TMAO, trigonelline, urea, 3-hydroxyisovalerate; <b>Men</b> : glucose<br>(↓) <b>Women</b> : Creatinine                                                                                                                                                                                                                                                                                                                                                                                         | 4.5 |

|                          |                  |                     |                                            |            |                                                                                                                                                                 |                         |                                                                                                                                                                                                                                                                                                  |                                                                                                                                                                                                                                                                                                                                                                                                                                                                                                                                                                                                                                                                                |     |
|--------------------------|------------------|---------------------|--------------------------------------------|------------|-----------------------------------------------------------------------------------------------------------------------------------------------------------------|-------------------------|--------------------------------------------------------------------------------------------------------------------------------------------------------------------------------------------------------------------------------------------------------------------------------------------------|--------------------------------------------------------------------------------------------------------------------------------------------------------------------------------------------------------------------------------------------------------------------------------------------------------------------------------------------------------------------------------------------------------------------------------------------------------------------------------------------------------------------------------------------------------------------------------------------------------------------------------------------------------------------------------|-----|
| Gängler et al. 2019      | HUNT (Norway)    | Nested case-control | 430 (215 incident type 2 diabetes cases)   | 3.6 years  | <b>Platform: Metabolon Inc.</b><br>UHPLC-MS/MS; non-targeted (735 metabolites including amino acids, carbohydrates, lipids, nucleotides, peptides, xenobiotics) | Serum (Mixed, adjusted) | Age, sex, BMI                                                                                                                                                                                                                                                                                    | (↑) 2-pyrrolidinone, 3-methyl-2-oxobutyrate, 4-methyl-2-oxopentanoate, 5-bromotryptophan, 5-methylthioadenosine, α-ketoglutarate, <b>AA</b> (glutamate, isoleucine, phenylalanine, thioproline, tryptophan, tyrosine, valine) <b>Carbohydrates</b> (glucose, mannose), <b>Dipeptides</b> (γ-glutamylisoleucine, γ-glutamylphenylalanine, γ-glutamyltyrosine, γ-glutamylvaline), PC 16:0/18:1, PE 16:0/18:1 (↓) 1,5-AG, carotene diol, docosahexaenoylcholine, GlcCer 18:2/24:1, imidazole lactate, N-acetylglycine, <b>SM</b> (16:1/22:2, 18:1/20:1, 18:1/20:2, 18:1/24:1, 18:2/20:0, 18:2/20:1, 18:2/24:1, 18:2/24:2), <b>PC</b> (16:0/16:0, 16:0/16:1, 16:0/18:1, 16:0/18:2) | 4   |
| Guasch-Ferre et al. 2019 | PREDIMED (Spain) | Case-cohort         | 892 (251 incident type 2 diabetes cases)   | 3.8 years  | <b>Platform: Broad Institute</b><br>LC-MS/MS; targeted (28 metabolites; acylcarnitines and carnitine)                                                           | Plasma (Fasting)        | Age, sex, center, smoking, BMI, hypertension, dyslipidemia, physical activity, baseline FG                                                                                                                                                                                                       | (↑) <b>Acylcarnitines</b> (C2, C3, C4OH, C5, C6) (↓) <b>Acylcarnitines</b> (C5DC, C18, C18:1, C20)                                                                                                                                                                                                                                                                                                                                                                                                                                                                                                                                                                             | 5   |
| Guasch-Ferre et al. 2020 | PREDIMED (Spain) | Case-cohort         | 889 (251 incident type 2 diabetes cases)   | 3.8 years  | <b>Platform: Broad Institute</b><br>LC-MS/MS; targeted (14 metabolites including organic acids, sugar phosphates, purines, pyrimidines, bile acids)             | Plasma (Fasting)        | Age, sex, intervention group, BMI, smoking, leisure-time physical activity, dyslipidemia, hypertension, baseline FG, recruitment center                                                                                                                                                          | (↑) Alanine, glycerol 3-phosphate, hexose monophosphate, isocitrate, lactate                                                                                                                                                                                                                                                                                                                                                                                                                                                                                                                                                                                                   | 5   |
| Gunther et al. 2020      | SP2 (Singapore)  | Prospective cohort  | 3,313 (314 incident type 2 diabetes cases) | 8.4 years  | <b>Platform: In-house</b><br>LC-MS/MS; targeted (59 metabolites including acylcarnitines and amino acids)                                                       | Serum (Fasting)         | Age, sex, ethnicity, height, parental history of diabetes                                                                                                                                                                                                                                        | (↑) <b>Acylcarnitines</b> (C4, C16-OH), alanine, <b>AA</b> (phenylalanine, tyrosine), <b>BCAA</b> (isoleucine/leucine, valine) glutamate/glutamine, ornithine, proline (↓) Acylcarnitine C8-DC, glycine, serine                                                                                                                                                                                                                                                                                                                                                                                                                                                                | 4.5 |
| Hang et al. 2020         | NHS, NHSII (US)  | Nested case-control | 1,828 (457 incident type 2 diabetes cases) | 19.0 years | <b>Platform: Broad Institute</b><br>LC-MS/MS; targeted (30 metabolites associated with coffee intake)                                                           | Plasma (Fasting)        | Age at blood draw, race, BMI, physical activity, alcohol consumption, smoking status, whole grain, fruit, vegetable, PUFA-to-SFA ratio, fish, red meat, SSB, total energy intake, multivitamin use, aspirin/NSAID use, family history of diabetes, menopausal status, menopausal hormone therapy | (↑) <b>DG</b> (34:1, 34:2, 34:3, 36:2, 36:3), TG (50:2, 50:3, 50:5, 50, 6 52:2, 52:3) (↓) <b>CE</b> (18:1, 18:2, 20:4)                                                                                                                                                                                                                                                                                                                                                                                                                                                                                                                                                         | 5.5 |

|                   |                       |                     |                                            |            |                                                                                                                                                                                                                                                                                                           |                  |                                                                                                                                                                                    |                                                                                                                                                                                                                                                                                                                                                                                                                                                     |     |
|-------------------|-----------------------|---------------------|--------------------------------------------|------------|-----------------------------------------------------------------------------------------------------------------------------------------------------------------------------------------------------------------------------------------------------------------------------------------------------------|------------------|------------------------------------------------------------------------------------------------------------------------------------------------------------------------------------|-----------------------------------------------------------------------------------------------------------------------------------------------------------------------------------------------------------------------------------------------------------------------------------------------------------------------------------------------------------------------------------------------------------------------------------------------------|-----|
| Liu et al. 2017   | ERF (Netherlands)     | Prospective cohort  | 2,564 (137 incident type 2 diabetes cases) | 11.3 years | <b>Platform: Netherland Metabolomics Center, Leiden; Center for Proteomics and Metabolomics, Leiden University Medical Center</b><br>LC-MS, NMR; targeted (261 metabolites including amino acids, triglycerides, glycerophospholipids, sphingolipids, ceramides, lipoprotein subfractions and components) | Plasma (Fasting) | Age, sex, lipid-lowering medication                                                                                                                                                | (↑) 2-hydroxybutyrate, 1,5-AG, 2-oxoglutaric acid, glycine betaine, glycerol, lactate, isoleucine, methionine, tyrosine, pyruvate, <b>TG</b> (48:0, 48:1, 50:5), <b>VLDL</b> (TG, FC in XXL particles), <b>LDL</b> (ApoB in XS particles) (↓) <b>LDL</b> (phospholipids, TG in XXL particle), <b>HDL</b> (FC in L particles)                                                                                                                        | 4.5 |
| Liu et al. 2019   | PREDIMED (Spain)      | Case-cohort         | 892 (251 incident type 2 diabetes cases)   | 3.8 years  | <b>Platform: Broad Institute</b><br>LC-MS/MS; targeted (2 metabolites: glutamate and glutamine)                                                                                                                                                                                                           | Plasma (Fasting) | Age, sex, BMI, smoking, leisure-time physical activity, dyslipidemia, hypertension, recruitment center baseline FG                                                                 | (↑) Glutamate (↓) Glutamine-to-glutamate ratio                                                                                                                                                                                                                                                                                                                                                                                                      | 5   |
| Lotta et al. 2016 | EPIC-Norfolk (UK)     | Case-cohort         | 1503 (673 incident type 2 diabetes cases)  | NA         | <b>Platform: Metabolon Inc.</b><br>UPLC-MS/MS; non-targeted (18 metabolites related to BCAA metabolism)                                                                                                                                                                                                   | Plasma (Fasting) | Age at baseline, sex, BMI, WC, ethnicity, educational attainment, family history of type 2 diabetes, smoking status, alcohol consumption, level of self-reported physical activity | (↑) 3-methyl-2-oxovalerate, 3-methyl-2-oxobutyrate, 3-hydroxy-2-ethylpropionate, 2-hydroxy-3-methylvalerate, 3-hydroxyisobutyrate α-hydroxyisovalerate, α-hydroxyisocaproate, isoleucine, leucine, valine, (↓) Isobutyrylcarnitine                                                                                                                                                                                                                  | 4   |
| Lu et al. 2016    | SCHS (Singapore)      | Nested case-control | 394 (197 incident type 2 diabetes cases)   | 6.0 years  | <b>Platform: In-house</b><br>UPLC-MS/MS, GC-MS/MS; non-targeted (>7000 metabolic features including amino acids, carbohydrates fatty acids, phospholipids and organic acids)                                                                                                                              | Serum (Mixed)    | BMI, smoking status, history of hypertension                                                                                                                                       | (↑) 1,3-propanediol, <b>AA</b> (aminomalonic acid, glycine, isoleucine, leucine, threonine, valine), <b>carbohydrates</b> (CDP glucose, galactose, gluconate), <b>FA</b> (palmitic, stearic, oleic, linoleic, lactic acid), pyruvate, urea, LPG 12:0, <b>LPI</b> (16:1, 18:1, 18:2, 20:3, 20:4, 22:6) (↓) <b>AA</b> (2-aminooctanoic acid, ornithine, phosphoserine, proline, serine), glycerol, 9-decenoylcarnitine, CMPF, <b>LPE</b> (20:3, 20:5) | 5   |
| Lu et al. 2018    | SCHS (Singapore)      | Nested case-control | 320 (160 incident type 2 diabetes cases)   | 6.0 years  | <b>Platform: In-house</b><br>HPLC-MS/MS; targeted (61 metabolites including LPI, fatty acids and acylcarnitines)                                                                                                                                                                                          | Serum (Mixed)    | BMI, history of hypertension, smoking, physical activity, fasting status, TG, HDL-C                                                                                                | (↑) <b>FA</b> (myristic, palmitic, palmitoleic, stearic, eicosadienoic, dihomogamma-linolenic, mead, arachidonic, adrenic), <b>LPI</b> (16:1, 18:0)                                                                                                                                                                                                                                                                                                 | 5   |
| Lu et al. 2019    | SCHS (Singapore)      | Nested case-control | 320 (160 incident type 2 diabetes cases)   | 6.0 years  | <b>Platform: In-house</b><br>HPLC-MS/MS; targeted (19 metabolites; amino acids)                                                                                                                                                                                                                           | Serum (Mixed)    | BMI, history of hypertension, smoking status, HDL-C, and TG                                                                                                                        | (↑) <b>AA</b> (valine, leucine, leucine, tryptophan, glutamic acid, tyrosine)                                                                                                                                                                                                                                                                                                                                                                       | 5   |
| Lu et al. 2019    | Jiading Study (China) | Nested case-control | 200 (100 incident type 2 diabetes cases)   | 4.4 years  | <b>Platform: In-house</b><br>HPLC-MS/MS; targeted                                                                                                                                                                                                                                                         | Serum (Fasting)  | Age, sex, BMI, smoking status, drinking status, education, physical                                                                                                                | (↑) <b>TG</b> (48:1, 48:2, 48:3, 50:0, 50:1, 50:2, 50:3, 51:0, 51:2, 51:3, 53:2, 53:3, 54:3, 54:4, 54:5,                                                                                                                                                                                                                                                                                                                                            | 4   |

|                        |                      |                     |                                            |            |                                                                                                                                                                                     |                  |                                                                                                                                 |                                                                                                                                                                                                                                                                                                                                                                                                            |     |
|------------------------|----------------------|---------------------|--------------------------------------------|------------|-------------------------------------------------------------------------------------------------------------------------------------------------------------------------------------|------------------|---------------------------------------------------------------------------------------------------------------------------------|------------------------------------------------------------------------------------------------------------------------------------------------------------------------------------------------------------------------------------------------------------------------------------------------------------------------------------------------------------------------------------------------------------|-----|
|                        | REACTION (China)     | Nested case-control | 724 (362 incident type 2 diabetes cases)   | 3.8 years  | (>800 metabolites including various lipid subclasses)                                                                                                                               |                  | activity, family history of diabetes, FPG, and SBP                                                                              | 54:6, 54:7, 55:6, 56:5, 56:6), CE 14:0, LPI 15:1, PC 34:3<br>(↓) PE plasmalogen 38:4                                                                                                                                                                                                                                                                                                                       |     |
| Mamtani et al. 2016    | SAFHS (US)           | Prospective cohort  | 771 (122 incident type 2 diabetes cases)   | 5.0 years  | <b>Platform: Metabolomics Laboratory, Baker IDI Heart and Diabetes Institute</b> LC-MS/MS; targeted (319 metabolites including various lipid subclasses)                            | Plasma (Fasting) | Age, sex, SBP, DBP, WC, BMI, total serum cholesterol, HDL-C, serum triglycerides, use of anti-lipid and anti-hypertensive drugs | (↑) <b>Cer</b> (d18:0/18:0, d18:0/22:0, d18:1/18:0), <b>TG</b> (48:0, 50:0, 50:1, 50:2, 52:1)<br>(↓) PE (36:1)                                                                                                                                                                                                                                                                                             | 5   |
| Merino et al. 2018     | FHS Offspring (US)   | Prospective cohort  | 1,150 (91 incident type 2 diabetes cases)  | 20.0 years | <b>Platform: Broad Institute</b> LC-MS/MS; targeted (220 metabolites including amino acids, carbohydrates, lipids and organic acids)                                                | Plasma (Fasting) | Age, sex, BMI, FG, fasting TG at baseline                                                                                       | (↑) 2-aminodipate, isocitrate, D-glucose, CE 20:3, DG 36:1, <b>TG</b> (48:1, 48:1, 52:1, 54:8, 58:11)                                                                                                                                                                                                                                                                                                      | 6   |
| Muilwijk et al. 2020   | HELIUS (Netherlands) | Case-cohort         | 763 (95 incident type 2 diabetes cases)    | 4.0 years  | <b>Platform: In-house</b> LC-MS/MS; targeted (58 metabolites including acylcarnitines amino acids and ceramides)                                                                    | Plasma (Fasting) | Age, sex, smoking, physical activity, BMI, WC                                                                                   | (↑) <b>AA</b> (alanine, glutamate, leucine, lysine, isoleucine, phenylalanine, proline), <b>Cer</b> (d17:1, d18:0, d18:1, d18:2, d20:1)<br>(↓) <b>AA</b> (glutamine, glycine), <b>acylcarnitine</b> (C2, C3DC, C4, C5DC, C6, C6DC, C12, C12OH, C12:1, C18, C18:1), <b>LacCer</b> (d18:1, d18:2)                                                                                                            | 4.5 |
| Noerman et al. 2019    | KIHD (Finland)       | Prospective cohort  | 2,682 (432 incident type 2 diabetes cases) | 19.3 years | <b>Platform: In-house</b> LC-MS/MS; non-targeted (>5300 metabolic features)                                                                                                         | Serum (Fasting)  | Unadjusted                                                                                                                      | (↑) 1,3-dimethylurate, caffeine, creatinine, piperine, <b>PC</b> (16:1/18:1, 14:0/16:1, 14:0/16:0, 16:0/22:2, 14:0/18:2), tyrosine<br>(↓) <b>Acylcarnitine</b> (16:2, 20:4), choline, DHA, glycerophosphocholine, lactic acid, linoleic acid, <b>LPC</b> (22:6, 20:1, 22:5, 20:4, 18:1, 17:1, 18:0, 20:2, 17:0, 16:1, 16:0, 20:5, 18:2, 19:1, O-18:1, O-18:0), <b>PC</b> (18:0/23:5, 16:0/24:4, 16:0/25:5) | 3.5 |
| Ottosson et al. 2018   | MPP (Sweden)         | Case-cohort         | 1,049 (204 incident type 2 diabetes cases) | 6.3 years  | <b>Platform: In-house</b> UPLC-MS/MS; non-targeted (1025 metabolic features)                                                                                                        | Plasma (Fasting) | Age, sex, analysis batch, FG, BMI, LDL-C, HDL-C, TG, SBP, antihypertensive treatment, smoking status                            | (↑) <b>AA</b> (glutamate, isoleucine, ornithine, leucine, lysine)<br>(↓) glutamine, asparagine                                                                                                                                                                                                                                                                                                             | 5.5 |
| Ottosson et al. 2019   | MPP (Sweden)         | Case-cohort         | 698 (202 incident type 2 diabetes cases)   | 6.3 years  | <b>Platform: In-house</b> UPLC-MS/MS; targeted (78 metabolites including phospholipids, peptides, purine metabolism, carnitine biosynthesis, urea cycle, and tryptophan metabolism) | Plasma (Fasting) | Age, sex, FG, BMI, SBP, fasting TG, HDL-C, LDL-C                                                                                | (↑) 7-methylguanine, creatinine, N <sub>2</sub> ,N <sub>2</sub> -dimethylguanosine, 3-hydroxytrimethyllysine, hypoxanthine, kynureate, N-acetylcarnosine, pantothenate, trimethyllysine, urea<br>(↓) β-carotene                                                                                                                                                                                            | 5.5 |
|                        | MDC (Sweden)         | Prospective cohort  | 3,423 (402 incident type 2 diabetes cases) | 18.2 years |                                                                                                                                                                                     |                  |                                                                                                                                 |                                                                                                                                                                                                                                                                                                                                                                                                            |     |
| Papandreou et al. 2018 | PREDIMED (Spain)     | Case-cohort         | 892 (251 incident type 2 diabetes cases)   | 3.8 years  | <b>Platform: Broad Institute</b> LC-MS/MS; targeted (16 metabolites related to TMAO metabolism)                                                                                     | Plasma (Fasting) | Age, sex, BMI, intervention group, baseline FG, smoking, leisure-time physical activity, dyslipidemia, hypertension             | (↓) α-glycerophosphocholine, betaine, choline, L-carnitine, <b>LPC</b> (16:0, 18:1, 18:0, 20:4, 22:6, 18:1), LPE 16:0, phosphocholine                                                                                                                                                                                                                                                                      | 5   |

|                         |                  |                     |                                            |            |                                                                                                                                                                                                                                              |                  |                                                                                                                                                                      |                                                                                                                                                                                                                                                                             |     |
|-------------------------|------------------|---------------------|--------------------------------------------|------------|----------------------------------------------------------------------------------------------------------------------------------------------------------------------------------------------------------------------------------------------|------------------|----------------------------------------------------------------------------------------------------------------------------------------------------------------------|-----------------------------------------------------------------------------------------------------------------------------------------------------------------------------------------------------------------------------------------------------------------------------|-----|
| Peddinti et al. 2017    | BPS (Finland)    | Case-cohort         | 543 (146 incident type 2 diabetes cases)   | 7.7 years  | <b>Platform: Metabolon Inc.</b> UHPLC-MS, GC-MS; non-targeted (542 metabolites) UHPLC-MS/MS; targeted (26 metabolites)                                                                                                                       | Serum (Fasting)  | Age, sex, BMI, fasting insulin level and family history at baseline.                                                                                                 | (↑) α-hydroxybutyric, <b>AA</b> (isoleucine, valine, glutamate), <b>carbohydrates</b> (glucose, mannose, trehalose)<br>(↓) α-tocopherol, bilirubin, glutamine, histamine                                                                                                    | 5   |
| Qiu et al. 2016         | DFTJ (China)     | Nested case-control | 2078 (1039 incident type 2 diabetes cases) | 4.6 years  | <b>Platform: School of Public Health, Tongji Medical College, Huazhong University of Science and Technology</b> HPLC-MS/MS; targeted (52 metabolites including amino acids, amines, acylcarnitines, cholines, indole and purine derivatives) | Plasma (Fasting) | Age, BMI, education level, smoking status, drinking status, physical activity, SBP, serum HDL-C and TG, FG, family history of diabetes, metabolomics batch           | (↑) <b>AA</b> (alanine, glutamate, leucine/isoleucine, ornithine, phenylalanine, proline, tyrosine, valine), palmitoylcarnitine, TMAO, inosine<br>(↓) α-glycerophosphocholine, acetylcholine, betaine, creatinine, indoleacetate                                            | 4.5 |
|                         | JSNCD (China)    | Nested case-control | 1040 (520 incident type 2 diabetes cases)  | 7.6 years  |                                                                                                                                                                                                                                              |                  |                                                                                                                                                                      |                                                                                                                                                                                                                                                                             |     |
| Razquin et al. 2019     | PREDIMED (Spain) | Case-cohort         | 853 (243 incident type 2 diabetes cases)   | 3.8 years  | <b>Platform: Broad Institute</b> LC-MS/MS; targeted (3 metabolites including 2-aminoadipic, lysine and pipecolic acid)                                                                                                                       | Plasma (Fasting) | Age, sex and intervention, BMI, smoking, dyslipidemia, hypertension, baseline FPG                                                                                    | (↑) 2-aminoadipic acid, lysine                                                                                                                                                                                                                                              | 5   |
| Reboholz et al. 2018    | ARIC (US)        | Prospective cohort  | 2939 (1126 incident type 2 diabetes cases) | 20.0 years | <b>Platform: Metabolon Inc.</b> UPLC-MS/MS; non-targeted (245 metabolites including amino acids, carbohydrates, lipids, nucleotides, peptides and xenobiotics)                                                                               | Serum (Fasting)  | Age, sex, race, centre, batch, education level, SBP, DBP, BMI, HDL-C, LDL-C, smoking status, physical activity level, history of cardiovascular disease, eGFR and FG | (↑) isoleucine, leucine, valine, 3-(4-hydroxyphenyl)lactate, trehalose, erythritol<br>(↓) asparagine                                                                                                                                                                        | 5   |
| Salvalainen et al. 2017 | GS (Sweden)      | Nested case-control | 391 (69 incident type 2 diabetes cases)    | 5.5 years  | <b>Platform: In-house</b> GC-MS/MS; non-targeted (10 metabolites including alkylresorcinols, fatty acids and tocopherols)                                                                                                                    | Plasma (Fasting) | Unadjusted                                                                                                                                                           | (↓) α-tocopherol, CMPF                                                                                                                                                                                                                                                      | 3   |
| Shi et al. 2018         | VIP (Sweden)     | Nested case-control | 842 (421 incident type 2 diabetes cases)   | 7.0 years  | <b>Platform: In-house</b> LC-MS/MS; non-targeted (>29,000 metabolic features)                                                                                                                                                                | Plasma (Fasting) | Smoking status, education, physical activity at diet assessment, daily energy intake, FPG, BMI, TC, TG, SBP, DBP                                                     | No significant associations                                                                                                                                                                                                                                                 | 5   |
| Shi et al. 2018         | VIP (Sweden)     | Nested case-control | 1006 (503 incident type 2 diabetes cases)  | 7.0 years  | <b>Platform: In-house</b> LC-MS/MS; non-targeted (>29,000 metabolic features)                                                                                                                                                                | Plasma (Fasting) | FPG, BMI, physical activity, education, smoking, consumption of alcohol intake, dietary fiber, red and processed meat intake, TC, TG, SBP, DBP                       | (↑) 3-methyl-2-oxovaleric acid, 3-hydroxyisovaleryl carnitine, <b>AA</b> (alanine, citrulline, isoleucine, leucine, tryptophan, tyrosine)<br>(↓) 2-Hydroxyethanesulfonate, N-acetyl glycine, <b>LPC</b> (19:1, 17:0, 20:1, p-16:0, 16:0, 18:2, 18:1), <b>PC</b> (17:0/18:2) | 5   |
| Shi et al. 2019         | VIP (Sweden)     | Nested case-control | 842 (421 incident type 2 diabetes cases)   | 7.0 years  | <b>Platform: In-house</b> LC-MS/MS; non-targeted (>29,000 metabolic features)                                                                                                                                                                | Plasma (Fasting) | BMI, smoking status, education, physical activity, and daily energy intake                                                                                           | (↑) Eicosapentaenoic acid<br>(↓) LPE 18:2                                                                                                                                                                                                                                   | 5   |

|                         |                     |                     |                                            |           |                                                                                                                                                                             |                             |                                                                                                                                                                                        |                                                                                                                                                                                                                                              |     |
|-------------------------|---------------------|---------------------|--------------------------------------------|-----------|-----------------------------------------------------------------------------------------------------------------------------------------------------------------------------|-----------------------------|----------------------------------------------------------------------------------------------------------------------------------------------------------------------------------------|----------------------------------------------------------------------------------------------------------------------------------------------------------------------------------------------------------------------------------------------|-----|
| Shi et al. 2019         | VIP (Sweden)        | Nested case-control | 842 (421 incident type 2 diabetes cases)   | 7.0 years | <b>Platform: In-house</b> LC-MS/MS; non-targeted (>29,000 metabolic features)                                                                                               | Plasma (Fasting)            | BMI, FPG, smoking status, education, physical activity, total daily energy, Baltic Sea Diet Score                                                                                      | (↑) Caffeine, Cyclo(leucylprolyl) peptide, ethyl 3-mercaptopropanoic acid, PE 20:4/16:0<br>(↓) 7-hydroxy-4-(methoxymethyl)coumarin                                                                                                           | 5   |
| Strand et al. 2018      | WENBIT+ (Norway)    | Prospective cohort  | 2,519 (173 incident type 2 diabetes cases) | 7.7 years | <b>Platform: In-house</b> LC-MS/MS; targeted (8 metabolites related to carnitine metabolism)                                                                                | Serum (Mixed)               | Age, sex, fasting status, BMI, eGFR, HbA1c, TG, HDL-C, study center                                                                                                                    | (↑) trimethyllysine, γ-butyrobetaine, acylcarnitine C16                                                                                                                                                                                      | 4   |
| Sun et al. 2016         | NHAPC (China)       | Prospective cohort  | 2,103 (507 incident type 2 diabetes cases) | 6.0 years | <b>Platform: In-house</b> LC-MS/MS; targeted (34 metabolites; acylcarnitines)                                                                                               | Plasma (Fasting)            | Age, sex, geographical region, residence, current smoking, drinking, physical activity, family history of diabetes, BMI, SBP, FG, HbA1c                                                | (↑) Carnitine, <b>acylcarnitines</b> (C3DC, C8:1, C16:2, C18, C18:OH, C18:1, C18:2, C20, C20:4)<br>(↓) <b>Carnitine precursors</b> (3-dehydroxycarnitine, 3-dehydrocarnitine)<br><b>acylcarnitines</b> (C10DC, C12DC, C12, C12OH, C12:1)     | 5.5 |
| Svingen et al. 2016     | WENBIT+ (Norway)    | Prospective cohort  | 3,621 (233 incident type 2 diabetes cases) | 7.5 years | <b>Platform: In-house</b> LC-MS/MS, GC-MS/MS; targeted (5 metabolites related to choline metabolism)                                                                        | Plasma/serum (Mixed), Urine | Age, sex, fasting status, BMI, HbA1c, eGFR, HDL-C, albumin-to-creatinine ratio, use of loop diuretics, thiazides, b-blockers, statins, ACE inhibitors, angiotensin receptor blockers   | (↑) <b>Urine</b> (betaine, dimethylglycine, sarcosine)<br>(↓) Plasma betaine                                                                                                                                                                 | 4.5 |
| Vangipurapu et al. 2019 | METSIM (Finland)    | Prospective cohort  | 4,851 (522 incident type 2 diabetes cases) | 7.4 years | <b>Platform: Metabolon Inc.</b> UPLC-MS/MS; non-targeted (20 metabolites: amino acids)                                                                                      | Plasma (Fasting)            | Batch                                                                                                                                                                                  | (↑) <b>AA</b> (tyrosine, alanine, isoleucine, aspartate, glutamate)                                                                                                                                                                          | 3.5 |
| Vangipurapu et al. 2020 | METSIM (Finland)    | Prospective cohort  | 4,851 (522 incident type 2 diabetes cases) | 7.4 years | <b>Platform: Metabolon Inc.</b> UHPLC-MS/MS; non-targeted (86 metabolites related to gut microbiota)                                                                        | Plasma (Fasting)            | Batch                                                                                                                                                                                  | (↑) creatine, dimethylglycine, kynurenate, urate, xanthine, xanthurenate, 3-(4-hydroxyphenyl) propionate, 2-hydroxyhippurate, 2-hydroxybutyrate, <b>MG</b> (14:0, 18:1, 16:1)<br>(↓) LPC 18:2                                                | 3.5 |
| Yang et al. 2018        | KoGES (South Korea) | Prospective cohort  | 1,939 (282 incident type 2 diabetes cases) | 8.0 years | <b>Platform: Biocrates</b> FIA-MS/MS, LC-MS/MS; targeted (135 metabolites: acylcarnitines, amino acids, biogenic amines, hexose, glycerophospholipids, sphingolipids)       | Serum (Fasting)             | Age, sex, BMI, educational level, household income, smoking status, drinking status, METs, total energy, consumptions of coffee, red meat and whole grain, and history of hypertension | (↑) <b>AA</b> (alanine, arginine, isoleucine, proline, tyrosine, valine, hexose), <b>PC</b> (32:1, 34:1, 36:1, 40:5, 42:5)<br>(↓) Spermine, <b>LPC</b> (17:0, 18:2), <b>PC</b> (38:0, 40:1, 42:1, O-34:3, O-36:3), <b>SM</b> (16:1, OH-22:2) | 4.5 |
| Yu et al. 2016          | SWHS, SMHS (China)  | Prospective cohort  | 976 (73 incident type 2 diabetes cases)    | NA        | <b>Platform: Metabolon Inc.</b> LC-MS/MS, GC-MS/MS; non-targeted (>1300 metabolic features: carbohydrates, amino acids, other organic acids, lipids, nucleotides, peptides) | Plasma (Mixed)              | Age, sex, smoking, waist circumference, history of hypertension, time of blood draw, time interval since last meal, and assay batch                                                    | (↑) <b>Carbohydrates</b> (1,5-AG, glucose, fructose, mannose), 2-hydroxybutyrate, 2-amimobutyrate, 2-ketobutyrate, glycine, 3-methoxytyrosine                                                                                                | 3.5 |



|                 |                  |                    |                                            |           |                                                                                                                                   |                  |                                                                                                                                            |                                                                                                                                                                        |   |
|-----------------|------------------|--------------------|--------------------------------------------|-----------|-----------------------------------------------------------------------------------------------------------------------------------|------------------|--------------------------------------------------------------------------------------------------------------------------------------------|------------------------------------------------------------------------------------------------------------------------------------------------------------------------|---|
| Yu et al. 2018  | PREDIMED (Spain) | Case-cohort        | 892 (251 incident type 2 diabetes cases)   | 3.8 years | <b>Platform: Broad Institute</b> LC-MS/MS; targeted (5 metabolites including tryptophan–kynurenine metabolites)                   | Plasma (Fasting) | Age, sex, intervention group, BMI, smoking, leisure-time physical activity, dyslipidemia, hypertension baseline FG                         | (↑) Quinolinic acid (1-year change)                                                                                                                                    | 5 |
| Yu et al. 2019  | PREDIMED (Spain) | Case-cohort        | 892 (251 incident type 2 diabetes cases)   | 3.8 years | <b>Platform: Broad Institute</b> LC-MS/MS; targeted (6 metabolites including urea cycle and methylarginines)                      | Plasma (Fasting) | Age, sex, intervention group, BMI, smoking, leisure-time physical activity, dyslipidaemia, hypertension, baseline FG, plasma creatinine    | (↓) Arginine (1-year change)                                                                                                                                           | 5 |
| Yun et al. 2020 | NHAPC (China)    | Prospective cohort | 1,974 (529 incident type 2 diabetes cases) | 6.0 years | <b>Platform: In-house</b> LC-MS/MS; targeted (76 metabolites from lipid classes: ceramides, sphingomyelins and their derivatives) | Plasma (Fasting) | Age, sex, region, residence, educational attainment, current smoking, alcohol drinking, physical activity, family history of diabetes, BMI | (↑) <b>Cer</b> (d18:1/18:1, d18:1/20:0, d18:1/20:1, d18:1/22:1), <b>HexCer</b> d18:1/20:1, <b>SM</b> (34:0, 34:1, (2OH) 34:1, 36:0, 36:1, 38:0, (OH) 38:3, 40:0. 42:3) | 5 |

(↑) – positive association (i.e. higher metabolite, higher risk), (↓) – negative association (i.e. lower metabolite, lower risk), ACE – angiotensin-converting enzyme, AHEI – Alternate Healthy Eating Index BMI – body mass index, (S/D)BP – Systolic/diastolic blood pressure, F(P)G – fasting (plasma) glucose, HbA1c – glycated hemoglobin, eGFR – estimated glomerular filtration rate, HDL-C – high-density lipoprotein cholesterol, HOMA-IR – homeostatic model assessment for insulin resistance, LDL-C – low density lipoprotein cholesterol, NSAID – non-steroidal anti-inflammatory drugs, PUFA – polyunsaturated fatty acids, SFA – saturated fatty acids, SSB – sugar-sweetened beverages, TC – total cholesterol, WC – waist circumference.

**Metabolite abbreviations:** 1,5-AG – 1,5-Anhydroglucitol, (BC/A)AA – (branched-chain/aromatic) amino acids, CE – cholesteryl esters, Cer – ceramides, CMPF - 3-Carboxy-4-methyl-5-propyl-2-furanpropanoic acid, DG – diglycerides, (H/I/L/VL)DL – (high/intermediate/low/very low) density lipoprotein, FA – fatty acids, LPI – lysophosphatidylinositol, (L)PC(P) – (lyso)phosphatidylcholine (plasmalogen), (L)PE – (lyso)phosphatidylethanolamine, SM – sphingomyelin, TG – triglycerides, TMAO – trimethylamine N-oxide.

**Methods abbreviations:** GC – gas chromatography, FIA – flow injection analysis, (HP/UP/UHP)LC – high/ultra/ultra-high performance liquid chromatography, MS – mass spectrometry, MS/MS – tandem mass spectrometry.

**Study abbreviations:** ARIC - Atherosclerosis Risk in Communities, BioDIVA – Biomarker Discovery Project in High Grade Serous Ovarian Cancer, BPS - Botnia Prospective Study, DFTJ - Dongfeng-Tongji Cohort, DILGOM - Dietary, Lifestyle, and Genetic Determinants of Obesity and Metabolic Syndrome, DPP - Diabetes Prevention Program, EPIC - European Prospective Investigation into Cancer and Nutrition, FHS – Framingham Heart Study, ERF - Erasmus Rucphen Family Study, FDPS - Finnish Diabetes Prevention Study, GS - Gothenburg Study, HCHS/SOL – Hispanic Community Health Study / Study of Latinos, HELIUS – Healthy Life in an Urban Setting, HUNT - Nord-Trøndelag Health Study, JSNCD - Jiangsu Noncommunicable Disease Cohort, KIHD – Kuopio Ischaemic Heart Disease Risk Factor Study, KoGES - Korean Genome and Epidemiology Study, KORA - Cooperative Health Research in the Region of Augsburg, MDC - Malmö Diet and Cancer, MPP – Malmö Preventive Project, METSIM – Metabolic Syndrome in Men, NFBC - Northern Finland Birth Cohort, NHAPC - Nutrition and Health of Aging Population in China, NHS – Nurses' Health Study, PIVUS - Prospective Investigation of the Vasculature in Uppsala Seniors, PREDIMED - Prevención con Dieta Mediterránea, REACTION - Risk Evaluation of Cancers in Chinese Diabetic Individuals, SAFHS – San Antonio Family Heart Study, SCHS – Singapore Chinese Health Study, SHDS – Shanghai Diabetes Study, SHIP - Study of Health in Pomerania, SMHS – Shanghai Men's Health Study, SMEC – Singapore Multi-Ethnic Cohort, SP2 – Singapore Prospective Study, SWHS – Shanghai Women's Health Study, ULSAM - Uppsala Longitudinal Study of Adult Men, VIP – Västerbotten Intervention Programme, YFS - Cardiovascular Risk in Young Finns Study, WENBIT – Western Norway Vitamin B Trial.

**Study quality assessment:** Study quality was assessed using 6 criteria (up to 1 point per criterion), including participation (1 point if characteristics of the study population were described and inclusion and exclusion criteria reported and if there was a record of sampling, period, and location of recruitment), attrition (1 point if completeness of follow-up described and adequate), exposure characteristics (1 point if description of metabolomics method and metabolites analyzed), validated outcome (1 point if criteria for diabetes/prediabetes were defined), control of confounding (1 point if the models were adjusted at least for age, sex, BMI, and fasting glucose), and analysis (1 point if risk estimate determination and statistical approaches were appropriate for study design and multiple comparison testing was applied). Scores were summed; studies with scores <3 and ≥3 were considered to be of lower and higher quality, respectively.

**Supplementary Table 7.** Pooled relative risk for the association between study specific 1-SD increase in metabolite level and risk of incident type 2 diabetes.

| No.                                                 | Compound                    | HMDB/ChEBI ID           | N  | SRR (95% CI)      | P                | P-FDR            | I <sup>2</sup> | τ <sup>2</sup> |
|-----------------------------------------------------|-----------------------------|-------------------------|----|-------------------|------------------|------------------|----------------|----------------|
| <b>BCAA metabolism</b>                              |                             |                         |    |                   |                  |                  |                |                |
| 1                                                   | 2-hydroxy-3-methylbutyrate  | HMDB00407               | 3  | 1.18 (1.04; 1.34) | <b>0.008</b>     | <b>0.029</b>     | 0              | 0.000          |
| 2                                                   | 2-hydroxyisocaproate        | HMDB00746               | 3  | 1.22 (1.06; 1.39) | <b>0.004</b>     | <b>0.017</b>     | 0              | 0.000          |
| 3                                                   | 3-hydroxy-2-ethylpropionate | HMDB00396               | 2  | 1.36 (1.20; 1.55) | <b>&lt;0.001</b> | <b>&lt;0.001</b> | 0              | 0.000          |
| 4                                                   | 3-hydroxyisobutyrate        | HMDB00023               | 5  | 1.36 (1.18; 1.56) | <b>&lt;0.001</b> | <b>&lt;0.001</b> | 69             | 0.016          |
| 5                                                   | 3-hydroxyisovalerate        | HMDB00754               | 2  | 1.19 (1.04; 1.37) | <b>0.011</b>     | <b>0.037</b>     | 0              | 0.000          |
| 6                                                   | 3-methyl-2-oxobutyrate      | HMDB00019               | 6  | 1.49 (1.05; 2.11) | <b>0.024</b>     | 0.072            | 93             | 0.167          |
| 7                                                   | 3-methyl-2-oxovalerate      | HMDB00491               | 6  | 1.53 (1.06; 2.20) | <b>0.022</b>     | 0.067            | 94             | 0.186          |
| 8                                                   | 4-methyl-2-oxopentanoate    | HMDB00695               | 4  | 1.48 (0.98; 2.24) | 0.065            | 0.153            | 90             | 0.157          |
| 9                                                   | Isoleucine                  | HMDB00172               | 19 | 1.54 (1.36; 1.74) | <b>&lt;0.001</b> | <b>&lt;0.001</b> | 88             | 0.058          |
| 10                                                  | Leucine                     | HMDB00687               | 23 | 1.40 (1.29; 1.52) | <b>&lt;0.001</b> | <b>&lt;0.001</b> | 74             | 0.027          |
| 11                                                  | Valine                      | HMDB00883               | 19 | 1.40 (1.25; 1.57) | <b>&lt;0.001</b> | <b>&lt;0.001</b> | 86             | 0.047          |
| <b>AAA metabolism</b>                               |                             |                         |    |                   |                  |                  |                |                |
| 12                                                  | 3-(4-hydroxyphenyl)lactate  | HMDB00755               | 2  | 1.35 (1.01; 1.81) | <b>0.046</b>     | 0.119            | 67             | 0.030          |
| 13                                                  | 3-methoxytyrosine           | HMDB01434               | 3  | 0.81 (0.61; 1.07) | 0.134            | 0.258            | 68             | 0.042          |
| 14                                                  | 4-hydroxyphenylpyruvate     | HMDB00707               | 2  | 1.17 (0.82; 1.66) | 0.396            | 0.538            | 79             | 0.053          |
| 15                                                  | Benzoate                    | HMDB01870               | 3  | 0.97 (0.88; 1.07) | 0.569            | 0.687            | 8              | 0.001          |
| 16                                                  | Hippurate                   | HMDB00714               | 9  | 0.97 (0.89; 1.06) | 0.466            | 0.601            | 64             | 0.010          |
| 17                                                  | Hydrocinnamate              | HMDB00764               | 3  | 0.86 (0.80; 0.93) | <b>&lt;0.001</b> | <b>&lt;0.001</b> | 0              | 0.000          |
| 18                                                  | Phenylalanine               | HMDB00159               | 18 | 1.30 (1.16; 1.45) | <b>&lt;0.001</b> | <b>&lt;0.001</b> | 87             | 0.044          |
| 19                                                  | Tyrosine                    | HMDB00158               | 18 | 1.35 (1.22; 1.49) | <b>&lt;0.001</b> | <b>&lt;0.001</b> | 81             | 0.031          |
| <b>Alanine, aspartate, and glutamate metabolism</b> |                             |                         |    |                   |                  |                  |                |                |
| 20                                                  | Alanine                     | HMDB00161               | 21 | 1.32 (1.20; 1.44) | <b>&lt;0.001</b> | <b>&lt;0.001</b> | 79             | 0.030          |
| 21                                                  | Asparagine                  | HMDB00168               | 8  | 1.03 (0.82; 1.29) | 0.817            | 0.885            | 95             | 0.099          |
| 22                                                  | Aspartic acid               | HMDB00191               | 6  | 1.13 (1.00; 1.28) | 0.060            | 0.146            | 78             | 0.016          |
| 23                                                  | Glutamate                   | HMDB00148               | 13 | 1.38 (1.20; 1.60) | <b>&lt;0.001</b> | <b>&lt;0.001</b> | 91             | 0.058          |
| 24                                                  | Glutamine                   | HMDB00641               | 19 | 0.84 (0.75; 0.94) | <b>0.002</b>     | <b>0.011</b>     | 89             | 0.051          |
| <b>Arginine and proline metabolism, Urea cycle</b>  |                             |                         |    |                   |                  |                  |                |                |
| 25                                                  | Arginine                    | HMDB00517               | 13 | 1.00 (0.91; 1.11) | 0.965            | 0.988            | 81             | 0.024          |
| 26                                                  | Citrulline                  | HMDB00904               | 12 | 1.00 (0.94; 1.06) | 0.997            | 0.998            | 31             | 0.003          |
| 27                                                  | Creatinine                  | HMDB00562               | 13 | 0.98 (0.89; 1.09) | 0.736            | 0.835            | 72             | 0.022          |
| 28                                                  | Hydroxyproline              | HMDB00725               | 3  | 1.04 (0.96; 1.12) | 0.324            | 0.469            | 0              | 0.000          |
| 29                                                  | NMMA                        | HMDB29416               | 4  | 1.01 (0.88; 1.16) | 0.851            | 0.906            | 67             | 0.012          |
| 30                                                  | Ornithine                   | HMDB00214               | 13 | 1.06 (0.97; 1.17) | 0.212            | 0.358            | 72             | 0.018          |
| 31                                                  | Proline                     | HMDB00162               | 2  | 1.65 (0.84; 3.23) | 0.148            | 0.278            | 95             | 0.226          |
| 32                                                  | SDMA+ADMA                   | HMDB03334/<br>HMDB01539 | 10 | 0.97 (0.92; 1.02) | 0.206            | 0.353            | 0              | 0.000          |
| 33                                                  | Urea                        | HMDB00294               | 5  | 1.18 (0.97; 1.44) | 0.102            | 0.213            | 86             | 0.041          |
| 34                                                  | Xanthine                    | HMDB00292               | 3  | 1.11 (0.92; 1.34) | 0.295            | 0.438            | 87             | 0.023          |

|                                                  |                    |            |    |                   |              |              |    |       |
|--------------------------------------------------|--------------------|------------|----|-------------------|--------------|--------------|----|-------|
| <b>Beta-alanine metabolism</b>                   |                    |            |    |                   |              |              |    |       |
| 35                                               | Beta-alanine       | HMDB000056 | 2  | 0.92 (0.83; 1.01) | 0.089        | 0.192        | 0  | 0.000 |
| 36                                               | Pantothenate       | HMDB000210 | 6  | 1.06 (0.92; 1.23) | 0.404        | 0.548        | 79 | 0.025 |
| <b>Glycine, serine, and threonine metabolism</b> |                    |            |    |                   |              |              |    |       |
| 37                                               | 2-hydroxybutyrate  | HMDB000008 | 8  | 1.45 (1.24; 1.70) | <0.001       | <0.001       | 85 | 0.040 |
| 38                                               | 2-ketobutyrate     | HMDB000005 | 2  | 1.28 (0.65; 2.53) | 0.483        | 0.614        | 91 | 0.221 |
| 39                                               | 3-hydroxypyruvate  | HMDB01352  | 2  | 1.29 (0.80; 2.08) | 0.287        | 0.430        | 83 | 0.098 |
| 40                                               | Creatine           | HMDB000064 | 5  | 1.08 (0.91; 1.28) | 0.381        | 0.528        | 87 | 0.031 |
| 41                                               | Glycine            | HMDB00123  | 18 | 0.79 (0.68; 0.90) | <b>0.001</b> | <b>0.003</b> | 89 | 0.071 |
| 42                                               | N-acetylglycine    | HMDB00532  | 4  | 0.82 (0.67; 1.00) | <b>0.045</b> | 0.119        | 72 | 0.028 |
| 43                                               | Sarcosine          | HMDB00271  | 4  | 1.01 (0.94; 1.08) | 0.832        | 0.895        | 0  | 0.000 |
| 44                                               | Serine             | HMDB00187  | 12 | 0.92 (0.83; 1.02) | 0.130        | 0.256        | 80 | 0.023 |
| 45                                               | Threonine          | HMDB00167  | 9  | 1.01 (0.96; 1.05) | 0.796        | 0.872        | 0  | 0.000 |
| <b>Histidine metabolism</b>                      |                    |            |    |                   |              |              |    |       |
| 46                                               | Histamine          | HMDB000870 | 3  | 1.06 (0.94; 1.18) | 0.332        | 0.473        | 56 | 0.006 |
| 47                                               | Histidine          | HMDB00177  | 17 | 0.95 (0.90; 1.01) | 0.111        | 0.227        | 55 | 0.008 |
| <b>Lysine metabolism</b>                         |                    |            |    |                   |              |              |    |       |
| 48                                               | 2-aminoadipate     | HMDB000510 | 3  | 1.33 (1.18; 1.51) | <0.001       | <0.001       | 0  | 0.000 |
| 49                                               | Lysine             | HMDB00182  | 11 | 1.10 (1.05; 1.15) | <0.001       | <0.001       | 0  | 0.000 |
| <b>Methionine metabolism</b>                     |                    |            |    |                   |              |              |    |       |
| 50                                               | 2-aminobutyrate    | HMDB000452 | 2  | 1.53 (1.04; 2.27) | <b>0.032</b> | 0.092        | 77 | 0.062 |
| 51                                               | Methionine         | HMDB000696 | 12 | 1.10 (1.04; 1.17) | <b>0.001</b> | <b>0.006</b> | 46 | 0.005 |
| 52                                               | Putrescine         | HMDB01414  | 2  | 0.95 (0.87; 1.04) | 0.250        | 0.403        | 0  | 0.000 |
| 53                                               | Spermidine         | HMDB01257  | 3  | 0.90 (0.84; 0.96) | <b>0.002</b> | <b>0.007</b> | 0  | 0.000 |
| <b>Taurine and hypotaurine metabolism</b>        |                    |            |    |                   |              |              |    |       |
| 54                                               | Taurine            | HMDB000251 | 6  | 0.96 (0.83; 1.12) | 0.638        | 0.741        | 89 | 0.031 |
| <b>Tryptophan Metabolism</b>                     |                    |            |    |                   |              |              |    |       |
| 55                                               | Indoleacetate      | HMDB00197  | 4  | 0.92 (0.79; 1.07) | 0.268        | 0.411        | 70 | 0.014 |
| 56                                               | Indolelactate      | HMDB000671 | 3  | 1.13 (1.06; 1.21) | <0.001       | <b>0.001</b> | 0  | 0.000 |
| 57                                               | Indolepropionate   | HMDB02302  | 8  | 0.82 (0.74; 0.92) | <0.001       | <0.001       | 67 | 0.014 |
| 58                                               | Kynurenate         | HMDB000715 | 4  | 1.25 (0.90; 1.74) | 0.188        | 0.333        | 95 | 0.104 |
| 59                                               | Kynurenine         | HMDB000684 | 6  | 1.00 (0.88; 1.13) | 0.998        | 0.998        | 76 | 0.017 |
| 60                                               | Quinolate          | HMDB000232 | 2  | 0.98 (0.89; 1.08) | 0.642        | 0.741        | 0  | 0.000 |
| 61                                               | Serotonin          | HMDB000259 | 4  | 1.04 (0.89; 1.21) | 0.642        | 0.741        | 90 | 0.023 |
| 62                                               | Tryptophan         | HMDB000929 | 14 | 1.14 (0.99; 1.30) | 0.065        | 0.153        | 88 | 0.054 |
| <b>Glycolysis/gluconeogenesis and TCA cycle</b>  |                    |            |    |                   |              |              |    |       |
| 63                                               | 2-hydroxyglutarate | HMDB59655  | 2  | 1.06 (0.97; 1.16) | 0.223        | 0.369        | 17 | 0.002 |
| 64                                               | Citrate            | HMDB000193 | 6  | 0.95 (0.87; 1.04) | 0.244        | 0.399        | 0  | 0.000 |
| 65                                               | Fumarate           | HMDB000134 | 3  | 0.94 (0.84; 1.05) | 0.266        | 0.411        | 21 | 0.002 |
| 66                                               | Glycerol           | HMDB000131 | 9  | 1.11 (0.88; 1.40) | 0.365        | 0.510        | 91 | 0.091 |
| 67                                               | Isocitrate         | HMDB000193 | 2  | 1.35 (1.00; 1.84) | 0.052        | 0.130        | 82 | 0.040 |
| 68                                               | Lactate            | HMDB000190 | 12 | 1.16 (1.01; 1.34) | <b>0.034</b> | 0.096        | 86 | 0.047 |

|                                               |                        |           |    |                   |                  |                  |    |       |
|-----------------------------------------------|------------------------|-----------|----|-------------------|------------------|------------------|----|-------|
| 69                                            | Malate                 | HMDB00156 | 4  | 1.04 (0.97; 1.13) | 0.270            | 0.411            | 0  | 0.000 |
| 70                                            | Oxoglutarate           | HMDB00208 | 4  | 1.30 (0.85; 1.97) | 0.223            | 0.369            | 93 | 0.165 |
| 71                                            | Pyruvate               | HMDB00243 | 11 | 1.24 (1.10; 1.40) | <b>&lt;0.001</b> | <b>0.003</b>     | 74 | 0.027 |
| 72                                            | Succinate              | HMDB00254 | 4  | 1.02 (0.98; 1.07) | 0.352            | 0.495            | 0  | 0.000 |
| <b>Ketone body metabolism</b>                 |                        |           |    |                   |                  |                  |    |       |
| 73                                            | 3-hydroxybutyrate      | HMDB00011 | 9  | 1.17 (0.98; 1.39) | 0.074            | 0.169            | 83 | 0.054 |
| 74                                            | Acetoacetate           | HMDB00060 | 7  | 1.12 (0.99; 1.26) | 0.071            | 0.163            | 56 | 0.013 |
| <b>Mono-, di- and oligosaccharides</b>        |                        |           |    |                   |                  |                  |    |       |
| 75                                            | 1,5-anhydrosorbitol    | HMDB02712 | 5  | 0.81 (0.54; 1.21) | 0.311            | 0.458            | 96 | 0.195 |
| 76                                            | Fructose               | HMDB00660 | 3  | 1.33 (0.89; 1.98) | 0.169            | 0.311            | 84 | 0.105 |
| 77                                            | Gluconate              | HMDB00625 | 5  | 1.27 (1.04; 1.56) | <b>0.020</b>     | 0.064            | 66 | 0.030 |
| 78                                            | Glucose                | HMDB00122 | 4  | 2.53 (1.09; 5.87) | <b>0.031</b>     | 0.089            | 97 | 0.699 |
| 79                                            | Mannitol               | HMDB00765 | 2  | 0.65 (0.29; 1.46) | 0.295            | 0.438            | 84 | 0.290 |
| 80                                            | Mannose                | HMDB00169 | 3  | 2.58 (1.59; 4.20) | <b>&lt;0.001</b> | <b>0.001</b>     | 87 | 0.157 |
| 81                                            | Trehalose              | HMDB00975 | 2  | 1.17 (1.09; 1.25) | <b>&lt;0.001</b> | <b>&lt;0.001</b> | 0  | 0.000 |
| <b>Ascorbate and aldarate metabolism</b>      |                        |           |    |                   |                  |                  |    |       |
| 82                                            | Threonate              | HMDB00943 | 2  | 0.86 (0.65; 1.15) | 0.312            | 0.458            | 60 | 0.025 |
| <b>Choline metabolism</b>                     |                        |           |    |                   |                  |                  |    |       |
| 83                                            | Betaine                | HMDB00043 | 10 | 0.82 (0.76; 0.89) | <b>&lt;0.001</b> | <b>&lt;0.001</b> | 49 | 0.007 |
| 84                                            | Choline                | HMDB00097 | 9  | 0.94 (0.85; 1.04) | 0.234            | 0.384            | 72 | 0.016 |
| 85                                            | Dimethylglycine        | HMDB00092 | 7  | 1.04 (0.92; 1.17) | 0.549            | 0.669            | 90 | 0.020 |
| 86                                            | Trimethylamine N-oxide | HMDB00925 | 8  | 1.07 (1.00; 1.14) | 0.065            | 0.153            | 48 | 0.004 |
| <b>Inositol metabolism</b>                    |                        |           |    |                   |                  |                  |    |       |
| 87                                            | Myo-inositol           | HMDB00211 | 2  | 0.85 (0.68; 1.07) | 0.177            | 0.317            | 14 | 0.004 |
| <b>Methylxanthine metabolism</b>              |                        |           |    |                   |                  |                  |    |       |
| 88                                            | 1-methylurate          | HMDB03099 | 2  | 0.95 (0.81; 1.11) | 0.491            | 0.619            | 0  | 0.000 |
| 89                                            | 1,3-dimethylurate      | HMDB01857 | 2  | 1.25 (0.97; 1.59) | 0.079            | 0.178            | 45 | 0.014 |
| 90                                            | Caffeine               | HMDB01847 | 4  | 1.17 (0.95; 1.44) | 0.132            | 0.257            | 63 | 0.028 |
| 91                                            | Hypoxanthine           | HMDB00725 | 6  | 1.11 (0.95; 1.29) | 0.198            | 0.343            | 83 | 0.029 |
| 92                                            | Paraxanthine           | HMDB01860 | 2  | 0.99 (0.85; 1.15) | 0.870            | 0.921            | 0  | 0.000 |
| 93                                            | Theobromine            | HMDB02825 | 2  | 0.98 (0.68; 1.41) | 0.896            | 0.935            | 78 | 0.055 |
| 94                                            | Theophylline           | HMDB01889 | 2  | 1.14 (0.97; 1.35) | 0.122            | 0.242            | 0  | 0.000 |
| <b>Nicotinate and nicotinamide metabolism</b> |                        |           |    |                   |                  |                  |    |       |
| 95                                            | 1-methylnicotinamide   | HMDB00699 | 2  | 1.00 (0.90; 1.11) | 0.973            | 0.988            | 30 | 0.002 |
| 96                                            | Cotinine               | HMDB01046 | 3  | 1.11 (0.98; 1.25) | 0.117            | 0.231            | 52 | 0.007 |
| 97                                            | Niacinamide            | HMDB01406 | 5  | 1.04 (0.89; 1.21) | 0.640            | 0.739            | 81 | 0.025 |
| 98                                            | Trigonelline           | HMDB00875 | 2  | 0.98 (0.83; 1.16) | 0.803            | 0.882            | 0  | 0.000 |
| <b>Purine metabolism</b>                      |                        |           |    |                   |                  |                  |    |       |
| 99                                            | Inosine                | HMDB00195 | 3  | 1.12 (1.00; 1.26) | <b>0.049</b>     | 0.124            | 21 | 0.002 |
| 100                                           | Urate                  | HMDB00289 | 3  | 1.19 (0.99; 1.43) | 0.062            | 0.148            | 81 | 0.020 |
| <b>Pyrimidine metabolism</b>                  |                        |           |    |                   |                  |                  |    |       |
| 101                                           | 3-aminoisobutanate     | HMDB03911 | 3  | 0.95 (0.88; 1.03) | 0.210            | 0.357            | 7  | 0.000 |

|                                                            |                      |              |    |                   |                  |                  |    |       |
|------------------------------------------------------------|----------------------|--------------|----|-------------------|------------------|------------------|----|-------|
| 102                                                        | Pseudouridine        | HMDB00767    | 3  | 0.89 (0.66; 1.19) | 0.421            | 0.564            | 82 | 0.053 |
| 103                                                        | Uridine              | HMDB00296    | 5  | 0.97 (0.75; 1.24) | 0.788            | 0.869            | 91 | 0.071 |
| <b>Ubiquinone and other terpenoid-quinone biosynthesis</b> |                      |              |    |                   |                  |                  |    |       |
| 104                                                        | γ-tocopherol         | HMDB01492    | 2  | 0.87 (0.73; 1.04) | 0.139            | 0.267            | 0  | 0.000 |
| <b>Xenobiotics, food components</b>                        |                      |              |    |                   |                  |                  |    |       |
| 105                                                        | 2-hydroxyhippurate   | HMDB00840    | 2  | 1.08 (0.89; 1.30) | 0.433            | 0.571            | 44 | 0.009 |
| 106                                                        | 2-hydroxyisobutyrate | HMDB00729    | 3  | 1.33 (1.22; 1.45) | <b>&lt;0.001</b> | <b>&lt;0.001</b> | 0  | 0.000 |
| 107                                                        | Erythriol            | HMDB02994    | 2  | 1.12 (0.92; 1.35) | 0.254            | 0.408            | 0  | 0.000 |
| 108                                                        | Piperine             | HMDB29377    | 3  | 0.98 (0.74; 1.30) | 0.884            | 0.927            | 76 | 0.048 |
| <b>Acylcarnitine metabolism</b>                            |                      |              |    |                   |                  |                  |    |       |
| 109                                                        | 3-dehydrocarnitine   | HMDB12154    | 2  | 0.72 (0.50; 1.02) | 0.066            | 0.154            | 84 | 0.056 |
| 110                                                        | Deoxycarnitine       | HMDB01161    | 3  | 0.66 (0.46; 0.94) | <b>0.022</b>     | 0.067            | 90 | 0.088 |
| 111                                                        | Trimethyllysine      | HMDB01325    | 4  | 1.25 (1.15; 1.35) | <b>&lt;0.001</b> | <b>&lt;0.001</b> | 0  | 0.000 |
| 112                                                        | Carnitine            | HMDB00062    | 14 | 1.04 (0.96; 1.14) | 0.330            | 0.473            | 74 | 0.018 |
| 113                                                        | Acylcarnitine C2     | HMDB00201    | 16 | 1.00 (0.94; 1.07) | 0.993            | 0.998            | 56 | 0.008 |
| 114                                                        | Acylcarnitine C3     | HMDB00824    | 16 | 1.06 (0.98; 1.14) | 0.131            | 0.256            | 73 | 0.015 |
| 115                                                        | Acylcarnitine C3DC   | HMDB02095    | 5  | 1.07 (0.81; 1.40) | 0.632            | 0.741            | 94 | 0.083 |
| 116                                                        | Acylcarnitine C4     | HMDB02013    | 14 | 0.97 (0.88; 1.06) | 0.473            | 0.606            | 76 | 0.020 |
| 117                                                        | Acylcarnitine C4DC   | HMDB62785    | 4  | 1.10 (1.02; 1.18) | <b>0.013</b>     | <b>0.046</b>     | 0  | 0.000 |
| 118                                                        | Acylcarnitine C4OH   | HMDB0013127  | 6  | 1.09 (1.02; 1.16) | <b>0.011</b>     | <b>0.037</b>     | 0  | 0.000 |
| 119                                                        | Acylcarnitine C5     | HMDB13128    | 14 | 1.13 (1.08; 1.18) | <b>&lt;0.001</b> | <b>&lt;0.001</b> | 18 | 0.001 |
| 120                                                        | Acylcarnitine C5DC   | HMDB13130    | 7  | 0.97 (0.81; 1.16) | 0.722            | 0.821            | 88 | 0.046 |
| 121                                                        | Acylcarnitine C5OH   | CHEBI:86467  | 6  | 1.14 (1.03; 1.26) | <b>0.011</b>     | <b>0.037</b>     | 58 | 0.008 |
| 122                                                        | Acylcarnitine C5:1   | HMDB02366    | 6  | 0.96 (0.86; 1.08) | 0.483            | 0.614            | 72 | 0.013 |
| 123                                                        | Acylcarnitine C6     | HMDB00756    | 10 | 0.94 (0.82; 1.07) | 0.327            | 0.471            | 84 | 0.036 |
| 124                                                        | Acylcarnitine C6DC   | NA           | 5  | 0.85 (0.73; 1.00) | <b>0.048</b>     | 0.123            | 69 | 0.020 |
| 125                                                        | Acylcarnitine C6OH   | CHEBI:88772  | 2  | 0.97 (0.76; 1.25) | 0.832            | 0.895            | 68 | 0.023 |
| 126                                                        | Acylcarnitine C7     | CHEBI:74303  | 2  | 1.00 (0.91; 1.11) | 0.960            | 0.988            | 0  | 0.000 |
| 127                                                        | Acylcarnitine C7DC   | NA           | 5  | 0.92 (0.84; 1.01) | 0.080            | 0.179            | 55 | 0.006 |
| 128                                                        | Acylcarnitine C8     | HMDB00791    | 13 | 0.97 (0.92; 1.02) | 0.221            | 0.368            | 22 | 0.002 |
| 129                                                        | Acylcarnitine C8OH   | CHEBI:84100  | 2  | 1.01 (0.72; 1.41) | 0.957            | 0.988            | 80 | 0.048 |
| 130                                                        | Acylcarnitine C8:1   | CHEBI:86052  | 5  | 1.16 (1.07; 1.25) | <b>&lt;0.001</b> | <b>0.002</b>     | 39 | 0.003 |
| 131                                                        | Acylcarnitine C9     | HMDB13288    | 3  | 1.03 (0.94; 1.13) | 0.557            | 0.677            | 35 | 0.002 |
| 132                                                        | Acylcarnitine C10    | HMDB00651    | 11 | 1.01 (0.93; 1.10) | 0.779            | 0.865            | 64 | 0.011 |
| 133                                                        | Acylcarnitine C10:1  | CHEBI:86063  | 2  | 0.88 (0.78; 0.98) | <b>0.021</b>     | 0.066            | 0  | 0.000 |
| 134                                                        | Acylcarnitine C12    | HMDB02250    | 11 | 0.93 (0.84; 1.03) | 0.175            | 0.315            | 71 | 0.018 |
| 135                                                        | Acylcarnitine C12DC  | CHEBI:74121  | 2  | 0.93 (0.74; 1.18) | 0.564            | 0.684            | 89 | 0.025 |
| 136                                                        | Acylcarnitine C12OH  | CHEBI:73056  | 4  | 0.78 (0.47; 1.30) | 0.344            | 0.487            | 93 | 0.248 |
| 137                                                        | Acylcarnitine C12:1  | CHEBI:86065  | 8  | 0.89 (0.72; 1.10) | 0.284            | 0.427            | 91 | 0.078 |
| 138                                                        | Acylcarnitine C13    | CHEBI:137646 | 3  | 0.87 (0.75; 1.02) | 0.085            | 0.188            | 0  | 0.000 |
| 139                                                        | Acylcarnitine C14    | HMDB05066    | 10 | 0.99 (0.92; 1.06) | 0.746            | 0.844            | 44 | 0.005 |
| 140                                                        | Acylcarnitine C14OH  | CHEBI:137647 | 4  | 1.31 (0.94; 1.85) | 0.114            | 0.230            | 93 | 0.104 |

|                         |                       |              |    |                   |                  |                  |    |       |
|-------------------------|-----------------------|--------------|----|-------------------|------------------|------------------|----|-------|
| 141                     | Acylcarnitine C14:1   | CHEBI:86066  | 9  | 0.94 (0.89; 0.99) | <b>0.020</b>     | 0.065            | 0  | 0.000 |
| 142                     | Acylcarnitine C14:1OH | CHEBI:86067  | 4  | 1.16 (0.75; 1.80) | 0.492            | 0.619            | 96 | 0.180 |
| 143                     | Acylcarnitine C14:2   | CHEBI:86069  | 7  | 0.97 (0.91; 1.02) | 0.249            | 0.403            | 10 | 0.001 |
| 144                     | Acylcarnitine C16     | HMDB00222    | 15 | 1.06 (0.99; 1.12) | <b>0.083</b>     | 0.184            | 52 | 0.007 |
| 145                     | Acylcarnitine C16OH   | CHEBI:73070  | 4  | 1.07 (0.93; 1.23) | 0.358            | 0.501            | 62 | 0.011 |
| 146                     | Acylcarnitine C16:1   | CHEBI:86032  | 6  | 1.11 (0.81; 1.52) | 0.517            | 0.640            | 94 | 0.142 |
| 147                     | Acylcarnitine C16:1OH | CHEBI:86033  | 3  | 1.02 (0.93; 1.13) | 0.646            | 0.744            | 0  | 0.000 |
| 148                     | Acylcarnitine C16:2   | CHEBI:86035  | 6  | 1.13 (0.82; 1.55) | 0.466            | 0.601            | 96 | 0.143 |
| 149                     | Acylcarnitine C18     | HMDB00848    | 14 | 0.97 (0.81; 1.17) | 0.759            | 0.854            | 94 | 0.108 |
| 150                     | Acylcarnitine C18OH   | CHEBI:73077  | 3  | 1.17 (0.93; 1.47) | 0.175            | 0.315            | 58 | 0.024 |
| 151                     | Acylcarnitine C18:1   | CHEBI:86475  | 11 | 0.98 (0.84; 1.15) | 0.835            | 0.895            | 90 | 0.058 |
| 152                     | Acylcarnitine C18:1OH | CHEBI:86039  | 4  | 1.00 (0.83; 1.21) | 0.979            | 0.989            | 58 | 0.020 |
| 153                     | Acylcarnitine C18:2   | CHEBI:86480  | 10 | 1.08 (0.88; 1.31) | 0.471            | 0.605            | 94 | 0.092 |
| 154                     | Acylcarnitine C18:2OH | CHEBI:73075  | 3  | 1.09 (0.87; 1.36) | 0.441            | 0.578            | 53 | 0.020 |
| 155                     | Acylcarnitine C20     | HMDB06460    | 6  | 1.08 (0.78; 1.49) | 0.651            | 0.747            | 95 | 0.147 |
| 156                     | Acylcarnitine C20:4   | HMDB06455    | 5  | 1.18 (0.78; 1.78) | 0.434            | 0.571            | 96 | 0.203 |
| 157                     | Acylcarnitine C26     | NA           | 2  | 1.02 (0.91; 1.15) | 0.761            | 0.854            | 0  | 0.000 |
| <b>Triacylglycerols</b> |                       |              |    |                   |                  |                  |    |       |
| 158                     | TG 46:1               | CHEBI:85869  | 3  | 1.33 (1.23; 1.44) | <b>&lt;0.001</b> | <b>&lt;0.001</b> | 22 | 0.001 |
| 159                     | TG 46:2               | CHEBI:77447  | 3  | 1.29 (1.22; 1.37) | <b>&lt;0.001</b> | <b>&lt;0.001</b> | 0  | 0.000 |
| 160                     | TG 48:0               | CHEBI:85870  | 5  | 1.55 (1.37; 1.76) | <b>&lt;0.001</b> | <b>&lt;0.001</b> | 79 | 0.014 |
| 161                     | TG 48:1               | CHEBI:85726  | 7  | 1.46 (1.32; 1.61) | <b>&lt;0.001</b> | <b>&lt;0.001</b> | 73 | 0.012 |
| 162                     | TG 48:2               | CHEBI:85725  | 6  | 1.31 (1.21; 1.43) | <b>&lt;0.001</b> | <b>&lt;0.001</b> | 63 | 0.006 |
| 163                     | TG 48:3               | CHEBI:85871  | 6  | 1.26 (1.09; 1.47) | <b>0.002</b>     | <b>0.010</b>     | 83 | 0.025 |
| 164                     | TG 48:4               | CHEBI:85825  | 2  | 1.24 (1.13; 1.36) | <b>&lt;0.001</b> | <b>&lt;0.001</b> | 0  | 0.000 |
| 165                     | TG 49:2               | CHEBI:85727  | 2  | 1.38 (1.30; 1.47) | <b>&lt;0.001</b> | <b>&lt;0.001</b> | 0  | 0.000 |
| 166                     | TG 50:0               | CHEBI:85874  | 6  | 1.51 (1.30; 1.75) | <b>&lt;0.001</b> | <b>&lt;0.001</b> | 75 | 0.023 |
| 167                     | TG 50:1               | CHEBI:84665  | 6  | 1.55 (1.38; 1.73) | <b>&lt;0.001</b> | <b>&lt;0.001</b> | 80 | 0.015 |
| 168                     | TG 50:2               | CHEBI:84662  | 8  | 1.52 (1.36; 1.70) | <b>&lt;0.001</b> | <b>&lt;0.001</b> | 82 | 0.018 |
| 169                     | TG 50:3               | CHEBI:85729  | 7  | 1.37 (1.14; 1.66) | <b>0.001</b>     | <b>0.005</b>     | 93 | 0.055 |
| 170                     | TG 50:4               | CHEBI:85832  | 5  | 1.15 (0.99; 1.34) | 0.061            | 0.148            | 79 | 0.020 |
| 171                     | TG 50:5               | CHEBI:90301  | 5  | 1.26 (1.13; 1.39) | <b>&lt;0.001</b> | <b>&lt;0.001</b> | 55 | 0.007 |
| 172                     | TG 50:6               | CHEBI:141285 | 2  | 1.25 (1.13; 1.37) | <b>&lt;0.001</b> | <b>&lt;0.001</b> | 0  | 0.000 |
| 173                     | TG 51:0               | CHEBI:140862 | 3  | 1.38 (1.25; 1.53) | <b>&lt;0.001</b> | <b>&lt;0.001</b> | 0  | 0.000 |
| 174                     | TG 51:1               | CHEBI:85733  | 2  | 1.54 (1.36; 1.74) | <b>&lt;0.001</b> | <b>&lt;0.001</b> | 51 | 0.004 |
| 175                     | TG 51:2               | CHEBI:85732  | 4  | 1.33 (1.21; 1.46) | <b>&lt;0.001</b> | <b>&lt;0.001</b> | 51 | 0.004 |
| 176                     | TG 51:3               | CHEBI:85731  | 3  | 1.31 (1.22; 1.42) | <b>&lt;0.001</b> | <b>&lt;0.001</b> | 0  | 0.000 |
| 177                     | TG 52:1               | CHEBI:90302  | 4  | 1.78 (1.35; 2.35) | <b>&lt;0.001</b> | <b>&lt;0.001</b> | 89 | 0.068 |
| 178                     | TG 52:2               | CHEBI:85736  | 5  | 1.57 (1.37; 1.80) | <b>&lt;0.001</b> | <b>&lt;0.001</b> | 57 | 0.012 |
| 179                     | TG 52:3               | CHEBI:84661  | 6  | 1.24 (1.08; 1.43) | <b>0.002</b>     | <b>0.009</b>     | 80 | 0.021 |
| 180                     | TG 52:4               | CHEBI:84660  | 4  | 1.06 (0.90; 1.23) | 0.484            | 0.614            | 85 | 0.020 |
| 181                     | TG 52:5               | CHEBI:85734  | 3  | 1.09 (0.88; 1.35) | 0.445            | 0.582            | 85 | 0.028 |

|                        |          |              |   |                   |                  |                  |    |       |
|------------------------|----------|--------------|---|-------------------|------------------|------------------|----|-------|
| 182                    | TG 52:6  | CHEBI:85875  | 5 | 1.21 (1.03; 1.42) | <b>0.022</b>     | 0.067            | 81 | 0.025 |
| 183                    | TG 52:7  | CHEBI:136390 | 2 | 1.12 (1.02; 1.24) | <b>0.019</b>     | 0.062            | 0  | 0.000 |
| 184                    | TG 53:2  | CHEBI:85739  | 3 | 1.33 (1.24; 1.44) | <b>&lt;0.001</b> | <b>&lt;0.001</b> | 0  | 0.000 |
| 185                    | TG 53:3  | CHEBI:85738  | 4 | 1.24 (0.99; 1.53) | 0.056            | 0.138            | 87 | 0.039 |
| 186                    | TG 54:1  | CHEBI:90305  | 4 | 1.28 (1.03; 1.59) | <b>0.027</b>     | 0.080            | 88 | 0.041 |
| 187                    | TG 54:2  | CHEBI:85743  | 4 | 1.42 (1.15; 1.74) | <b>0.001</b>     | <b>0.005</b>     | 78 | 0.030 |
| 188                    | TG 54:3  | CHEBI:84659  | 6 | 1.21 (1.12; 1.31) | <b>&lt;0.001</b> | <b>&lt;0.001</b> | 35 | 0.003 |
| 189                    | TG 54:4  | CHEBI:85742  | 6 | 1.16 (0.95; 1.41) | 0.154            | 0.287            | 93 | 0.055 |
| 190                    | TG 54:5  | CHEBI:85741  | 6 | 1.18 (0.96; 1.45) | 0.110            | 0.224            | 92 | 0.056 |
| 191                    | TG 54:6  | CHEBI:85876  | 6 | 1.16 (0.98; 1.37) | 0.094            | 0.199            | 88 | 0.036 |
| 192                    | TG 54:7  | CHEBI:85740  | 6 | 1.30 (1.08; 1.56) | <b>0.005</b>     | <b>0.018</b>     | 89 | 0.043 |
| 193                    | TG 54:8  | CHEBI:85837  | 3 | 1.17 (0.89; 1.55) | 0.267            | 0.411            | 86 | 0.051 |
| 194                    | TG 54:9  | CHEBI:138346 | 3 | 1.00 (0.89; 1.12) | 0.967            | 0.988            | 16 | 0.002 |
| 195                    | TG 55:6  | CHEBI:85744  | 2 | 1.53 (1.08; 2.19) | <b>0.018</b>     | 0.059            | 65 | 0.045 |
| 196                    | TG 56:3  | CHEBI:85843  | 3 | 1.22 (1.08; 1.39) | <b>0.002</b>     | <b>0.008</b>     | 64 | 0.007 |
| 197                    | TG 56:4  | CHEBI:85842  | 3 | 1.13 (0.95; 1.36) | 0.174            | 0.315            | 80 | 0.018 |
| 198                    | TG 56:5  | CHEBI:85751  | 5 | 1.24 (1.02; 1.51) | <b>0.029</b>     | 0.083            | 90 | 0.042 |
| 199                    | TG 56:6  | CHEBI:85750  | 5 | 1.25 (1.07; 1.47) | <b>0.005</b>     | <b>0.018</b>     | 76 | 0.022 |
| 200                    | TG 56:7  | CHEBI:85749  | 4 | 1.21 (0.94; 1.55) | 0.141            | 0.269            | 91 | 0.057 |
| 201                    | TG 56:8  | CHEBI:85748  | 5 | 1.10 (0.88; 1.39) | 0.407            | 0.550            | 94 | 0.063 |
| 202                    | TG 56:9  | CHEBI:85747  | 3 | 0.89 (0.72; 1.11) | 0.312            | 0.458            | 72 | 0.026 |
| 203                    | TG 56:10 | CHEBI:85877  | 3 | 0.94 (0.81; 1.10) | 0.453            | 0.588            | 46 | 0.008 |
| 204                    | TG 58:7  | CHEBI:85755  | 2 | 1.18 (1.02; 1.37) | <b>0.026</b>     | 0.078            | 76 | 0.009 |
| 205                    | TG 58:8  | CHEBI:85754  | 3 | 1.07 (0.90; 1.27) | 0.434            | 0.571            | 77 | 0.016 |
| 206                    | TG 58:9  | CHEBI:85753  | 3 | 1.02 (0.88; 1.18) | 0.779            | 0.865            | 59 | 0.009 |
| 207                    | TG 58:10 | CHEBI:85732  | 3 | 1.01 (0.67; 1.52) | 0.974            | 0.988            | 93 | 0.121 |
| 208                    | TG 58:11 | CHEBI:132733 | 2 | 1.30 (0.82; 2.07) | 0.265            | 0.411            | 92 | 0.103 |
| 209                    | TG 60:12 | CHEBI:134112 | 2 | 0.89 (0.65; 1.21) | 0.451            | 0.588            | 79 | 0.039 |
| <b>Diacylglycerols</b> |          |              |   |                   |                  |                  |    |       |
| 210                    | DG 30:0  | CHEBI:85683  | 3 | 1.17 (1.10; 1.25) | <b>&lt;0.001</b> | <b>&lt;0.001</b> | 0  | 0.000 |
| 211                    | DG 32:0  | CHEBI:85688  | 2 | 1.36 (1.06; 1.74) | <b>0.015</b>     | <b>0.049</b>     | 88 | 0.028 |
| 212                    | DG 32:1  | CHEBI:85687  | 3 | 1.17 (1.10; 1.25) | <b>&lt;0.001</b> | <b>&lt;0.001</b> | 0  | 0.000 |
| 213                    | DG 32:2  | CHEBI:85686  | 3 | 1.10 (0.99; 1.23) | 0.089            | 0.192            | 48 | 0.005 |
| 214                    | DG 34:0  | CHEBI:86974  | 2 | 1.36 (0.92; 2.01) | 0.125            | 0.249            | 95 | 0.076 |
| 215                    | DG 34:1  | CHEBI:85694  | 5 | 1.47 (1.22; 1.77) | <b>&lt;0.001</b> | <b>&lt;0.001</b> | 66 | 0.027 |
| 216                    | DG 34:2  | CHEBI:85693  | 6 | 1.34 (1.19; 1.52) | <b>&lt;0.001</b> | <b>&lt;0.001</b> | 71 | 0.013 |
| 217                    | DG 34:3  | CHEBI:85692  | 2 | 1.44 (0.94; 2.21) | 0.094            | 0.199            | 89 | 0.085 |
| 218                    | DG 36:1  | CHEBI:86980  | 3 | 1.74 (1.01; 3.01) | <b>0.046</b>     | 0.119            | 97 | 0.222 |
| 219                    | DG 36:2  | CHEBI:85701  | 5 | 1.30 (1.09; 1.55) | <b>0.003</b>     | <b>0.014</b>     | 87 | 0.030 |
| 220                    | DG 36:3  | CHEBI:85700  | 5 | 1.22 (1.14; 1.31) | <b>&lt;0.001</b> | <b>&lt;0.001</b> | 13 | 0.001 |
| 221                    | DG 36:4  | CHEBI:85699  | 3 | 0.98 (0.77; 1.24) | 0.875            | 0.929            | 90 | 0.038 |
| 222                    | DG 38:4  | CHEBI:85705  | 2 | 1.25 (1.14; 1.36) | <b>&lt;0.001</b> | <b>&lt;0.001</b> | 39 | 0.002 |

|                                    |                       |              |   |                   |                  |                  |    |       |
|------------------------------------|-----------------------|--------------|---|-------------------|------------------|------------------|----|-------|
| 223                                | DG 38:5               | CHEBI:85704  | 2 | 1.19 (1.11; 1.27) | <b>&lt;0.001</b> | <b>&lt;0.001</b> | 0  | 0.000 |
| <b><i>Monoacylglycerols</i></b>    |                       |              |   |                   |                  |                  |    |       |
| 224                                | MG 16:1               | CHEBI:87251  | 3 | 1.39 (1.27; 1.52) | <b>&lt;0.001</b> | <b>&lt;0.001</b> | 0  | 0.000 |
| 225                                | MG 18:1               | CHEBI:87256  | 4 | 1.16 (1.04; 1.29) | <b>0.007</b>     | <b>0.026</b>     | 72 | 0.008 |
| 226                                | MG 18:2               | CHEBI:87257  | 2 | 1.09 (0.88; 1.35) | 0.432            | 0.571            | 79 | 0.019 |
| <b><i>Phosphatidylcholines</i></b> |                       |              |   |                   |                  |                  |    |       |
| 227                                | Glycerophosphocholine | HMDB00086    | 7 | 0.85 (0.71; 1.01) | 0.060            | 0.146            | 83 | 0.040 |
| 228                                | PC 28:1               | CHEBI:65293  | 2 | 0.99 (0.89; 1.10) | 0.814            | 0.885            | 45 | 0.003 |
| 229                                | PC 30:0               | CHEBI:65303  | 5 | 1.07 (1.03; 1.12) | <b>0.001</b>     | <b>0.005</b>     | 0  | 0.000 |
| 230                                | PC 30:1               | CHEBI:65302  | 4 | 1.02 (0.85; 1.22) | 0.836            | 0.895            | 82 | 0.026 |
| 231                                | PC 32:0               | CHEBI:66850  | 7 | 1.06 (0.95; 1.19) | 0.270            | 0.411            | 87 | 0.016 |
| 232                                | PC 32:1               | CHEBI:66849  | 9 | 1.09 (0.99; 1.21) | 0.093            | 0.199            | 88 | 0.018 |
| 233                                | PC 32:2               | CHEBI:66848  | 7 | 1.04 (0.95; 1.14) | 0.384            | 0.528            | 76 | 0.010 |
| 234                                | PC 32:3               | CHEBI:66847  | 3 | 0.89 (0.83; 0.95) | <b>0.001</b>     | <b>0.005</b>     | 0  | 0.000 |
| 235                                | PC 33:1               | CHEBI:86472  | 3 | 1.09 (0.85; 1.38) | 0.504            | 0.627            | 92 | 0.039 |
| 236                                | PC 33:2               | CHEBI:85853  | 4 | 0.83 (0.64; 1.07) | 0.142            | 0.270            | 91 | 0.056 |
| 237                                | PC 33:3               | CHEBI:134587 | 3 | 0.79 (0.58; 1.09) | 0.149            | 0.280            | 85 | 0.063 |
| 238                                | PC 34:0               | CHEBI:66855  | 6 | 1.03 (0.98; 1.09) | 0.218            | 0.365            | 27 | 0.001 |
| 239                                | PC 34:1               | CHEBI:64517  | 7 | 0.97 (0.85; 1.1.) | 0.633            | 0.741            | 93 | 0.027 |
| 240                                | PC 34:2               | CHEBI:64516  | 9 | 1.01 (0.89; 1.15) | 0.866            | 0.920            | 92 | 0.028 |
| 241                                | PC 34:3               | CHEBI:64424  | 9 | 0.97 (0.83; 1.14) | 0.702            | 0.801            | 94 | 0.050 |
| 242                                | PC 34:4               | CHEBI:64423  | 5 | 1.06 (0.97; 1.17) | 0.203            | 0.351            | 64 | 0.007 |
| 243                                | PC 35:2               | CHEBI:85766  | 4 | 0.81 (0.67; 0.97) | <b>0.025</b>     | 0.075            | 84 | 0.028 |
| 244                                | PC 36:0               | CHEBI:66858  | 4 | 0.95 (0.86; 1.04) | 0.262            | 0.411            | 77 | 0.007 |
| 245                                | PC 36:1               | CHEBI:66857  | 6 | 1.05 (1.00; 1.11) | <b>0.044</b>     | 0.116            | 48 | 0.002 |
| 246                                | PC 36:2               | CHEBI:64433  | 9 | 0.99 (0.96; 1.02) | 0.433            | 0.571            | 0  | 0.000 |
| 247                                | PC 36:3               | CHEBI:64523  | 6 | 1.00 (0.92; 1.08) | 0.943            | 0.978            | 80 | 0.006 |
| 248                                | PC 36:4               | CHEBI:64520  | 7 | 0.93 (0.82; 1.06) | 0.261            | 0.411            | 94 | 0.025 |
| 249                                | PC 36:5               | CHEBI:64504  | 5 | 0.98 (0.91; 1.05) | 0.505            | 0.627            | 66 | 0.004 |
| 250                                | PC 36:6               | CHEBI:66856  | 3 | 0.99 (0.9.; 1.08) | 0.786            | 0.868            | 49 | 0.003 |
| 251                                | PC 37:4               | CHEBI:72427  | 3 | 0.81 (0.58; 1.13) | 0.212            | 0.358            | 95 | 0.076 |
| 252                                | PC 38:0               | CHEBI:66861  | 2 | 0.88 (0.83; 0.93) | <b>&lt;0.001</b> | <b>&lt;0.001</b> | 0  | 0.000 |
| 253                                | PC 38:1               | CHEBI:66860  | 2 | 0.91 (0.82; 1.02) | 0.093            | 0.199            | 74 | 0.005 |
| 254                                | PC 38:2               | CHEBI:66859  | 7 | 1.02 (0.97; 1.08) | 0.394            | 0.538            | 21 | 0.001 |
| 255                                | PC 38:3               | CHEBI:64446  | 7 | 1.19 (1.09; 1.29) | <b>&lt;0.001</b> | <b>&lt;0.001</b> | 75 | 0.008 |
| 256                                | PC 38:4               | CHEBI:64526  | 6 | 0.98 (0.95; 1.01) | 0.206            | 0.353            | 0  | 0.000 |
| 257                                | PC 38:5               | CHEBI:64525  | 5 | 0.95 (0.90; 1.01) | 0.089            | 0.192            | 63 | 0.002 |
| 258                                | PC 38:6               | CHEBI:64519  | 9 | 0.94 (0.88; 0.99) | <b>0.032</b>     | 0.091            | 59 | 0.004 |
| 259                                | PC 39:6               | CHEBI:131430 | 2 | 0.73 (0.46; 1.15) | 0.178            | 0.317            | 86 | 0.096 |
| 260                                | PC 40:1               | CHEBI:66865  | 2 | 0.83 (0.77; 0.90) | <b>&lt;0.001</b> | <b>&lt;0.001</b> | 28 | 0.001 |
| 261                                | PC 40:2               | CHEBI:66864  | 2 | 0.92 (0.84; 1.00) | 0.052            | 0.130            | 56 | 0.002 |
| 262                                | PC 40:3               | CHEBI:66863  | 2 | 0.88 (0.83; 0.93) | <b>&lt;0.001</b> | <b>&lt;0.001</b> | 0  | 0.000 |



|                                         |                   |              |    |                   |                  |                  |    |       |
|-----------------------------------------|-------------------|--------------|----|-------------------|------------------|------------------|----|-------|
| 263                                     | PC 40:4           | CHEBI:66862  | 3  | 0.93 (0.79; 1.08) | 0.331            | 0.473            | 82 | 0.014 |
| 264                                     | PC 40:5           | CHEBI:64524  | 4  | 1.05 (0.98; 1.12) | 0.191            | 0.335            | 53 | 0.002 |
| 265                                     | PC 40:6           | CHEBI:64431  | 7  | 1.05 (0.97; 1.13) | 0.266            | 0.411            | 70 | 0.007 |
| 266                                     | PC 40:7           | CHEBI:64521  | 2  | 0.68 (0.39; 1.20) | 0.188            | 0.333            | 91 | 0.152 |
| 267                                     | PC 40:9           | CHEBI:85850  | 2  | 0.89 (0.80; 1.00) | 0.053            | 0.131            | 0  | 0.000 |
| 268                                     | PC 42:0           | CHEBI:66971  | 2  | 0.78 (0.63; 0.95) | <b>0.015</b>     | <b>0.049</b>     | 87 | 0.019 |
| 269                                     | PC 42:1           | CHEBI:66970  | 2  | 0.83 (0.78; 0.89) | <b>&lt;0.001</b> | <b>&lt;0.001</b> | 19 | 0.000 |
| 270                                     | PC 42:2           | CHEBI:66969  | 2  | 0.88 (0.83; 0.93) | <b>&lt;0.001</b> | <b>&lt;0.001</b> | 0  | 0.000 |
| 271                                     | PC 42:3           | CHEBI:66968  | 2  | 0.82 (0.75; 0.89) | <b>&lt;0.001</b> | <b>&lt;0.001</b> | 0  | 0.000 |
| 272                                     | PC 42:4           | CHEBI:66967  | 2  | 0.88 (0.83; 0.93) | <b>&lt;0.001</b> | <b>&lt;0.001</b> | 0  | 0.000 |
| 273                                     | PC 42:5           | CHEBI:66966  | 2  | 0.98 (0.88; 1.10) | 0.751            | 0.848            | 73 | 0.005 |
| 274                                     | PC 42:6           | CHEBI:66965  | 2  | 1.05 (0.98; 1.13) | 0.193            | 0.338            | 0  | 0.000 |
| 275                                     | PC 44:3           | CHEBI:66976  | 2  | 0.92 (0.86; 1.00) | <b>0.038</b>     | 0.104            | 0  | 0.000 |
| 276                                     | PC 44:4           | CHEBI:66975  | 2  | 0.81 (0.70; 0.94) | <b>0.007</b>     | <b>0.024</b>     | 68 | 0.008 |
| 277                                     | PC 44:5           | CHEBI:66974  | 3  | 0.86 (0.70; 1.05) | 0.133            | 0.258            | 86 | 0.026 |
| 278                                     | PC 44:6           | CHEBI:66973  | 2  | 0.76 (0.60; 0.96) | <b>0.020</b>     | 0.064            | 87 | 0.025 |
| 279                                     | Phosphorylcholine | HMDB01565    | 3  | 0.91 (0.75; 1.11) | 0.351            | 0.495            | 75 | 0.022 |
| <b><i>Lysophosphatidylcholines</i></b>  |                   |              |    |                   |                  |                  |    |       |
| 280                                     | LPC 14:0          | CHEBI:64483  | 7  | 1.09 (1.04; 1.14) | <b>&lt;0.001</b> | <b>0.003</b>     | 0  | 0.000 |
| 281                                     | LPC 15:0          | CHEBI:72736  | 3  | 0.83 (0.64; 1.08) | 0.170            | 0.311            | 77 | 0.039 |
| 282                                     | LPC 16:0          | CHEBI:64563  | 11 | 0.96 (0.89; 1.03) | 0.228            | 0.375            | 70 | 0.009 |
| 283                                     | LPC 16:1          | CHEBI:64560  | 11 | 0.98 (0.93; 1.04) | 0.574            | 0.691            | 46 | 0.004 |
| 284                                     | LPC 17:0          | CHEBI:72737  | 8  | 0.80 (0.74; 0.85) | <b>&lt;0.001</b> | <b>&lt;0.001</b> | 18 | 0.002 |
| 285                                     | LPC 17:1          | CHEBI:73853  | 2  | 0.79 (0.72; 0.87) | <b>&lt;0.001</b> | <b>&lt;0.001</b> | 0  | 0.000 |
| 286                                     | LPC 18:0          | CHEBI:64561  | 13 | 0.89 (0.82; 0.96) | <b>0.003</b>     | <b>0.013</b>     | 76 | 0.013 |
| 287                                     | LPC 18:1          | CHEBI:64566  | 13 | 0.79 (0.75; 0.83) | <b>&lt;0.001</b> | <b>&lt;0.001</b> | 24 | 0.002 |
| 288                                     | LPC 18:2          | CHEBI:64549  | 13 | 0.74 (0.69; 0.79) | <b>&lt;0.001</b> | <b>&lt;0.001</b> | 58 | 0.008 |
| 289                                     | LPC 18:3          | CHEBI:64565  | 3  | 0.85 (0.79; 0.92) | <b>&lt;0.001</b> | <b>0.001</b>     | 16 | 0.001 |
| 290                                     | LPC 19:1          | NA           | 2  | 0.69 (0.58; 0.82) | <b>&lt;0.001</b> | <b>&lt;0.001</b> | 0  | 0.000 |
| 291                                     | LPC 20:0          | CHEBI:67058  | 3  | 0.81 (0.69; 0.94) | <b>0.008</b>     | <b>0.028</b>     | 71 | 0.013 |
| 292                                     | LPC 20:1          | CHEBI:67057  | 4  | 0.70 (0.60; 0.81) | <b>&lt;0.001</b> | <b>&lt;0.001</b> | 50 | 0.012 |
| 293                                     | LPC 20:2          | CHEBI:67056  | 4  | 0.84 (0.78; 0.90) | <b>&lt;0.001</b> | <b>&lt;0.001</b> | 0  | 0.000 |
| 294                                     | LPC 20:3          | CHEBI:64481  | 7  | 1.02 (0.98; 1.07) | 0.316            | 0.461            | 8  | 0.000 |
| 295                                     | LPC 20:4          | CHEBI:64568  | 9  | 0.87 (0.81; 0.94) | <b>0.001</b>     | <b>0.004</b>     | 61 | 0.008 |
| 296                                     | LPC 20:5          | CHEBI:64559  | 5  | 0.92 (0.85; 0.99) | <b>0.025</b>     | 0.074            | 3  | 0.000 |
| 297                                     | LPC 22:5          | CHEBI:74349  | 2  | 0.76 (0.53; 1.10) | 0.143            | 0.271            | 74 | 0.051 |
| 298                                     | LPC 22:6          | CHEBI:64567  | 7  | 0.84 (0.75; 0.94) | <b>0.002</b>     | <b>0.008</b>     | 73 | 0.015 |
| 299                                     | LPC 24:0          | CHEBI:74470  | 3  | 0.81 (0.71; 0.93) | <b>0.003</b>     | <b>0.012</b>     | 73 | 0.009 |
| <b><i>Phosphatidylethanolamines</i></b> |                   |              |    |                   |                  |                  |    |       |
| 300                                     | PE 34:1           | CHEBI:155834 | 2  | 1.36 (1.08; 1.72) | <b>0.009</b>     | <b>0.032</b>     | 59 | 0.019 |
| 301                                     | PE 34:2           | CHEBI:155835 | 2  | 1.19 (1.1; 1.29)  | <b>&lt;0.001</b> | <b>&lt;0.001</b> | 45 | 0.001 |
| 302                                     | PE 34:3           | NA           | 2  | 1.04 (0.79; 1.36) | 0.786            | 0.868            | 93 | 0.035 |

|                                      |          |              |    |                   |                  |                  |    |       |
|--------------------------------------|----------|--------------|----|-------------------|------------------|------------------|----|-------|
| 303                                  | PE 36:1  | CHEBI:134451 | 3  | 1.41 (1.15; 1.74) | <b>0.001</b>     | <b>0.005</b>     | 83 | 0.026 |
| 304                                  | PE 36:2  | CHEBI:141588 | 4  | 1.18 (1.07; 1.30) | <b>0.001</b>     | <b>0.006</b>     | 75 | 0.007 |
| 305                                  | PE 36:3  | CHEBI:141589 | 3  | 1.03 (0.81; 1.30) | 0.825            | 0.892            | 96 | 0.041 |
| 306                                  | PE 36:4  | CHEBI:134271 | 5  | 1.18 (0.98; 1.41) | 0.075            | 0.171            | 93 | 0.036 |
| 307                                  | PE 36:5  | NA           | 2  | 1.02 (0.93; 1.12) | 0.696            | 0.796            | 62 | 0.003 |
| 308                                  | PE 38:4  | CHEBI:134270 | 4  | 1.17 (1.07; 1.28) | <b>&lt;0.001</b> | <b>0.002</b>     | 57 | 0.004 |
| 309                                  | PE 38:5  | CHEBI:134239 | 4  | 1.09 (0.89; 1.34) | 0.395            | 0.538            | 93 | 0.038 |
| 310                                  | PE 38:6  | CHEBI:134428 | 3  | 1.08 (0.86; 1.35) | 0.498            | 0.624            | 95 | 0.036 |
| 311                                  | PE 40:6  | CHEBI:134241 | 2  | 1.21 (1.13; 1.29) | <b>&lt;0.001</b> | <b>&lt;0.001</b> | 0  | 0.000 |
| <b>Lysophosphatidylethanolamines</b> |          |              |    |                   |                  |                  |    |       |
| 312                                  | LPE 16:0 | CHEBI:90452  | 8  | 0.90 (0.78; 1.03) | 0.133            | 0.258            | 89 | 0.032 |
| 313                                  | LPE 18:0 | CHEBI:64576  | 8  | 0.95 (0.88; 1.04) | 0.250            | 0.403            | 72 | 0.009 |
| 314                                  | LPE 18:1 | CHEBI:64575  | 7  | 0.94 (0.83; 1.05) | 0.268            | 0.411            | 82 | 0.019 |
| 315                                  | LPE 18:2 | CHEBI:91296  | 7  | 0.93 (0.81; 1.06) | 0.264            | 0.411            | 85 | 0.025 |
| 316                                  | LPE 20:4 | CHEBI:64569  | 6  | 0.96 (0.84; 1.10) | 0.520            | 0.642            | 86 | 0.022 |
| 317                                  | LPE 22:6 | CHEBI:72734  | 4  | 0.99 (0.92; 1.07) | 0.844            | 0.901            | 12 | 0.001 |
| <b>Phosphatidylinositols</b>         |          |              |    |                   |                  |                  |    |       |
| 318                                  | PI 34:0  | CHEBI:74232  | 2  | 1.12 (0.90; 1.39) | 0.325            | 0.469            | 87 | 0.022 |
| 319                                  | PI 34:1  | CHEBI:74237  | 3  | 1.11 (0.92; 1.34) | 0.281            | 0.426            | 91 | 0.026 |
| 320                                  | PI 36:1  | CHEBI:74371  | 3  | 1.04 (0.93; 1.17) | 0.504            | 0.627            | 54 | 0.005 |
| 321                                  | PI 36:2  | CHEBI:74372  | 2  | 1.00 (0.93; 1.08) | 0.936            | 0.974            | 28 | 0.001 |
| 322                                  | PI 36:3  | CHEBI:91036  | 2  | 0.95 (0.78; 1.15) | 0.575            | 0.691            | 86 | 0.017 |
| 323                                  | PI 36:4  | CHEBI:75194  | 2  | 1.06 (0.92; 1.21) | 0.424            | 0.568            | 72 | 0.007 |
| 324                                  | PI 38:3  | CHEBI:91039  | 2  | 1.13 (1.05; 1.21) | <b>0.001</b>     | <b>0.005</b>     | 0  | 0.000 |
| 325                                  | PI 38:4  | CHEBI:74240  | 3  | 1.04 (0.90; 1.19) | 0.615            | 0.728            | 80 | 0.012 |
| 326                                  | PI 38:5  | CHEBI:74241  | 2  | 0.85 (0.80; 0.92) | <b>&lt;0.001</b> | <b>&lt;0.001</b> | 0  | 0.000 |
| <b>Lysophosphatidylinositols</b>     |          |              |    |                   |                  |                  |    |       |
| 327                                  | LPI 16:1 | CHEBI:74464  | 3  | 1.57 (1.16; 2.12) | <b>0.003</b>     | <b>0.013</b>     | 68 | 0.047 |
| <b>Sphingomyelins</b>                |          |              |    |                   |                  |                  |    |       |
| 328                                  | SM 32:1  | CHEBI:64586  | 8  | 1.05 (0.95; 1.16) | 0.318            | 0.462            | 79 | 0.013 |
| 329                                  | SM 32:2  | CHEBI:72510  | 4  | 0.91 (0.74; 1.12) | 0.385            | 0.528            | 84 | 0.032 |
| 330                                  | SM 33:1  | CHEBI:64585  | 2  | 1.04 (0.80; 1.36) | 0.771            | 0.861            | 92 | 0.034 |
| 331                                  | SM 34:0  | CHEBI:72513  | 3  | 1.15 (1.10; 1.21) | <b>&lt;0.001</b> | <b>&lt;0.001</b> | 0  | 0.000 |
| 332                                  | SM 34:1  | CHEBI:72514  | 11 | 0.97 (0.88; 1.08) | 0.699            | 0.728            | 85 | 0.022 |
| 333                                  | SM 34:2  | CHEBI:64587  | 10 | 0.95 (0.86; 1.06) | 0.374            | 0.557            | 85 | 0.025 |
| 334                                  | SM 35:1  | CHEBI:133629 | 2  | 1.02 (0.90; 1.16) | 0.770            | 0.861            | 65 | 0.005 |
| 335                                  | SM 36:0  | CHEBI:72517  | 2  | 1.45 (0.95; 2.19) | 0.082            | 0.183            | 98 | 0.088 |
| 336                                  | SM 36:1  | CHEBI:72518  | 11 | 1.11 (1.01; 1.21) | <b>0.028</b>     | 0.081            | 81 | 0.017 |
| 337                                  | SM 36:2  | CHEBI:72519  | 10 | 1.00 (0.90; 1.11) | 0.991            | 0.998            | 85 | 0.022 |
| 338                                  | SM 36:3  | CHEBI:72520  | 6  | 0.86 (0.79; 0.93) | <b>&lt;0.001</b> | <b>0.001</b>     | 44 | 0.004 |
| 339                                  | SM 38:0  | CHEBI:72522  | 2  | 1.37 (1.02; 1.83) | <b>0.034</b>     | 0.096            | 97 | 0.042 |
| 340                                  | SM 38:1  | CHEBI:72523  | 6  | 1.13 (1.01; 1.26) | <b>0.034</b>     | 0.095            | 87 | 0.016 |

|                  |                    |              |   |                   |                  |                  |    |       |
|------------------|--------------------|--------------|---|-------------------|------------------|------------------|----|-------|
| 341              | SM 38:2            | CHEBI:72524  | 5 | 0.94 (0.83; 1.05) | 0.261            | 0.411            | 72 | 0.011 |
| 342              | SM 38:3            | CHEBI:72525  | 2 | 0.92 (0.85; 1.00) | <b>0.039</b>     | 0.104            | 0  | 0.000 |
| 343              | SM 39:1            | CHEBI:85761  | 2 | 1.11 (1.03; 1.19) | <b>0.005</b>     | <b>0.018</b>     | 0  | 0.000 |
| 344              | SM 40:0            | CHEBI:72527  | 2 | 1.43 (0.92; 2.22) | 0.114            | 0.230            | 99 | 0.100 |
| 345              | SM 40:1            | CHEBI:72528  | 7 | 1.16 (1.00; 1.34) | <b>0.047</b>     | 0.119            | 89 | 0.028 |
| 346              | SM 40:2            | CHEBI:72529  | 5 | 0.99 (0.88; 1.12) | 0.881            | 0.926            | 74 | 0.013 |
| 347              | SM 41:1            | CHEBI:83893  | 4 | 1.23 (1.14; 1.33) | <b>&lt;0.001</b> | <b>&lt;0.001</b> | 0  | 0.000 |
| 348              | SM 41:2            | CHEBI:85762  | 4 | 0.98 (0.92; 1.05) | 0.538            | 0.662            | 0  | 0.000 |
| 349              | SM 41:3            | CHEBI:137914 | 2 | 0.74 (0.40; 1.37) | 0.334            | 0.475            | 84 | 0.172 |
| 350              | SM 42:1            | CHEBI:72533  | 9 | 0.97 (0.79; 1.19) | 0.792            | 0.870            | 96 | 0.086 |
| 351              | SM 42:2            | CHEBI:72534  | 8 | 0.99 (0.89; 1.11) | 0.896            | 0.935            | 83 | 0.019 |
| 352              | SM 42:3            | CHEBI:72535  | 4 | 0.99 (0.86; 1.13) | 0.871            | 0.921            | 78 | 0.013 |
| 353              | SM 42:4            | CHEBI:72536  | 2 | 0.59 (0.31; 1.11) | 0.102            | 0.213            | 86 | 0.182 |
| 354              | SM 44:1            | CHEBI:72538  | 2 | 1.00 (0.84; 1.20) | 0.974            | 0.988            | 86 | 0.015 |
| 355              | SM 44:2            | CHEBI:72539  | 2 | 0.88 (0.81; 0.96) | <b>0.004</b>     | <b>0.014</b>     | 23 | 0.001 |
| 356              | Sphinganine        | HMDB00269    | 2 | 1.30 (0.88; 1.93) | 0.191            | 0.335            | 56 | 0.045 |
| 357              | Sphingosine        | HMDB00252    | 3 | 0.95 (0.82; 1.10) | 0.467            | 0.602            | 0  | 0.000 |
| <b>Ceramides</b> |                    |              |   |                   |                  |                  |    |       |
| 358              | Cer d18:0/16:0     | HMDB11760    | 2 | 1.19 (0.96; 1.49) | 0.117            | 0.234            | 91 | 0.023 |
| 359              | Cer d18:0/18:0     | HMDB11761    | 2 | 1.37 (0.93; 2.02) | 0.108            | 0.222            | 96 | 0.074 |
| 360              | Cer d18:0/20:0     | HMDB11764    | 2 | 1.24 (1.04; 1.48) | <b>0.017</b>     | 0.057            | 84 | 0.014 |
| 361              | Cer d18:0/22:0     | HMDB11765    | 2 | 1.33 (0.96; 1.86) | 0.087            | 0.190            | 95 | 0.054 |
| 362              | Cer d18:0/24:0     | HMDB11768    | 2 | 1.29 (1.01; 1.64) | <b>0.041</b>     | 0.109            | 90 | 0.028 |
| 363              | Cer d18:0/24:1     | HMDB11769    | 2 | 1.27 (0.95; 1.70) | 0.105            | 0.218            | 94 | 0.042 |
| 364              | Cer d18:1/16:0     | HMDB04949    | 4 | 1.16 (1.01; 1.35) | <b>0.039</b>     | 0.104            | 89 | 0.019 |
| 365              | Cer d18:1/18:0     | HMDB04950    | 3 | 1.36 (1.06; 1.74) | <b>0.017</b>     | 0.055            | 95 | 0.046 |
| 366              | Cer d18:1/18:1     | HMDB04948    | 2 | 1.15 (1.07; 1.23) | <b>&lt;0.001</b> | <b>&lt;0.001</b> | 0  | 0.000 |
| 367              | Cer d18:1/20:0     | HMDB04951    | 2 | 1.27 (1.02; 1.58) | <b>0.036</b>     | 0.098            | 89 | 0.023 |
| 368              | Cer d18:1/20:1     | HMDB04951    | 2 | 1.18 (1.10; 1.26) | <b>&lt;0.001</b> | <b>&lt;0.001</b> | 0  | 0.000 |
| 369              | Cer d18:1/22:0     | HMDB04952    | 3 | 1.22 (1.00; 1.47) | <b>0.047</b>     | 0.119            | 90 | 0.026 |
| 370              | Cer d18:1/22:1     | HMDB04951    | 2 | 1.17 (1.08; 1.27) | <b>&lt;0.001</b> | <b>&lt;0.001</b> | 0  | 0.000 |
| 371              | Cer d18:1/24:0     | HMDB04956    | 4 | 1.11 (1.04; 1.20) | <b>0.003</b>     | <b>0.014</b>     | 15 | 0.001 |
| 372              | Cer d18:1/24:1     | HMDB04953    | 4 | 1.15 (1.05; 1.26) | <b>0.003</b>     | <b>0.013</b>     | 51 | 0.004 |
| 373              | Cer d18:1/26:0     | HMDB04955    | 2 | 1.09 (1.01; 1.17) | <b>0.036</b>     | 0.098            | 0  | 0.000 |
| 374              | Cer d18:1/26:1     | NA           | 2 | 1.00 (0.93; 1.07) | 0.973            | 0.988            | 0  | 0.000 |
| 375              | Hex2Cer d18:1/24:0 | NA           | 2 | 1.18 (0.88; 1.58) | 0.267            | 0.411            | 62 | 0.030 |
| 376              | Hex2Cer d18:1/24:1 | NA           | 2 | 1.03 (0.92; 1.15) | 0.584            | 0.698            | 0  | 0.000 |
| 377              | HexCer d18:1/16:0  | CHEBI:77462  | 2 | 1.21 (1.01; 1.44) | <b>0.035</b>     | 0.096            | 85 | 0.014 |
| 378              | HexCer d18:1/18:0  | NA           | 3 | 1.11 (1.05; 1.18) | <b>0.001</b>     | <b>0.004</b>     | 0  | 0.000 |
| 379              | HexCer d18:1/20:0  | NA           | 2 | 1.08 (0.98; 1.18) | 0.101            | 0.213            | 50 | 0.002 |
| 380              | HexCer d18:1/22:0  | NA           | 3 | 1.10 (1.03; 1.17) | <b>0.004</b>     | <b>0.017</b>     | 0  | 0.000 |
| 381              | HexCer d18:1/24:0  | NA           | 3 | 1.11 (1.03; 1.19) | <b>0.004</b>     | <b>0.015</b>     | 0  | 0.000 |

|                    |                                               |             |    |                   |              |              |    |       |
|--------------------|-----------------------------------------------|-------------|----|-------------------|--------------|--------------|----|-------|
| 382                | HexCer d18:1/24:1                             | NA          | 3  | 1.09 (0.83; 1.17) | <b>0.006</b> | <b>0.024</b> | 0  | 0.000 |
| <b>Fatty acids</b> |                                               |             |    |                   |              |              |    |       |
| 383                | 3-carboxy-4-methyl-5-propyl-2-furanpropionate | HMDB61112   | 4  | 0.80 (0.70; 0.92) | <b>0.001</b> | <b>0.005</b> | 0  | 0.000 |
| 384                | 3-hydroxydecanoate                            | HMDB02203   | 2  | 1.13 (0.93; 1.38) | 0.206        | 0.353        | 0  | 0.000 |
| 385                | 3-hydroxyoctanoate                            | HMDB10722   | 2  | 1.22 (0.93; 1.61) | 0.159        | 0.294        | 51 | 0.021 |
| 386                | Adrenate                                      | HMDB02226   | 2  | 1.36 (1.11; 1.66) | <b>0.003</b> | <b>0.012</b> | 0  | 0.000 |
| 387                | Arachidonate                                  | HMDB01043   | 7  | 1.15 (1.02; 1.29) | <b>0.023</b> | 0.070        | 49 | 0.011 |
| 388                | Dihomo-gamma-linolenate                       | HMDB02925   | 2  | 1.48 (0.98; 2.25) | 0.064        | 0.153        | 75 | 0.068 |
| 389                | Docosahexaenoate                              | HMDB02183   | 10 | 1.04 (0.93; 1.16) | 0.498        | 0.624        | 62 | 0.018 |
| 390                | Docosapentaenoate                             | HMDB01976   | 2  | 1.29 (0.83; 2.01) | 0.256        | 0.409        | 83 | 0.085 |
| 391                | Dodecanoate                                   | HMDB00638   | 4  | 1.07 (0.94; 1.22) | 0.282        | 0.426        | 23 | 0.004 |
| 392                | Eicosapentaenoate                             | HMDB01999   | 4  | 1.06 (0.93; 1.20) | 0.374        | 0.520        | 0  | 0.000 |
| 393                | Hexadecanedioate                              | HMDB00672   | 2  | 1.19 (0.99; 1.44) | 0.060        | 0.146        | 0  | 0.000 |
| 394                | Linoleate                                     | HMDB00673   | 11 | 0.96 (0.90; 1.03) | 0.249        | 0.403        | 29 | 0.003 |
| 395                | Linolenate                                    | HMDB01388   | 4  | 1.05 (0.90; 1.21) | 0.540        | 0.662        | 49 | 0.011 |
| 396                | Mystrate                                      | HMDB00806   | 4  | 1.11 (0.87; 1.42) | 0.383        | 0.528        | 77 | 0.046 |
| 397                | Octadecanedioate                              | HMDB00782   | 2  | 1.05 (0.86; 1.29) | 0.612        | 0.727        | 0  | 0.000 |
| 398                | Oleate                                        | HMDB00207   | 5  | 1.10 (0.81; 1.48) | 0.542        | 0.664        | 87 | 0.100 |
| 399                | Palmitate                                     | HMDB00220   | 3  | 1.19 (0.94; 1.51) | 0.157        | 0.287        | 58 | 0.026 |
| 400                | Palmitoleate                                  | HMDB03229   | 2  | 1.12 (0.69; 1.82) | 0.636        | 0.739        | 83 | 0.101 |
| 401                | Pelargonate                                   | HMDB00847   | 2  | 0.99 (0.83; 1.19) | 0.948        | 0.984        | 0  | 0.000 |
| 402                | Pentadecanate                                 | HMDB00826   | 2  | 0.98 (0.85; 1.13) | 0.798        | 0.879        | 19 | 0.002 |
| 403                | Stearate                                      | HMDB00827   | 3  | 1.32 (0.85; 2.06) | 0.218        | 0.362        | 91 | 0.138 |
| 404                | Stearidonate                                  | HMDB06547   | 2  | 1.00 (0.86; 1.16) | 0.979        | 0.986        | 0  | 0.000 |
| 405                | Tetradecanedioate                             | HMDB00872   | 2  | 1.13 (0.95; 1.34) | 0.175        | 0.312        | 0  | 0.000 |
| <b>Bile acids</b>  |                                               |             |    |                   |              |              |    |       |
| 406                | Cholate                                       | HMDB00619   | 2  | 1.15 (0.63; 2.11) | 0.642        | 0.741        | 81 | 0.154 |
| 407                | Deoxycholate                                  | HMDB00626   | 4  | 1.08 (0.83; 1.40) | 0.583        | 0.698        | 86 | 0.055 |
| 408                | Glycochenodeoxycholate                        | CHEBI:36274 | 4  | 1.11 (0.91; 1.34) | 0.311        | 0.458        | 75 | 0.027 |
| 409                | Glycocholate                                  | HMDB00138   | 5  | 1.17 (1.05; 1.29) | <b>0.004</b> | <b>0.017</b> | 63 | 0.008 |
| 410                | Taurochenodeoxycholate                        | HMDB00951   | 4  | 1.16 (0.99; 1.37) | 0.067        | 0.156        | 81 | 0.018 |
| 411                | Taurocholate                                  | HMDB00036   | 2  | 1.06 (0.99; 1.13) | 0.074        | 0.169        | 0  | 0.000 |
| 412                | Taurodeoxycholate                             | HMDB00896   | 2  | 1.02 (0.94; 1.11) | 0.607        | 0.723        | 0  | 0.000 |

Summary relative risk (SRR) with 95% confidence intervals (95% CI) were derived from random-effects meta-analysis model with restricted maximum likelihood estimator.

N – number of studies per comparison, P – P-value for SRR, P-FDR – false discovery rate adjusted P-value for SRR,  $\tau^2$  – between-study variability,  $I^2$  – variability attributable to between-study heterogeneity.

HMDB – Human Metabolome Database, ChEBI - Chemical Entities of Biological Interest.

**Supplementary Table 8.** Meta-regression analysis exploring the influence of number of carbons and double bonds on the association between lipid classes metabolites and incident type 2 diabetes risk.

| Moderator                     | Estimate coefficient | Standard error | P                | $\tau^2$ statistic |
|-------------------------------|----------------------|----------------|------------------|--------------------|
| Triacylglycerols              |                      |                |                  |                    |
| N of carbons                  | -0.182               | 0.003          | <b>&lt;0.001</b> | 0.040              |
| N of double bonds             | -0.030               | 0.003          | <b>&lt;0.001</b> | 0.033              |
| Diacylglycerols               |                      |                |                  |                    |
| N of carbons                  | 0.000                | 0.011          | 0.988            | 0.053              |
| N of double bonds             | -0.036               | 0.014          | <b>0.008</b>     | 0.045              |
| Phosphatidylcholines          |                      |                |                  |                    |
| N of carbons                  | -0.013               | 0.002          | <b>&lt;0.001</b> | 0.036              |
| N of double bonds             | -0.015               | 0.004          | <b>&lt;0.001</b> | 0.036              |
| Lysophosphatidylcholines      |                      |                |                  |                    |
| N of carbons                  | -0.010               | 0.004          | <b>0.006</b>     | 0.035              |
| N of double bonds             | -0.007               | 0.006          | 0.270            | 0.030              |
| Phosphatidylethanolamines     |                      |                |                  |                    |
| N of carbons                  | 0.005                | 0.007          | 0.495            | 0.040              |
| N of double bonds             | -0.004               | 0.009          | 0.693            | 0.040              |
| Lysophosphatidylethanolamines |                      |                |                  |                    |
| N of carbons                  | 0.001                | 0.008          | 0.895            | 0.025              |
| N of double bonds             | 0.001                | 0.007          | 0.911            | 0.025              |
| Phosphatidylinositols         |                      |                |                  |                    |
| N of carbons                  | -0.019               | 0.010          | 0.060            | 0.014              |
| N of double bonds             | -0.025               | 0.012          | <b>0.034</b>     | 0.014              |
| Sphingomyelins                |                      |                |                  |                    |
| N of carbons                  | 0.002                | 0.004          | 0.683            | 0.058              |
| N of double bonds             | -0.101               | 0.013          | <b>&lt;0.001</b> | 0.057              |
| Acylcarnitines                |                      |                |                  |                    |
| Short chain                   | 0.056                | 0.017          | <b>0.049</b>     | 0.012              |
| Medium chain                  | -0.031               | 0.018          | 0.863            | 0.016              |
| Long chain                    | 0.069                | 0.029          | <b>0.016</b>     | 0.071              |

Estimates coefficients (and respective standard errors) were derived from mixed-effect meta-analysis model with moderator as fixed effect (*number of carbons* or *number of double bonds*) and *metabolite* and *study* as random effects (assuming that metabolite is a variable nested in study).

P – P-value for coefficient,  $\tau^2$  – between study variability.

**Supplementary Table 9.** Subgroup analysis for metabolites and risk of incident type 2 diabetes stratified for biospecimen: plasma samples and serum samples.

| Metabolite          | Plasma samples |                   |                | Serum samples |                   |                | P <sub>sub</sub> |
|---------------------|----------------|-------------------|----------------|---------------|-------------------|----------------|------------------|
|                     | N              | SRR (95% CI)      | I <sup>2</sup> | N             | SRR (95% CI)      | I <sup>2</sup> |                  |
| Acylcarnitine C10   | 6              | 1.03 (0.92: 1.16) | 64             | 5             | 0.99 (0.87: 1.12) | 61             | 0.640            |
| Acylcarnitine C12   | 7              | 0.91 (0.79: 1.06) | 81             | 4             | 0.97 (0.83: 1.13) | 48             | 0.575            |
| Acylcarnitine C14   | 8              | 0.97 (0.90: 1.05) | 44             | 2             | 1.12 (0.82: 1.53) | 77             | 0.403            |
| Acylcarnitine C16   | 8              | 1.03 (0.92: 1.15) | 70             | 7             | 1.07 (1.00: 1.16) | 34             | 0.531            |
| Acylcarnitine C18   | 7              | 1.01 (0.71: 1.43) | 97             | 7             | 0.97 (0.91: 1.03) | 0              | 0.846            |
| Acylcarnitine C18:1 | 5              | 0.97 (0.70: 1.35) | 94             | 6             | 1.03 (0.97: 1.09) | 0              | 0.743            |
| Acylcarnitine C18:2 | 5              | 1.16 (0.79: 1.73) | 95             | 5             | 0.98 (0.93: 1.05) | 0              | 0.406            |
| Acylcarnitine C2    | 8              | 1.01 (0.89: 1.13) | 76             | 8             | 1.00 (0.94: 1.05) | 0              | 0.914            |
| Acylcarnitine C3    | 10             | 1.05 (0.95: 1.17) | 75             | 6             | 1.07 (0.95: 1.20) | 69             | 0.857            |
| Acylcarnitine C4    | 9              | 0.92 (0.79: 1.06) | 85             | 5             | 1.04 (0.94: 1.16) | 39             | 0.151            |
| Acylcarnitine C5    | 9              | 1.15 (1.09: 1.21) | 12             | 5             | 1.07 (0.96: 1.18) | 43             | 0.200            |
| Acylcarnitine C6    | 7              | 0.88 (0.71: 1.10) | 92             | 3             | 1.02 (0.89: 1.16) | 31             | 0.290            |
| Acylcarnitine C8    | 8              | 1.00 (0.95: 1.06) | 0              | 5             | 0.92 (0.83: 1.01) | 37             | 0.129            |
| Alanine             | 10             | 1.38 (1.18: 1.61) | 89             | 11            | 1.25 (1.14: 1.38) | 49             | 0.281            |
| Arginine            | 8              | 0.96 (0.86: 1.08) | 72             | 5             | 1.07 (0.88: 1.29) | 87             | 0.366            |
| Betaine             | 7              | 0.84 (0.77: 0.91) | 56             | 3             | 0.72 (0.59: 0.88) | 0              | 0.179            |
| Carnitine           | 8              | 1.02 (0.90: 1.15) | 80             | 6             | 1.08 (0.95: 1.22) | 66             | 0.508            |
| Citrulline          | 8              | 1.02 (0.93: 1.11) | 46             | 4             | 0.97 (0.88: 1.07) | 23             | 0.473            |
| Creatinine          | 5              | 1.01 (0.84: 1.21) | 88             | 8             | 0.95 (0.84: 1.08) | 42             | 0.611            |
| Docosaheptaenoate   | 1              | 1.18 (0.94: 1.49) | -              | 9             | 1.02 (0.91: 1.15) | 64             | 0.283            |
| Glutamate           | 8              | 1.34 (1.12: 1.61) | 92             | 5             | 1.48 (1.13: 1.94) | 90             | 0.545            |
| Glutamine           | 9              | 0.79 (0.67: 0.92) | 90             | 10            | 0.90 (0.77: 1.05) | 87             | 0.257            |
| Glycine             | 6              | 0.65 (0.53: 0.80) | 86             | 12            | 0.87 (0.74: 1.02) | 86             | <b>0.030</b>     |
| Histidine           | 6              | 0.91 (0.82: 1.02) | 71             | 11            | 0.99 (0.93: 1.05) | 19             | 0.241            |
| Isoleucine          | 8              | 1.54 (1.26: 1.88) | 92             | 11            | 1.55 (1.31: 1.83) | 83             | 0.960            |
| Lactate             | 4              | 1.22 (1.09: 1.36) | 69             | 8             | 1.13 (0.90: 1.42) | 84             | 0.574            |
| Leucine             | 8              | 1.45 (1.23: 1.72) | 86             | 15            | 1.38 (1.25: 1.51) | 61             | 0.589            |
| Linoleate           | 1              | 0.79 (0.58: 1.08) | 0              | 10            | 0.97 (0.91: 1.04) | 35             | 0.200            |
| LPC 16:0            | 6              | 0.93 (0.84: 1.03) | 79             | 5             | 1.00 (0.91: 1.11) | 41             | 0.288            |
| LPC 16:1            | 6              | 0.97 (0.91: 1.04) | 49             | 5             | 0.99 (0.85: 1.16) | 70             | 0.782            |
| LPC 18:0            | 6              | 0.91 (0.80: 1.03) | 84             | 7             | 0.87 (0.78: 0.97) | 69             | 0.636            |
| LPC 18:1            | 7              | 0.78 (0.73: 0.84) | 50             | 6             | 0.81 (0.75: 0.87) | 0              | 0.530            |
| LPC 18:2            | 6              | 0.74 (0.65: 0.83) | 82             | 7             | 0.74 (0.68: 0.80) | 0              | 0.994            |
| Lysine              | 8              | 1.11 (1.05: 1.16) | 0              | 3             | 1.07 (0.91: 1.25) | 43             | 0.664            |
| Methionine          | 8              | 1.10 (0.96: 1.26) | 81             | 4             | 1.14 (1.07: 1.21) | 0              | 0.629            |
| Ornithine           | 7              | 1.09 (0.99: 1.21) | 48             | 6             | 1.02 (0.82: 1.28) | 90             | 0.595            |
| Phenylalanine       | 10             | 1.31 (1.16: 1.49) | 81             | 8             | 1.30 (1.01: 1.69) | 94             | 0.970            |
| Pyruvate            | 4              | 1.32 (1.06: 1.65) | 86             | 7             | 1.16 (1.02: 1.32) | 47             | 0.317            |
| Serine              | 7              | 0.96 (0.80: 1.15) | 89             | 5             | 0.90 (0.82: 1.00) | 46             | 0.588            |
| SM 34:1             | 6              | 1.07 (0.94: 1.21) | 84             | 5             | 0.89 (0.82: 0.96) | 32             | <b>0.015</b>     |
| SM 34:2             | 6              | 0.98 (0.86: 1.13) | 80             | 4             | 0.92 (0.75: 1.13) | 93             | 0.595            |
| SM 36:1             | 6              | 1.14 (0.99: 1.31) | 86             | 5             | 1.08 (0.96: 1.20) | 66             | 0.560            |
| SM 36:2             | 6              | 1.01 (0.89: 1.15) | 79             | 4             | 0.98 (0.81: 1.20) | 91             | 0.828            |
| Tryptophan          | 8              | 1.07 (0.89: 1.30) | 91             | 6             | 1.22 (1.03: 1.45) | 73             | 0.326            |
| Tyrosine            | 9              | 1.31 (1.14: 1.51) | 80             | 9             | 1.39 (1.20: 1.62) | 84             | 0.569            |
| Valine              | 11             | 1.32 (1.15: 1.52) | 85             | 8             | 1.54 (1.26: 1.88) | 86             | 0.218            |

CI – confidence interval, I<sup>2</sup> – variability attributable to the between-study heterogeneity, LPC – lysophosphatidylcholines, N – number of studies, SM – sphingomyelins, SRR – summary relative risk, P<sub>sub</sub> – P-value for the difference in coefficient between subgroups.

**Supplementary Table 10.** Subgroup analysis for metabolites and risk of incident type 2 diabetes stratified for study location: United States, Europe, and Asia.

| Metabolite          | United States |                   |                | Europe |                   |                | Asia |                   |                | P <sub>sub</sub> |
|---------------------|---------------|-------------------|----------------|--------|-------------------|----------------|------|-------------------|----------------|------------------|
|                     | N             | SRR (95% CI)      | I <sup>2</sup> | N      | SRR (95% CI)      | I <sup>2</sup> | N    | SRR (95% CI)      | I <sup>2</sup> |                  |
| Acylcarnitine C10   | 1             | 1.12 (0.79: 1.58) | -              | 5      | 1.01 (0.93: 1.11) | 20             | 5    | 1.02 (0.88: 1.19) | 81             | 0.860            |
| Acylcarnitine C12   | 2             | 1.08 (0.80: 1.46) | 57             | 4      | 0.83 (0.67: 1.02) | 66             | 5    | 0.96 (0.84: 1.10) | 78             | 0.310            |
| Acylcarnitine C14   | 2             | 0.97 (0.87: 1.08) | 0              | 3      | 0.91 (0.81: 1.02) | 0              | 5    | 1.06 (0.92: 1.21) | 76             | 0.243            |
| Acylcarnitine C16   | 2             | 0.87 (0.69: 1.10) | 48             | 7      | 1.05 (0.97: 1.15) | 36             | 6    | 1.11 (1.01: 1.20) | 55             | 0.170            |
| Acylcarnitine C18   | 2             | 0.97 (0.85: 1.09) | 0              | 6      | 0.85 (0.72: 1.00) | 69             | 6    | 1.14 (0.80: 1.61) | 97             | 0.251            |
| Acylcarnitine C18:1 | 2             | 0.84 (0.74: 0.94) | 0              | 5      | 0.88 (0.75: 1.04) | 68             | 4    | 1.21 (0.93: 1.58) | 94             | <b>0.042</b>     |
| Acylcarnitine C18:2 | 2             | 0.88 (0.78: 1.01) | 0              | 4      | 0.98 (0.91: 1.06) | 0              | 4    | 1.27 (0.81: 1.98) | 98             | 0.197            |
| Acylcarnitine C2    | 2             | 1.02 (0.92: 1.13) | 0              | 8      | 0.98 (0.92: 1.05) | 0              | 6    | 1.02 (0.91: 1.15) | 77             | 0.727            |
| Acylcarnitine C3    | 2             | 1.06 (1.00: 1.13) | 0              | 8      | 1.06 (0.93: 1.19) | 68             | 6    | 1.05 (0.92: 1.20) | 81             | 0.983            |
| Acylcarnitine C4    | 2             | 0.81 (0.40: 1.64) | 74             | 6      | 0.88 (0.74: 1.04) | 68             | 6    | 1.04 (0.93: 1.15) | 72             | 0.222            |
| Acylcarnitine C5    | 1             | 1.13 (1.04: 1.23) | -              | 8      | 1.15 (1.07: 1.23) | 19             | 5    | 1.06 (0.93: 1.22) | 73             | 0.612            |
| Acylcarnitine C6    | 2             | 0.95 (0.78: 1.15) | 48             | 3      | 0.71 (0.37: 1.34) | 94             | 5    | 1.01 (0.95: 1.07) | 2              | 0.475            |
| Acylcarnitine C8    | 2             | 0.98 (0.84: 1.14) | 0              | 5      | 0.98 (0.89: 1.09) | 15             | 6    | 0.95 (0.88: 1.03) | 46             | 0.889            |
| Alanine             | 2             | 1.31 (0.78: 2.20) | 82             | 14     | 1.33 (1.17: 1.51) | 81             | 5    | 1.34 (1.19: 1.51) | 57             | 0.996            |
| Arginine            | 2             | 1.01 (0.92: 1.12) | 0              | 6      | 1.04 (0.89: 1.22) | 81             | 5    | 0.94 (0.78: 1.12) | 85             | 0.659            |
| Betaine             | 1             | 0.81 (0.71: 0.92) | -              | 7      | 0.80 (0.72: 0.89) | 50             | 2    | 0.86 (0.70: 1.05) | 71             | 0.856            |
| Carnitine           | 2             | 1.11 (0.95: 1.31) | 43             | 7      | 1.03 (0.90: 1.17) | 71             | 5    | 1.03 (0.88: 1.22) | 84             | 0.731            |
| Citrulline          | 2             | 0.98 (0.90: 1.07) | 0              | 5      | 1.03 (0.85: 1.24) | 63             | 5    | 0.99 (0.92: 1.07) | 22             | 0.912            |
| Creatinine          | -             | -                 | -              | 10     | 1.05 (0.94: 1.16) | 56             | 3    | 0.86 (0.73: 1.01) | 64             | <b>0.041</b>     |
| Docosahexaenoate    | -             | -                 | -              | 9      | 1.02 (0.91: 1.15) | 64             | 1    | 1.22 (0.91: 1.63) | 0              | 0.270            |
| Glutamate           | 1             | 1.08 (0.98: 1.20) | 0              | 7      | 1.60 (1.26: 2.03) | 91             | 5    | 1.23 (1.11: 1.36) | 60             | <b>0.008</b>     |
| Glutamine           | 2             | 0.84 (0.76: 0.94) | 0              | 12     | 0.77 (0.68: 0.87) | 82             | 5    | 1.06 (0.89: 1.28) | 86             | <b>0.013</b>     |
| Glycine             | 3             | 0.71 (0.57: 0.87) | 64             | 11     | 0.79 (0.70: 0.89) | 73             | 4    | 0.95 (0.50: 1.80) | 98             | 0.542            |
| Histidine           | 2             | 0.91 (0.75: 1.09) | 28             | 10     | 0.94 (0.87: 1.02) | 52             | 5    | 0.98 (0.87: 1.11) | 66             | 0.726            |
| Isoleucine          | 3             | 1.63 (0.93: 2.87) | 92             | 12     | 1.54 (1.31: 1.82) | 87             | 4    | 1.49 (1.37: 1.63) | 0              | 0.901            |
| Lactate             | 1             | 1.09 (0.99: 1.20) | -              | 10     | 1.16 (0.97: 1.37) | 87             | 1    | 1.42 (1.05: 1.92) | 0              | 0.242            |
| Leucine             | 3             | 1.56 (0.99: 2.44) | 88             | 16     | 1.38 (1.25: 1.52) | 69             | 4    | 1.43 (1.24: 1.64) | 59             | 0.836            |
| Linoleate           | -             | -                 | -              | 10     | 0.94 (0.89: 0.99) | 13             | 1    | 1.44 (1.00: 2.07) | 0              | <b>0.023</b>     |
| LPC 16:0            | 3             | 1.01 (0.93: 1.09) | 9              | 7      | 0.92 (0.81: 1.04) | 83             | 1    | 1.01 (0.89: 1.14) | 0              | 0.426            |
| LPC 16:1            | 3             | 0.91 (0.84: 0.98) | 0              | 7      | 1.03 (0.98: 1.08) | 0              | 1    | 1.04 (0.92: 1.17) | 0              | <b>0.021</b>     |
| LPC 18:0            | 3             | 0.97 (0.89: 1.06) | 22             | 8      | 0.87 (0.78: 0.97) | 83             | 2    | 0.81 (0.59: 1.10) | 77             | 0.201            |
| LPC 18:1            | 3             | 0.82 (0.70: 0.95) | 72             | 9      | 0.78 (0.74: 0.81) | 0              | 1    | 0.81 (0.71: 0.93) | 0              | 0.721            |

|               |   |                   |    |    |                   |    |   |                   |    |                  |
|---------------|---|-------------------|----|----|-------------------|----|---|-------------------|----|------------------|
| LPC 18:2      | 3 | 0.80 (0.65: 0.98) | 83 | 8  | 0.69 (0.65: 0.72) | 0  | 2 | 0.75 (0.65: 0.87) | 0  | 0.246            |
| Lysine        | 1 | 1.05 (0.95: 1.16) | -  | 6  | 1.14 (1.06: 1.24) | 15 | 4 | 1.09 (1.01: 1.17) | 0  | 0.410            |
| Methionine    | 2 | 0.88 (0.63: 1.23) | 50 | 5  | 1.22 (1.04: 1.43) | 82 | 5 | 1.08 (1.01: 1.15) | 3  | 0.163            |
| Ornithine     | 2 | 1.03 (0.93: 1.15) | 0  | 6  | 1.05 (0.88: 1.27) | 73 | 5 | 1.06 (0.88: 1.27) | 87 | 0.973            |
| Phenylalanine | 3 | 1.25 (0.97: 1.62) | 75 | 9  | 1.34 (1.05: 1.71) | 94 | 6 | 1.29 (1.14: 1.45) | 67 | 0.934            |
| Pyruvate      | 1 | 1.00 (0.90: 1.11) | -  | 8  | 1.23 (1.08: 1.40) | 67 | 2 | 1.56 (1.27: 1.91) | 0  | <b>&lt;0.001</b> |
| Serine        | 2 | 0.85 (0.76: 0.95) | 0  | 5  | 1.02 (0.80: 1.31) | 91 | 5 | 0.89 (0.81: 0.99) | 57 | 0.420            |
| SM 34:1       | 4 | 0.98 (0.85: 1.13) | 79 | 4  | 0.87 (0.71: 1.07) | 84 | 3 | 1.08 (0.84: 1.39) | 91 | 0.422            |
| SM 34:2       | 4 | 0.97 (0.80: 1.18) | 85 | 3  | 0.93 (0.78: 1.11) | 90 | 3 | 0.96 (0.73: 1.28) | 88 | 0.948            |
| SM 36:1       | 4 | 1.08 (0.89: 1.31) | 89 | 4  | 1.08 (0.91: 1.30) | 79 | 3 | 1.15 (1.02: 1.29) | 62 | 0.804            |
| SM 36:2       | 4 | 1.00 (0.81: 1.23) | 88 | 3  | 0.99 (0.85: 1.15) | 81 | 3 | 1.02 (0.81: 1.28) | 84 | 0.968            |
| Tryptophan    | 1 | 0.99 (0.88: 1.11) | -  | 9  | 1.22 (1.10: 1.35) | 59 | 4 | 0.99 (0.68: 1.43) | 94 | <b>0.026</b>     |
| Tyrosine      | 2 | 1.13 (0.84: 1.51) | 54 | 10 | 1.38 (1.18: 1.62) | 88 | 6 | 1.35 (1.26: 1.44) | 0  | 0.466            |
| Valine        | 2 | 1.47 (0.80: 2.70) | 87 | 10 | 1.36 (1.16: 1.60) | 87 | 7 | 1.47 (1.23: 1.75) | 82 | 0.806            |

CI – confidence interval,  $I^2$  – variability attributable to the between-study heterogeneity, LPC – lysophosphatidylcholines, N – number of studies, SM – sphingomyelins, SRR – summary relative risk,  $P_{\text{sub}}$  – P-value for the difference in coefficient between subgroups



**Supplementary Table 11.** Subgroup analysis for metabolites and risk of incident type 2 diabetes stratified for fasting status: fasting and non-fasting or mixed.

| Metabolite          | Fasting |                   |                | Non-fasting or mixed |                   |                | P <sub>sub</sub> |
|---------------------|---------|-------------------|----------------|----------------------|-------------------|----------------|------------------|
|                     | N       | SRR (95% CI)      | I <sup>2</sup> | N                    | SRR (95% CI)      | I <sup>2</sup> |                  |
| Acylcarnitine C10   | 9       | 0.99 (0.90: 1.09) | 63             | 2                    | 1.08 (1.00: 1.16) | 0              | 0.178            |
| Acylcarnitine C12   | 10      | 0.91 (0.83: 1.00) | 64             | 1                    | 1.27 (0.96: 1.68) | 0              | <b>0.028</b>     |
| Acylcarnitine C14   | 9       | 0.97 (0.92: 1.03) | 26             | 1                    | 1.35 (1.01: 1.80) | 0              | <b>0.029</b>     |
| Acylcarnitine C16   | 12      | 1.03 (0.96: 1.10) | 54             | 3                    | 1.15 (1.06: 1.25) | 0              | <b>0.046</b>     |
| Acylcarnitine C18   | 11      | 0.99 (0.79: 1.24) | 95             | 3                    | 0.93 (0.76: 1.14) | 51             | 0.714            |
| Acylcarnitine C18:1 | 9       | 0.97 (0.80: 1.17) | 92             | 2                    | 1.03 (0.94: 1.13) | 0              | 0.544            |
| Acylcarnitine C18:2 | 8       | 1.10 (0.86: 1.40) | 94             | 2                    | 0.97 (0.88: 1.06) | 0              | 0.350            |
| Acylcarnitine C2    | 12      | 0.98 (0.90: 1.07) | 71             | 4                    | 1.02 (0.94: 1.10) | 0              | 0.541            |
| Acylcarnitine C3    | 13      | 1.04 (0.96: 1.13) | 73             | 3                    | 1.16 (0.99: 1.36) | 54             | 0.236            |
| Acylcarnitine C4    | 13      | 0.96 (0.87: 1.06) | 78             | 1                    | 1.13 (0.81: 1.57) | 0              | 0.349            |
| Acylcarnitine C5    | 12      | 1.14 (1.09: 1.19) | 9              | 2                    | 0.92 (0.61: 1.37) | 80             | 0.286            |
| Acylcarnitine C6    | 9       | 0.91 (0.79: 1.06) | 87             | 1                    | 1.17 (0.89: 1.54) | 0              | 0.118            |
| Acylcarnitine C8    | 11      | 0.96 (0.91: 1.02) | 18             | 2                    | 0.95 (0.69: 1.31) | 74             | 0.931            |
| Alanine             | 15      | 1.36 (1.21: 1.53) | 86             | 6                    | 1.15 (1.04: 1.27) | 0              | <b>0.027</b>     |
| Arginine            | 11      | 1.00 (0.90: 1.11) | 79             | 2                    | 0.97 (0.63: 1.50) | 87             | 0.893            |
| Betaine             | 8       | 0.84 (0.78: 0.91) | 46             | 2                    | 0.72 (0.62: 0.85) | 0              | 0.090            |
| Carnitine           | 11      | 1.02 (0.93: 1.13) | 74             | 3                    | 1.12 (0.93: 1.34) | 72             | 0.413            |
| Citrulline          | 10      | 1.00 (0.93: 1.07) | 42             | 2                    | 0.99 (0.80: 1.24) | 0              | 0.955            |
| Creatinine          | 8       | 1.01 (0.88: 1.17) | 84             | 5                    | 0.92 (0.81: 1.05) | 0              | 0.323            |
| Docosahexaenoate    | 5       | 0.93 (0.80: 1.07) | 58             | 5                    | 1.18 (1.08: 1.29) | 0              | <b>0.006</b>     |
| Glutamate           | 11      | 1.33 (1.16: 1.53) | 90             | 2                    | 1.97 (0.86: 4.56) | 89             | 0.364            |
| Glutamine           | 13      | 0.84 (0.72: 0.99) | 93             | 6                    | 0.84 (0.78: 0.91) | 0              | 0.978            |
| Glycine             | 10      | 0.74 (0.66: 0.83) | 75             | 8                    | 0.89 (0.66: 1.21) | 92             | 0.269            |
| Histidine           | 11      | 0.93 (0.86: 1.01) | 68             | 6                    | 1.00 (0.93: 1.09) | 0              | 0.182            |
| Isoleucine          | 16      | 1.54 (1.34: 1.77) | 89             | 3                    | 1.54 (1.13: 2.11) | 75             | 0.991            |
| Lactate             | 6       | 1.06 (0.85: 1.31) | 92             | 6                    | 1.29 (1.07: 1.54) | 65             | 0.181            |
| Leucine             | 17      | 1.41 (1.26: 1.57) | 82             | 6                    | 1.36 (1.24: 1.50) | 2              | 0.673            |
| Linoleate           | 5       | 0.92 (0.89: 0.95) | 0              | 6                    | 1.06 (0.95: 1.18) | 14             | <b>0.012</b>     |
| LPC 16:0            | 9       | 0.94 (0.87: 1.01) | 70             | 2                    | 1.08 (0.98: 1.19) | 0              | <b>0.022</b>     |
| LPC 16:1            | 9       | 0.96 (0.90: 1.03) | 47             | 2                    | 1.16 (0.88: 1.52) | 53             | 0.187            |
| LPC 18:0            | 10      | 0.89 (0.82: 0.97) | 76             | 3                    | 0.85 (0.64: 1.12) | 73             | 0.719            |
| LPC 18:1            | 11      | 0.78 (0.74: 0.83) | 33             | 2                    | 0.84 (0.75: 0.94) | 0              | 0.302            |
| LPC 18:2            | 10      | 0.74 (0.68: 0.80) | 66             | 3                    | 0.74 (0.67: 0.82) | 0              | 0.934            |
| Lysine              | 10      | 1.10 (1.05: 1.15) | 0              | 1                    | 1.20 (0.91: 1.58) | 0              | 0.536            |
| Methionine          | 10      | 1.10 (1.01: 1.19) | 63             | 2                    | 1.16 (1.06: 1.27) | 0              | 0.389            |
| Ornithine           | 10      | 1.08 (0.99: 1.17) | 57             | 3                    | 1.05 (0.61: 1.80) | 90             | 0.931            |
| Phenylalanine       | 15      | 1.26 (1.13: 1.41) | 85             | 3                    | 1.77 (0.88: 3.55) | 95             | 0.349            |
| Pyruvate            | 4       | 1.20 (0.99: 1.47) | 83             | 7                    | 1.27 (1.08: 1.50) | 69             | 0.673            |
| Serine              | 10      | 0.94 (0.83: 1.05) | 82             | 2                    | 0.85 (0.60: 1.20) | 75             | 0.592            |
| SM 34:1             | 9       | 1.01 (0.92: 1.12) | 82             | 2                    | 0.66 (0.36: 1.22) | 81             | 0.177            |
| SM 34:2             | 9       | 0.98 (0.87: 1.10) | 85             | 1                    | 0.79 (0.72: 0.88) | 0              | <b>0.007</b>     |
| SM 36:1             | 9       | 1.14 (1.03: 1.25) | 81             | 2                    | 0.89 (0.60: 1.31) | 63             | 0.225            |
| SM 36:2             | 9       | 1.02 (0.91: 1.14) | 85             | 1                    | 0.88 (0.78: 0.99) | 0              | 0.080            |
| Tryptophan          | 11      | 1.06 (0.93: 1.22) | 86             | 3                    | 1.55 (1.11: 2.16) | 68             | <b>0.040</b>     |
| Tyrosine            | 15      | 1.33 (1.19: 1.48) | 82             | 3                    | 1.50 (1.12: 2.00) | 71             | 0.442            |
| Valine              | 15      | 1.34 (1.19: 1.50) | 83             | 4                    | 1.75 (1.26: 2.43) | 84             | 0.131            |

CI – confidence interval, I<sup>2</sup> – variability attributable to the between-study heterogeneity, LPC – lysophosphatidylcholines, N – number of studies, SM – sphingomyelins, SRR – summary relative risk, P<sub>sub</sub> – P-value for the difference in coefficient between subgroups.

**Supplementary Table 12.** Subgroup analysis for metabolites and risk of incident type 2 diabetes stratified for metabolomic platform: mass spectrometry and nuclear magnetic resonance.

| Metabolite          | Mass spectrometry |                   |                | Nuclear magnetic resonance |                   |                | P <sub>sub</sub> |
|---------------------|-------------------|-------------------|----------------|----------------------------|-------------------|----------------|------------------|
|                     | N                 | SRR (95% CI)      | I <sup>2</sup> | N                          | SRR (95% CI)      | I <sup>2</sup> |                  |
| Acylcarnitine C10   | 11                | 1.01 (0.93: 1.10) | 64             | -                          | -                 | -              | -                |
| Acylcarnitine C12   | 11                | 0.93 (0.84: 1.03) | 71             | -                          | -                 | -              | -                |
| Acylcarnitine C14   | 10                | 0.99 (0.92: 1.06) | 44             | -                          | -                 | -              | -                |
| Acylcarnitine C16   | 15                | 1.06 (0.99: 1.12) | 52             | -                          | -                 | -              | -                |
| Acylcarnitine C18   | 14                | 0.97 (0.81: 1.17) | 94             | -                          | -                 | -              | -                |
| Acylcarnitine C18:1 | 11                | 0.98 (0.84: 1.15) | 90             | -                          | -                 | -              | -                |
| Acylcarnitine C18:2 | 10                | 1.08 (0.88: 1.31) | 94             | -                          | -                 | -              | -                |
| Acylcarnitine C2    | 16                | 1.00 (0.94: 1.07) | 56             | -                          | -                 | -              | -                |
| Acylcarnitine C3    | 16                | 1.06 (0.98: 1.14) | 73             | -                          | -                 | -              | -                |
| Acylcarnitine C4    | 14                | 0.97 (0.88: 1.06) | 76             | -                          | -                 | -              | -                |
| Acylcarnitine C5    | 14                | 1.13 (1.08: 1.18) | 18             | -                          | -                 | -              | -                |
| Acylcarnitine C6    | 10                | 0.94 (0.82: 1.07) | 84             | -                          | -                 | -              | -                |
| Acylcarnitine C8    | 13                | 0.97 (0.92: 1.02) | 22             | -                          | -                 | -              | -                |
| Alanine             | 16                | 1.38 (1.23: 1.54) | 83             | 5                          | 1.13 (1.04: 1.23) | 0              | <b>0.007</b>     |
| Arginine            | 13                | 1.00 (0.91: 1.11) | 81             | -                          | -                 | -              | -                |
| Betaine             | 10                | 0.82 (0.76: 0.89) | 49             | -                          | -                 | -              | -                |
| Carnitine           | 14                | 1.04 (0.96: 1.14) | 74             | -                          | -                 | -              | -                |
| Citrulline          | 12                | 1.00 (0.94: 1.06) | 31             | -                          | -                 | -              | -                |
| Creatinine          | 9                 | 1.00 (0.88: 1.15) | 82             | 4                          | 0.93 (0.81: 1.06) | 0              | -                |
| Docosahexaenoate    | 5                 | 0.99 (0.83: 1.18) | 67             | 5                          | 1.09 (0.95: 1.25) | 54             | 0.418            |
| Glutamate           | 13                | 1.38 (1.20: 1.60) | 91             | -                          | -                 | -              | -                |
| Glutamine           | 14                | 0.83 (0.71: 0.96) | 93             | 5                          | 0.87 (0.79: 0.97) | 20             | 0.584            |
| Glycine             | 13                | 0.75 (0.61: 0.91) | 93             | 5                          | 0.90 (0.82: 0.99) | 0              | 0.087            |
| Histidine           | 12                | 0.92 (0.86: 1.00) | 64             | 5                          | 1.04 (0.96: 1.14) | 0              | <b>0.039</b>     |
| Isoleucine          | 19                | 1.54 (1.36: 1.74) | 88             | -                          | -                 | -              | -                |
| Lactate             | 8                 | 1.15 (0.94: 1.40) | 91             | 4                          | 1.19 (0.98: 1.45) | 65             | 0.794            |
| Leucine             | 18                | 1.44 (1.30: 1.60) | 79             | 5                          | 1.28 (1.16: 1.41) | 21             | 0.110            |
| Linoleate           | 6                 | 0.93 (0.81: 1.07) | 46             | 5                          | 1.00 (0.90: 1.11) | 50             | 0.415            |
| LPC 16:0            | 11                | 0.96 (0.89: 1.03) | 70             | -                          | -                 | -              | -                |
| LPC 16:1            | 11                | 0.98 (0.93: 1.04) | 46             | -                          | -                 | -              | -                |
| LPC 18:0            | 13                | 0.89 (0.82: 0.96) | 76             | -                          | -                 | -              | -                |
| LPC 18:1            | 13                | 0.79 (0.75: 0.83) | 24             | -                          | -                 | -              | -                |
| LPC 18:2            | 13                | 0.74 (0.69: 0.79) | 58             | -                          | -                 | -              | -                |
| Lysine              | 11                | 1.10 (1.05: 1.15) | 0              | -                          | -                 | -              | -                |
| Methionine          | 12                | 1.10 (1.04: 1.17) | 46             | -                          | -                 | -              | -                |
| Ornithine           | 13                | 1.06 (0.97: 1.17) | 72             | -                          | -                 | -              | -                |
| Phenylalanine       | 18                | 1.30 (1.16: 1.45) | 87             | -                          | -                 | -              | -                |
| Pyruvate            | 7                 | 1.31 (1.12: 1.54) | 76             | 4                          | 1.10 (0.96: 1.26) | 40             | 0.097            |
| Serine              | 12                | 0.92 (0.83: 1.02) | 80             | -                          | -                 | -              | -                |
| SM 34:1             | 11                | 0.97 (0.88: 1.08) | 85             | -                          | -                 | -              | -                |
| SM 34:2             | 10                | 0.96 (0.86: 1.07) | 87             | -                          | -                 | -              | -                |
| SM 36:1             | 11                | 1.11 (1.01: 1.21) | 81             | -                          | -                 | -              | -                |
| SM 36:2             | 10                | 1.00 (0.90: 1.11) | 85             | -                          | -                 | -              | -                |
| Tryptophan          | 14                | 1.14 (0.99: 1.30) | 88             | -                          | -                 | -              | -                |
| Tyrosine            | 18                | 1.35 (1.22: 1.49) | 81             | -                          | -                 | -              | -                |
| Valine              | 19                | 1.40 (1.25: 1.57) | 86             | -                          | -                 | -              | -                |

CI – confidence interval, I<sup>2</sup> – variability attributable to the between-study heterogeneity, LPC – lysophosphatidylcholines, N – number of studies, SM – sphingomyelins, SRR – summary relative risk, P<sub>sub</sub> – P-value for the difference in coefficient between subgroups.

**Supplementary Table 13.** Subgroup analysis for metabolites and risk of incident type 2 diabetes stratified for fasting glucose adjustment: adjusted and non-adjusted.

| Metabolite          | Adjusted |                   |                | Non-adjusted |                   |                | P <sub>sub</sub> |
|---------------------|----------|-------------------|----------------|--------------|-------------------|----------------|------------------|
|                     | N        | SRR (95% CI)      | I <sup>2</sup> | N            | SRR (95% CI)      | I <sup>2</sup> |                  |
| Acylcarnitine C10   | 4        | 1.04 (0.90: 1.02) | 75             | 7            | 0.99 (0.89: 1.10) | 50             | 0.536            |
| Acylcarnitine C12   | 5        | 0.93 (0.84: 1.03) | 65             | 6            | 0.94 (0.75: 1.18) | 80             | 0.913            |
| Acylcarnitine C14   | 6        | 0.99 (0.92: 1.08) | 48             | 4            | 0.98 (0.80: 1.20) | 67             | 0.912            |
| Acylcarnitine C16   | 7        | 1.10 (1.01: 1.20) | 59             | 8            | 1.01 (0.92: 1.10) | 48             | 0.171            |
| Acylcarnitine C18   | 5        | 1.13 (0.73: 1.75) | 98             | 9            | 0.92 (0.83: 1.01) | 52             | 0.349            |
| Acylcarnitine C18:1 | 3        | 1.11 (0.70: 1.77) | 97             | 8            | 0.95 (0.85: 1.07) | 69             | 0.509            |
| Acylcarnitine C18:2 | 3        | 1.34 (0.72: 2.48) | 98             | 7            | 0.98 (0.92: 1.04) | 0              | 0.323            |
| Acylcarnitine C2    | 7        | 1.03 (0.93: 1.14) | 69             | 9            | 0.99 (0.93: 1.05) | 0              | 0.524            |
| Acylcarnitine C3    | 8        | 1.06 (0.95: 1.18) | 76             | 8            | 1.06 (0.94: 1.19) | 71             | 0.988            |
| Acylcarnitine C4    | 6        | 1.02 (0.93: 1.12) | 64             | 8            | 0.90 (0.76: 1.07) | 81             | 0.214            |
| Acylcarnitine C5    | 9        | 1.15 (1.10: 1.21) | 8              | 5            | 1.07 (0.99: 1.16) | 0              | 0.121            |
| Acylcarnitine C6    | 5        | 1.00 (0.94: 1.07) | 0              | 5            | 0.81 (0.56: 1.17) | 92             | 0.261            |
| Acylcarnitine C8    | 7        | 1.01 (0.96: 1.07) | 0              | 6            | 0.89 (0.83: 0.96) | 0              | <b>0.009</b>     |
| Alanine             | 12       | 1.23 (1.12: 1.36) | 72             | 9            | 1.48 (1.24: 1.76) | 82             | 0.071            |
| Arginine            | 5        | 0.90 (0.80: 1.01) | 61             | 8            | 1.09 (0.96: 1.23) | 78             | <b>0.027</b>     |
| Betaine             | 6        | 0.81 (0.75: 0.88) | 38             | 4            | 0.81 (0.67: 0.98) | 53             | 0.937            |
| Carnitine           | 7        | 1.00 (0.89: 1.13) | 79             | 7            | 1.09 (0.97: 1.24) | 66             | 0.327            |
| Citrulline          | 6        | 1.02 (0.91: 1.14) | 65             | 6            | 0.97 (0.89: 1.06) | 9              | 0.479            |
| Creatinine          | 8        | 0.97 (0.84: 1.12) | 74             | 5            | 1.00 (0.85: 1.18) | 69             | 0.734            |
| Docosahexaenoate    | 6        | 1.10 (0.98: 1.24) | 53             | 4            | 0.94 (0.76: 1.16) | 64             | 0.197            |
| Glutamate           | 6        | 1.29 (1.01: 1.63) | 93             | 7            | 1.46 (1.26: 1.68) | 79             | 0.382            |
| Glutamine           | 11       | 0.88 (0.82: 0.93) | 31             | 8            | 0.79 (0.60: 1.03) | 96             | 0.454            |
| Glycine             | 7        | 0.84 (0.75: 0.93) | 51             | 11           | 0.75 (0.59: 0.96) | 95             | 0.431            |
| Histidine           | 9        | 0.99 (0.92: 1.07) | 41             | 8            | 0.91 (0.83: 1.00) | 62             | 0.136            |
| Isoleucine          | 7        | 1.65 (1.32: 2.07) | 86             | 12           | 1.48 (1.27: 1.71) | 87             | 0.408            |
| Lactate             | 7        | 1.21 (1.08: 1.37) | 68             | 5            | 1.09 (0.77: 1.53) | 90             | 0.553            |
| Leucine             | 12       | 1.44 (1.27: 1.64) | 76             | 11           | 1.36 (1.21: 1.52) | 69             | 0.463            |
| Linoleate           | 5        | 1.03 (0.94: 1.12) | 0              | 6            | 0.92 (0.89: 0.95) | 0              | <b>0.016</b>     |
| LPC 16:0            | 3        | 0.90 (0.69: 1.17) | 83             | 8            | 0.97 (0.91: 1.03) | 58             | 0.594            |
| LPC 16:1            | 3        | 0.94 (0.85: 1.03) | 0              | 8            | 1.00 (0.92: 1.07) | 59             | 0.297            |
| LPC 18:0            | 4        | 0.90 (0.75: 1.08) | 83             | 9            | 0.88 (0.81: 0.97) | 75             | 0.878            |
| LPC 18:1            | 4        | 0.77 (0.65: 0.90) | 69             | 9            | 0.79 (0.76: 0.82) | 0              | 0.711            |
| LPC 18:2            | 3        | 0.76 (0.61: 0.93) | 74             | 10           | 0.73 (0.67: 0.78) | 52             | 0.740            |
| Lysine              | 6        | 1.09 (1.02: 1.17) | 11             | 5            | 1.12 (1.05: 1.19) | 0              | 0.672            |
| Methionine          | 5        | 1.04 (0.96: 1.14) | 30             | 7            | 1.14 (1.08: 1.20) | 0              | 0.088            |
| Ornithine           | 5        | 1.13 (1.02: 1.25) | 46             | 8            | 1.01 (0.85: 1.19) | 83             | 0.261            |
| Phenylalanine       | 8        | 1.29 (1.12: 1.50) | 80             | 10           | 1.32 (1.08: 1.61) | 93             | 0.871            |
| Pyruvate            | 7        | 1.18 (1.03: 1.35) | 77             | 4            | 1.39 (1.11: 1.74) | 56             | 0.225            |
| Serine              | 4        | 0.89 (0.80: 0.98) | 44             | 8            | 0.95 (0.80: 1.13) | 89             | 0.521            |
| SM 34:1             | 4        | 1.08 (0.88: 1.34) | 88             | 7            | 0.93 (0.85: 1.02) | 68             | 0.193            |
| SM 34:2             | 5        | 0.96 (0.83: 1.13) | 82             | 5            | 0.95 (0.80: 1.13) | 91             | 0.882            |
| SM 36:1             | 4        | 1.06 (0.88: 1.29) | 85             | 7            | 1.14 (1.04: 1.25) | 73             | 0.511            |
| SM 36:2             | 5        | 0.98 (0.85: 1.13) | 76             | 5            | 1.01 (0.86: 1.19) | 90             | 0.749            |
| Tryptophan          | 6        | 1.03 (0.81: 1.31) | 92             | 8            | 1.18 (1.09: 1.27) | 30             | 0.297            |
| Tyrosine            | 8        | 1.36 (1.15: 1.60) | 83             | 10           | 1.33 (1.27: 1.39) | 0              | 0.802            |
| Valine              | 7        | 1.37 (1.10: 1.72) | 91             | 12           | 1.41 (1.26: 1.58) | 77             | 0.837            |

CI – confidence interval, I<sup>2</sup> – variability attributable to the between-study heterogeneity, LPC – lysophosphatidylcholines, N – number of studies, SM – sphingomyelins, SRR – summary relative risk, P<sub>sub</sub> – P-value for the difference in coefficient between subgroups.

**Supplementary Table 14.** Subgroup analysis for metabolites and risk of incident type 2 diabetes stratified for length of follow-up: ≤7 years and >7 years.

| Metabolite          | ≤7 years |                   |                | >7 years |                   |                | P <sub>sub</sub> |
|---------------------|----------|-------------------|----------------|----------|-------------------|----------------|------------------|
|                     | N        | SRR (95% CI)      | I <sup>2</sup> | N        | SRR (95% CI)      | I <sup>2</sup> |                  |
| Acylcarnitine C10   | 7        | 1.08 (0.99: 1.17) | 48             | 4        | 0.89 (0.81: 0.97) | 0              | <b>0.002</b>     |
| Acylcarnitine C12   | 7        | 0.93 (0.78: 1.11) | 86             | 4        | 0.95 (0.85: 1.05) | 19             | 0.876            |
| Acylcarnitine C14   | 8        | 0.96 (0.91: 1.02) | 0              | 2        | 1.10 (0.85: 1.42) | 83             | 0.311            |
| Acylcarnitine C16   | 9        | 1.04 (0.96: 1.11) | 44             | 6        | 1.09 (0.97: 1.23) | 64             | 0.443            |
| Acylcarnitine C18   | 9        | 1.00 (0.75: 1.32) | 96             | 5        | 0.93 (0.86: 1.00) | 6              | 0.636            |
| Acylcarnitine C18:1 | 7        | 0.99 (0.79: 1.26) | 93             | 4        | 0.99 (0.86: 1.13) | 61             | 0.950            |
| Acylcarnitine C18:2 | 7        | 1.12 (0.84: 1.48) | 95             | 3        | 1.00 (0.92: 1.08) | 0              | 0.452            |
| Acylcarnitine C2    | 11       | 1.04 (0.98: 1.11) | 35             | 5        | 0.90 (0.77: 1.05) | 74             | 0.082            |
| Acylcarnitine C3    | 10       | 1.11 (1.01: 1.21) | 69             | 5        | 0.96 (0.84: 1.10) | 71             | 0.085            |
| Acylcarnitine C4    | 8        | 0.97 (0.82: 1.13) | 85             | 5        | 0.98 (0.86: 1.12) | 65             | 0.868            |
| Acylcarnitine C5    | 8        | 1.15 (1.05: 1.26) | 59             | 4        | 1.05 (0.97: 1.14) | 0              | 0.152            |
| Acylcarnitine C6    | 7        | 0.91 (0.71: 1.16) | 93             | 3        | 0.96 (0.85: 1.09) | 39             | 0.666            |
| Acylcarnitine C8    | 8        | 0.99 (0.93: 1.05) | 4              | 5        | 0.95 (0.86: 1.04) | 36             | 0.419            |
| Alanine             | 9        | 1.32 (1.12: 1.55) | 83             | 12       | 1.33 (1.19: 1.48) | 76             | 0.925            |
| Arginine            | 8        | 0.98 (0.87: 1.09) | 69             | 5        | 1.05 (0.87: 1.27) | 89             | 0.512            |
| Betaine             | 5        | 0.83 (0.75: 0.92) | 37             | 5        | 0.81 (0.71: 0.92) | 57             | 0.733            |
| Carnitine           | 8        | 1.07 (0.95: 1.20) | 79             | 6        | 1.00 (0.88: 1.14) | 64             | 0.470            |
| Citrulline          | 7        | 1.03 (0.93: 1.15) | 57             | 4        | 0.96 (0.88: 1.05) | 17             | 0.297            |
| Creatinine          | 3        | 1.06 (0.81: 1.41) | 78             | 10       | 0.96 (0.86: 1.07) | 67             | 0.495            |
| Docosahexaenoate    | 3        | 1.06 (0.84: 1.33) | 66             | 6        | 1.07 (0.92: 1.24) | 59             | 0.940            |
| Glutamate           | 8        | 1.45 (1.14: 1.85) | 93             | 5        | 1.32 (1.17: 1.50) | 78             | 0.506            |
| Glutamine           | 7        | 0.75 (0.60: 0.93) | 92             | 12       | 0.90 (0.79: 1.02) | 85             | 0.157            |
| Glycine             | 7        | 0.79 (0.52: 1.19) | 95             | 10       | 0.81 (0.75: 0.88) | 52             | 0.885            |
| Histidine           | 6        | 0.96 (0.86: 1.06) | 55             | 11       | 0.95 (0.88: 1.03) | 57             | 0.901            |
| Isoleucine          | 8        | 1.61 (1.29: 2.01) | 91             | 10       | 1.52 (1.29: 1.81) | 86             | 0.694            |
| Lactate             | 4        | 1.27 (1.07: 1.51) | 65             | 8        | 1.10 (0.91: 1.33) | 87             | 0.274            |
| Leucine             | 7        | 1.49 (1.23: 1.81) | 72             | 15       | 1.39 (1.26: 1.53) | 75             | 0.520            |
| Linoleate           | 4        | 0.96 (0.80: 1.14) | 60             | 6        | 0.99 (0.87: 1.12) | 38             | 0.764            |
| LPC 16:0            | 5        | 0.96 (0.82: 1.13) | 84             | 6        | 0.94 (0.88: 1.01) | 46             | 0.815            |
| LPC 16:1            | 5        | 0.98 (0.89: 1.08) | 55             | 6        | 1.02 (0.96: 1.07) | 0              | 0.493            |
| LPC 18:0            | 6        | 0.86 (0.73: 1.02) | 85             | 6        | 0.88 (0.80: 0.98) | 72             | 0.816            |
| LPC 18:1            | 6        | 0.81 (0.73: 0.89) | 54             | 7        | 0.77 (0.74: 0.81) | 0              | 0.482            |
| LPC 18:2            | 7        | 0.80 (0.73: 0.87) | 32             | 6        | 0.67 (0.64: 0.71) | 0              | <b>0.001</b>     |
| Lysine              | 6        | 1.15 (1.06: 1.24) | 25             | 5        | 1.07 (0.99: 1.15) | 27             | 0.205            |
| Methionine          | 7        | 1.11 (0.95: 1.30) | 82             | 5        | 1.11 (1.05: 1.18) | 0              | 0.964            |
| Ornithine           | 9        | 1.06 (0.92: 1.22) | 79             | 4        | 1.06 (0.92: 1.21) | 68             | 0.973            |
| Phenylalanine       | 9        | 1.34 (1.10: 1.62) | 89             | 9        | 1.28 (1.10: 1.49) | 88             | 0.719            |
| Pyruvate            | 4        | 1.26 (1.02: 1.55) | 76             | 6        | 1.18 (1.01: 1.37) | 70             | 0.636            |
| Serine              | 7        | 0.95 (0.77: 1.17) | 89             | 5        | 0.91 (0.84: 0.97) | 27             | 0.694            |
| SM 34:1             | 6        | 0.92 (0.78: 1.09) | 92             | 5        | 1.02 (0.89: 1.18) | 71             | 0.367            |
| SM 34:2             | 5        | 0.96 (0.80: 1.16) | 92             | 4        | 0.95 (0.79: 1.13) | 72             | 0.884            |
| SM 36:1             | 6        | 1.07 (0.93: 1.24) | 89             | 5        | 1.15 (1.01: 1.30) | 63             | 0.493            |
| SM 36:2             | 5        | 1.01 (0.85: 1.20) | 92             | 4        | 1.00 (0.84: 1.17) | 71             | 0.909            |
| Tryptophan          | 9        | 1.24 (1.07: 1.45) | 82             | 5        | 0.96 (0.77: 1.20) | 89             | 0.056            |
| Tyrosine            | 9        | 1.25 (1.12: 1.41) | 61             | 8        | 1.46 (1.24: 1.72) | 87             | 0.130            |
| Valine              | 9        | 1.34 (1.12: 1.61) | 88             | 8        | 1.45 (1.22: 1.73) | 87             | 0.549            |

CI – confidence interval, I<sup>2</sup> – variability attributable to the between-study heterogeneity, LPC – lysophosphatidylcholines, N – number of studies, SM – sphingomyelins, SRR – summary relative risk, P<sub>sub</sub> – P-value for the difference in coefficient between subgroups.

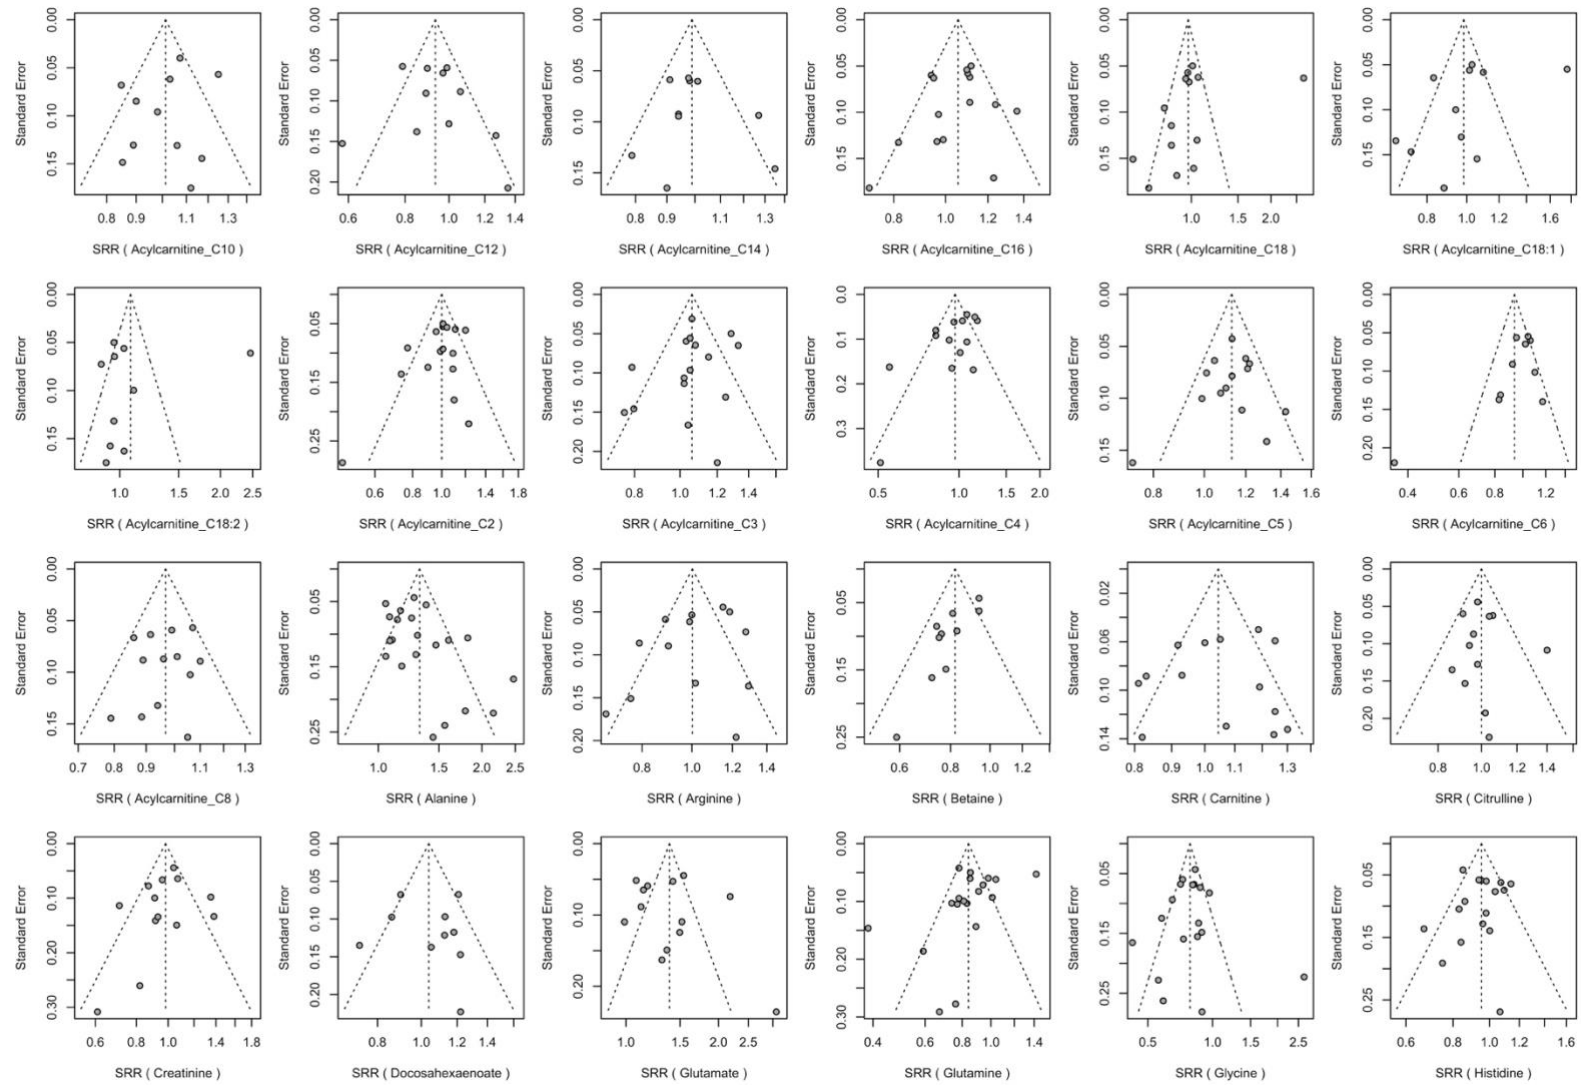

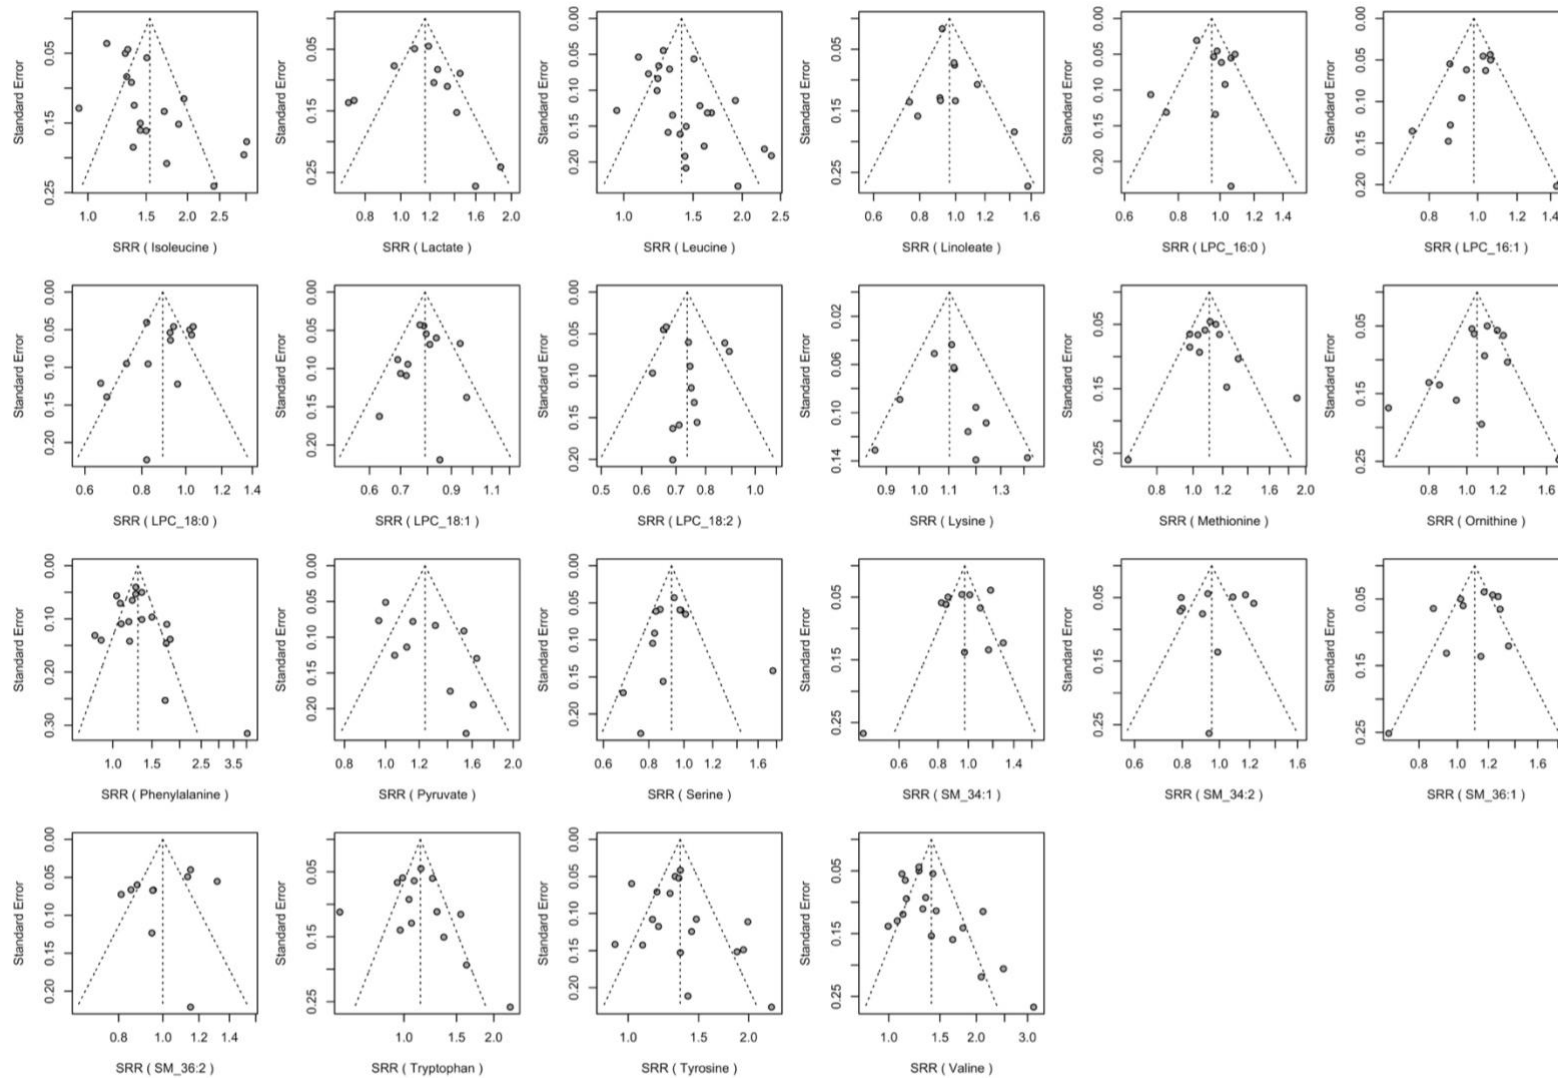

**Supplementary Figure 1.** Funnel plots showing study precision against the relative risk with 95% confidence intervals for incident type 2 diabetes. LPC – lysophosphatidylcholines, SM – sphingomyelins, SRR – summary relative risk.

**Supplementary Table 15.** Results of Egger's linear regression test for funnel plot asymmetry.

| Metabolite          | P <sub>Egger</sub> |
|---------------------|--------------------|
| Acylcarnitine C10   | 0.642              |
| Acylcarnitine C12   | 0.510              |
| Acylcarnitine C14   | 0.699              |
| Acylcarnitine C16   | 0.271              |
| Acylcarnitine C18   | 0.067              |
| Acylcarnitine C18:1 | 0.095              |
| Acylcarnitine C18:2 | 0.394              |
| Acylcarnitine C2    | 0.064              |
| Acylcarnitine C3    | 0.175              |
| Acylcarnitine C4    | <b>0.008</b>       |
| Acylcarnitine C5    | 0.499              |
| Acylcarnitine C6    | <b>0.002</b>       |
| Acylcarnitine C8    | 0.588              |
| Alanine             | <b>0.006</b>       |
| Arginine            | 0.369              |
| Betaine             | <b>0.001</b>       |
| Carnitine           | 0.905              |
| Citrulline          | 0.903              |
| Creatinine          | 0.248              |
| Docosahexaenoate    | 0.677              |
| Glutamate           | 0.109              |
| Glutamine           | <b>0.014</b>       |
| Glycine             | 0.779              |
| Histidine           | 0.233              |
| Isoleucine          | <b>0.001</b>       |
| Lactate             | 0.301              |
| Leucine             | <b>0.002</b>       |
| Linoleate           | 0.064              |
| LPC 16:0            | 0.399              |
| LPC 16:1            | 0.327              |
| LPC 18:0            | <b>0.015</b>       |
| LPC 18:1            | 0.507              |
| LPC 18:2            | 0.961              |
| Lysine              | 0.435              |
| Methionine          | 0.543              |
| Ornithine           | 0.253              |
| Phenylalanine       | <b>0.013</b>       |
| Pyruvate            | <b>0.027</b>       |
| Serine              | 0.777              |
| SM 34:1             | 0.271              |
| SM 34:2             | 0.803              |
| SM 36:1             | 0.160              |
| SM 36:2             | 0.829              |
| Tryptophan          | <b>0.043</b>       |
| Tyrosine            | 0.081              |
| Valine              | <b>&lt;0.001</b>   |

LPC – lysophosphatidylcholines, SM – sphingomyelins,

P<sub>Egger</sub> – P-value for Egger's linear regression test.
